# Supplementary material for: Co-benefits of designing communities for active living: an exploration of literature
Source: Int J Behav Nutr Phys Act. 2015 Feb 28;12:30. doi: 10.1186/s12966-015-0188-2 (PMC4349686; doi:10.1186/s12966-015-0188-2)
Supplement: Additional file 1: — Detailed Information About Each Study Coded. A spreadsheet of the five setting-specific tables with notes about each reviewed report/study and codes for findings so sources and interpretations are transparent to reviewers and readers. Available on the Active Living Research website [http://activelivingresearch.org/making-case-designing-active-cities]. [file 12966_2015_188_MOESM1_ESM.xlsx]

## Sheet: Parks
OPEN SPACES / PARKS / TRAILS
RESOURCE #	FEATURE	CO-BENEFIT	RESOURCE	LINK	SAMPLE CHARACTERISTICS	METHODS	FINDINGS	GRADING THE EVIDENCE	DIRECTION OF ASSOCIATION
1	Presence/Proximity	Mental Health	Di Nardo, F, Saulle, R, & La Torre, G. (2010). Green Areas and Health Outcomes: A Systematic Review of the Scientific Literature. Italian Journal of Public Health, 7(4), 402-413.	http://ijphjournal.it/article/view/5699	Adults, International	Literature review of 15 studies on the relationship between green spaces and health.	Four studies found that the possibility to access green spaces positively affects stress and quality of life.	4.5	+
2	Presence/Proximity	Social Benefits	Di Nardo, F, Saulle, R, & La Torre, G. (2010). Green Areas and Health Outcomes: A Systematic Review of the Scientific Literature. Italian Journal of Public Health, 7(4), 402-413.	http://ijphjournal.it/article/view/5699	Adults, International	Literature review of 15 studies on the relationship between green spaces and health.	Four studies found that social capital is positively influenced by green spaces which provide a meeting place for users to develop and maintain neighborhood social ties.	4.5	+
3	Presence/Proximity	Physical Health; Mental Health	From Di Nardo et al Review: Stigsdotter, UK, Ekholm, O, Schipperijn, J, Toftager, M, Kamper-Jørgensen, F, & Randrup, TB. (2010). Health Promoting Outdoor Environments: Associations between Green Space, and Health, Health-related Quality of Life and Stress based on a Danish National Representative Survey. Scandinavian Journal of Public Health, 38(4), 411-417.	http://www.ncbi.nlm.nih.gov/pubmed/20413584	Data from the 2005 health interview survey and based on a region stratified random sample of 21, 832 adult Danes (people living in Denmark).	Cross-sectional study Data were collected via face-to-face interviews followed by a self-administered questionnaire, including the SF-36 (http://www.sf-36.org/tools/sf36.shtml), which measures eight dimensions of health (including physical and mental) and the Perceived Stress Scale (http://www.mindgarden.com/products/pss.htm), which measures self-reported stress. In this study, all types of natur…	People living less than 300m from a green space declare better perceived physical and mental health than people living more distant. Specifically, 82.1% of respondents living less than 300m from a green space declared that they had “really good” or “good” self-rated health compared with 72.4% among respondents living more than 1km from a green space, who reported report poorer health and health-r…	3.5	+
4	Presence/Proximity	Mental Health	From Di Nardo et al Review: Stigsdotter, UK, Ekholm, O, Schipperijn, J, Toftager, M, Kamper-Jørgensen, F, & Randrup, TB. (2010). Health Promoting Outdoor Environments: Associations between Green Space, and Health, Health-related Quality of Life and Stress based on a Danish National Representative Survey. Scandinavian Journal of Public Health, 38(4), 411-417.	http://www.ncbi.nlm.nih.gov/pubmed/20413584	Data from the 2005 health interview survey and based on a region stratified random sample of 21,832 adult Danes (people living in Denmark).	Cross-sectional study Data were collected via face-to-face interviews followed by a self-administered questionnaire, including the SF-36 (http://www.sf-36.org/tools/sf36.shtml), which measures eight dimensions of health (including physical and mental) and the Perceived Stress Scale (http://www.mindgarden.com/products/pss.htm), which measures self-reported stress. In this study, all types of natur…	People living more than 1km away from a green space resulted as having 1.42 higher odds of experiencing stress than those living less than 300m from a green space. An analysis of the association between stress and visits to green spaces showed that respondents who do not report stress have 1.57 (95% CI 1.40–1.76) higher odds of visiting a green space at least a few days a week than those reportin…	3.5	+
5	Presence/Proximity	Physical Health; Mental Health	Maas, J, Verheij, RA, Groenewegen, PP, de Vries, S, & Spreeuwenberg, P. (2006). Green Space, Urbanity, and Health: How Strong is the Relation? Journal of Epidemiology & Community Health, 60(7), 587-592.	http://jech.bmj.com/content/60/7/587.full.pdf+html	250,782 adults living in the Netherlands registered with 104 general practices	Cross-sectional study Participants filled in a self administered form on sociodemographic background and perceived general health. Multilevel logistic regression analyses were performed at three levels—that is, individual level, family level, and practice level—controlled for sociodemographic characteristics.	In areas where 90% of the environment around the home is green, only 10.2% of the residents feel unhealthy*, as compared with areas in which 10% of the environment is green, where 15.5% of the residents feel unhealthy. *Perceived general health was self rated by respondents by replying to the following statement: ‘‘In general, would you say that your health is…’’ They could respond by one of the …	3.5	+
6	Presence/Proximity	Physical Health	Richardson, E, Pearce, J, Mitchell, R, Day, P, & Kingham, S. (2010). The Association between Green Space and Cause-specific Mortality in Urban New Zealand: An Ecological Analysis of Green Space Utility. BMC Public Health, 10: 240.	http://www.biomedcentral.com/content/pdf/1471-2458-10-240.pdf	1,546,405 living in 1009 small urban areas in New Zealand	Observational study (cohort study) A neighbourhood-level classification was developed to distinguish between usable (i.e., visitable) and non-usable green space (i.e., visible but not visitable) in the urban areas. Negative binomial regression models were fitted to examine the association between quartiles of area-level green space availability and risk of mortality from cardiovascular disease (n…	No relationship between availability of total green space and cardio-vascular disease (CVD) mortality and no evidence that CVD mortality was inversely related to the availability of either total or usable green space, suggesting that the relationships between green space and health may vary according to national, societal or environmental contexts.	3.5	0
7	Presence/Proximity	Physical Health; Mental Health	Sugiyama, T, Leslie, E, Giles-Corti, B, & Owen, N. (2008). Associations of Neighbourhood Greenness with Physical and Mental Health: Do Walking, Social Coherence and Local Social Interaction Explain the Relationships? Journal of Epidemiology & Community Health, 62(5), e9.	http://jech.bmj.com/content/62/5/e9.abstract	1,895 adults in Adelaide, Australia	Observational study (case-control study) A mailed survey collected the following data: physical and mental health scores (12-item short-form health survey); perceived neighbourhood greenness (measured using five questions from the Neighbourhood Environment Walkability Scale); walking for recreation and for transport; social coherence; local social interaction and sociodemographic variables.	People who perceive their neighbourhoods to have the highest degree of greenness have 1.37 higher odds of reporting better physical health and 1.60 higher odds of reporting better mental health.	3.5	+
8	Presence/Proximity	Physical Health	Richardson, EA & Mitchell, R. (2010). Gender Differences in Relationships between Urban Green Space and Health in the United Kingdom. Social Science & Medicine, 71(3), 568-575.	http://www.sciencedirect.com/science/article/pii/S027795361000345X	6432 urban wards in the UK, with a total population of 28.6 million adults aged 16–64 years in 2001.	Observational study (cohort study) Two land use datasets were used to create a proportional green space measure (% by area) at the UK Census Area Statistic ward scale. Authors selected health outcomes that were plausibly related to green space (cardiovascular disease mortality, respiratory disease mortality and self-reported limiting long-term illness) and another that was expected to be unrelate…	The risk of cardiovascular and respiratory disease mortality decreased with increasing green areas for males (p < 0.001), and was lowest for the greenest wards (cardiovascular disease: incidence rate ratio (IRR) 0.95, 95% CI 0.91-0.98; respiratory disease: IRR 0.89, 95% CI 0.83-0.96). Thus, males living in the greenest urban wards in the UK had a 5% lower risk of cardiovascular disease mortality …	3.5	+
9	Presence/Proximity	Social Benefits; Injury Prevention (Perceived Safety)	From DiNardo et al Review: Kuo, FE, Sullivan, WC, Coley, RL, & Brunson, L. (1998). Fertile Ground for Community: Inner-city Neighbourhood Common Spaces. American Journal of Community Psychology, 26(6), 823–851.	http://www.willsull.net/resources/KuoSullivanColeyBrunson1998.pdf	145 urban public housing residents in Chicago, Illinois. Because official adult residents in urban public housing are predominately female (80% in RTH; Chicago Housing Authority, 1995), the sample was restricted to adult women residents; specifically, female heads of household under 60 years old. The composite participant profile was that of an African American single woman with a high school/GED…	Two-part structured interview: Participants' ratings of greenness, mood, stress, and mental fatigue were collected in the first part of the interview; information about participants' neighborhood social ties, sense of safety, and sense of adjustment were collected in the second part. Data for the study were drawn from the Coping with Poverty archive. A series of one-way ANOVAs were conducted wher…	The more vegetation in a common space, the stronger the neighborhood social ties near that space—compared to residents living adjacent to relatively barren spaces, individuals living adjacent to greener common spaces had more social activities and more visitors, knew more of their neighbors, reported their neighbors were more concerned with helping and supporting one another, and had stronger fee…	3.5	+
10	Presence/Proximity	Mental Health; Injury Prevention (Perceived Safety)	Guite, HF, Clark, C, & Ackrill, G. (2006). The Impact of the Physical and Urban Environment on Mental Well-being. Public Health, 120(12), 1117-1126.	http://www.sciencedirect.com/science/article/pii/S0033350606003015	2696 adults aged 18 years or over, in four areas of Greenwich, London were surveyed. 1012 questionnaires were returned (38% response rate).	Cross-sectional questionnaire study A postal survey based on a theoretical model of domains that might link the physical and urban environment with mental well-being was used.	Significant relationships between poor mental health and: being dissatisfied with access to green open spaces (OR 1.69, 95% CI 1.05, 2.74), poor access to community facilities (OR 1.92, 95% CI 1.24, 3.00)	3.5	+
11	Presence/Proximity	Physical Health; Social Benefits	Mitchell, R, Popham, F. (2008). Effect of Exposure to Natural Environment on Health Inequalities: An Observational Population Study. Lancet, 372, 1655–60.	http://www.sciencedirect.com/science/article/pii/S014067360861689X	Population of England at younger than retirement age (n=40, 813,236)	Observational population study Study population was classified into groups on the basis of income deprivation and exposure to green space. Authors obtained individual mortality records (n=366,348) to establish whether the association between income deprivation, all-cause mortality, and cause-specific mortality (circulatory disease, lung cancer, and intentional self-harm) in 2001–05, varied by exp…	People with greater exposure to green space were more likely to be less deprived than were those with little exposure to such areas (r2=−0·28, p<0.0001). A significant interaction was detected between income deprivation and exposure to green space in the relation with deaths from all causes (p<0.0001) and from circulatory disease (p=0.0212), indicating that the inequality in all-cause and circula…	3.5	+
12	Presence/Proximity	Social Benefits	From DiNardo et al Review: Maas, J, van Dillen, SM, Verheij, RA, Groenewegen, PP. (2009). Social Contacts as a Possible Mechanism Behind the Relation between Green Space and Health. Health & Place, 15(2), 586–95.	http://www.sciencedirect.com/science/article/pii/S1353829208001172	10,089 residents of the Netherlands ages 12 and up	Cross-sectional study The relation between the amount of green space, social contacts and health was assessed by multilevel regression analyses, controlling for socio-economic and demographic characteristics and urbanicity.	Significant relation between both the percentage of green in 1 km (p < 0.05) and in 3 km (p < 0.01) radii around people's home and their feelings of loneliness. People with more green space in their living environment feel less lonely.	3.5	+
13	Presence/Proximity	Mental Health Social Benefits	Lee, ACK, Maheswaran, R. (2010). The Health Benefits of Urban Green Spaces: A Review of the Evidence. Journal of Public Health, 33(2), 212-222.	http://jpubhealth.oxfordjournals.org/content/33/2/212.long	Adults, International	Literature review of 34 studies on health effects of green spaces	There are wider nonphysical benefits of urban green space such as impacts on wellbeing and mental health, as well as social inclusion. However, the relationship between green space and urban health is complex and other factors influence the observed associations. Health and urban planners need to be cognizant of this complexity as simplistic interventions may fail to address confounding factors, …	4.5	+
14	Presence/Proximity	Physical Health	Hu, Z, Liebens, J, Rao, KR. (2008). Linking Stroke Mortality with Air Pollution, Income, and Greenness in Northwest Florida: An Ecological Geographical Study, International Journal of Health Geographics, 7:20.	http://www.ij-healthgeographics.com/content/7/1/20	Stroke death count data at the census tract level was obtained from Florida CHARTS website. The data was compiled from Florida Vital Statistics in a 5-year (1998–2002) aggregate.	Ecological study using asymmetric mapping and Bayesian hierarchical modelling for Escamiba and Santa Rosa Counties in northwest Florida. Stroke data was collected at the census tract level.	High risk of stroke mortality was found in areas with low income level, high air pollution level, and low level of exposure to green space.	3.5	+
15	Presence/Proximity	Mental Health	van den Berg, AE, Maas, J, Verheij, RA, Groenewegen, PP. (2010). Green Space as a Buffer between Stressful Life Events and Health. Social Science & Medicine, 70(8), 1203–10.	http://www.sciencedirect.com/science/article/pii/S0277953610000675	4,529 adults (18+) living in Denmark	Cross-sectional study Effects of stressful life events and green space on health outcomes were estimated in the multilevel regression model with age, gender, education level, income, and level of urbanity as covariates. Measures: Stressful life events were assessed using the List of Threatening Experiences (LTE-Q) Number of health complaints experienced in the last 14 days (Foets & Van der Velden…	The negative health impacts of experiencing a stressful life event were generally weaker for respondents with a high amount of green space in a 3-km radius than for respondents with a low amount of green space in this radius. Within the group of respondents who had recently experienced a stressful life event (N = 866), those with a high amount of green space in a 3-km radius reported significantl…	3.5	+
16	Presence/Proximity	Social Benefits	Kweon, BS, Sullivan, WC, Wiley AR. (1998). Green Common Spaces and the Social Integration of Inner-city Older Adults. Environment & Behavior, 30(6), 832–58.	http://eab.sagepub.com/content/30/6/832.abstract	91 older adults, including 11 male and 80 female African Americans, between the ages of 64 and 91 years in Chicago, IL USA	Structured interviews Social integration was measured using a 15-item scale. Factor analysis generated 2 factors: 1) Neighborly Activities (9 items, internal consistency = 0.89) and 2) Friends & Neighbors (internal consistency = 0.72) Sense of local community was measured using a 3-item scale with an internal consistency of 0.76.	Spending time in green outdoor common spaces was systematically related to stronger social integration and a stronger sense of local community. The total amount of variance explained by exposure to green common spaces was 6% for Neighborly Activities and 7% for Friends and Neighbors. The total amount of variation in sense of local community explained by exposure to green common spaces was 5%.	3.5	+
17	Presence/Proximity	Physical Health	Maller, C, Townsend, M, St Leger, L, Henderson-Wilson, C, Pryor, A, Prosser, L, Moore, M. (2008, 2nd Edition). Healthy Parks, Healthy People: The Health Benefits of Contact with Nature in a Park Context: A Review of Relevant Literature. Melbourne, Victoria, Australia: Deakin University and Parks Victoria.	http://parkweb.vic.gov.au/__data/assets/pdf_file/0018/313821/HPHP-deakin-literature-review.pdf	All ages, International	Literature Review An examination of a broad cross-section of published literature that relates to the potential and actual health benefits of contact with nature, particularly but not only, in a park context. # of studies not stated	7 studies indicated that there are some known beneficial physiological effects that occur when humans encounter, observe or otherwise positively interact with animals, plants, landscapes, or wilderness. Evidence Type: Anecdotal, Theoretical, Empirical.	4.5	+
18	Presence/Proximity	Mental Health	Maller, C, Townsend, M, St Leger, L, Henderson-Wilson, C, Pryor, A, Prosser, L, Moore, M. (2008, 2nd Edition). Healthy Parks, Healthy People: The Health Benefits of Contact with Nature in a Park Context: A Review of Relevant Literature. Melbourne, Victoria, Australia: Deakin University and Parks Victoria.	http://parkweb.vic.gov.au/__data/assets/pdf_file/0018/313821/HPHP-deakin-literature-review.pdf	All ages, International	Literature Review An examination of a broad cross-section of published literature that relates to the potential and actual health benefits of contact with nature, particularly but not only, in a park context. # of studies not stated	5 studies showed that natural environments, such as parks, foster recovery from mental fatigue and are restorative. Evidence Type: Anecdotal, Theoretical, Empirical.	4.5	+
19	Programs, promotion, events	Mental Health	Maller, C, Townsend, M, St Leger, L, Henderson-Wilson, C, Pryor, A, Prosser, L, Moore, M. (2008, 2nd Edition). Healthy Parks, Healthy People: The Health Benefits of Contact with Nature in a Park Context: A Review of Relevant Literature. Melbourne, Victoria, Australia: Deakin University and Parks Victoria.	http://parkweb.vic.gov.au/__data/assets/pdf_file/0018/313821/HPHP-deakin-literature-review.pdf	All ages, International	Literature Review An examination of a broad cross-section of published literature that relates to the potential and actual health benefits of contact with nature, particularly but not only, in a park context. # of studies not stated	7 studies found that there are established methods of nature-based therapy (including wilderness, horticultural, and animal-assisted therapy among others) that have success healing patients who previously had not responded to treatment. Evidence Type: Anecdotal, Theoretical, Empirical.	4.5	+
20	Presence/Proximity	Mental Health	Maller, C, Townsend, M, St Leger, L, Henderson-Wilson, C, Pryor, A, Prosser, L, Moore, M. (2008, 2nd Edition). Healthy Parks, Healthy People: The Health Benefits of Contact with Nature in a Park Context: A Review of Relevant Literature. Melbourne, Victoria, Australia: Deakin University and Parks Victoria.	http://parkweb.vic.gov.au/__data/assets/pdf_file/0018/313821/HPHP-deakin-literature-review.pdf	All ages, International	Literature Review An examination of a broad cross-section of published literature that relates to the potential and actual health benefits of contact with nature, particularly but not only, in a park context. # of studies not stated	6 studies found that people have a more positive outlook on life and higher life satisfaction when in proximity to nature (particularly in urban areas). Evidence Type: Anecdotal, Theoretical, Empirical.	4.5	+
21	Presence/Proximity	Mental Health; Physical Health	Maller, C, Townsend, M, St Leger, L, Henderson-Wilson, C, Pryor, A, Prosser, L, Moore, M. (2008, 2nd Edition). Healthy Parks, Healthy People: The Health Benefits of Contact with Nature in a Park Context: A Review of Relevant Literature. Melbourne, Victoria, Australia: Deakin University and Parks Victoria.	http://parkweb.vic.gov.au/__data/assets/pdf_file/0018/313821/HPHP-deakin-literature-review.pdf	All ages, International	Literature Review An examination of a broad cross-section of published literature that relates to the potential and actual health benefits of contact with nature, particularly but not only, in a park context. # of studies not stated	3 studies found that exposure to natural environments, such as parks, enhances the ability to cope with and recover from stress, cope with subsequent stress, and recover from illness and injury. Evidence Type: Anecdotal, Theoretical, Empirical.	4.5	+
22	Presence/Proximity	Mental Health	Maller, C, Townsend, M, St Leger, L, Henderson-Wilson, C, Pryor, A, Prosser, L, Moore, M. (2008, 2nd Edition). Healthy Parks, Healthy People: The Health Benefits of Contact with Nature in a Park Context: A Review of Relevant Literature. Melbourne, Victoria, Australia: Deakin University and Parks Victoria.	http://parkweb.vic.gov.au/__data/assets/pdf_file/0018/313821/HPHP-deakin-literature-review.pdf	All ages, International	Literature Review An examination of a broad cross-section of published literature that relates to the potential and actual health benefits of contact with nature, particularly but not only, in a park context. # of studies not stated	3 studies found that observing nature can restore concentration and improve productivity. Evidence Type: Anecdotal, Theoretical, Empirical.	4.5	+
23	Presence/Proximity	Mental Health; Physical Health	Maller, C, Townsend, M, St Leger, L, Henderson-Wilson, C, Pryor, A, Prosser, L, Moore, M. (2008, 2nd Edition). Healthy Parks, Healthy People: The Health Benefits of Contact with Nature in a Park Context: A Review of Relevant Literature. Melbourne, Victoria, Australia: Deakin University and Parks Victoria.	http://parkweb.vic.gov.au/__data/assets/pdf_file/0018/313821/HPHP-deakin-literature-review.pdf	All ages, International	Literature Review An examination of a broad cross-section of published literature that relates to the potential and actual health benefits of contact with nature, particularly but not only, in a park context. # of studies not stated	6 studies found that people have an innate affiliation with nature that enhances health, and humans rely on nature intellectually, emotionally, physically and spiritually. Evidence Type: Anecdotal, Theoretical.	4.5	+
24	Presence/Proximity	Mental Health	Maller, C, Townsend, M, St Leger, L, Henderson-Wilson, C, Pryor, A, Prosser, L, Moore, M. (2008, 2nd Edition). Healthy Parks, Healthy People: The Health Benefits of Contact with Nature in a Park Context: A Review of Relevant Literature. Melbourne, Victoria, Australia: Deakin University and Parks Victoria.	http://parkweb.vic.gov.au/__data/assets/pdf_file/0018/313821/HPHP-deakin-literature-review.pdf	All ages, International	Literature Review An examination of a broad cross-section of published literature that relates to the potential and actual health benefits of contact with nature, particularly but not only, in a park context. # of studies not stated	8 studies found that separation from nature via modern living is detrimental to human development, health, and wellbeing and that regular contact with nature, such as provided by parks, is required for mental health. Evidence Type: Anecdotal, Theoretical.	4.5	+
25	Presence/Proximity	Mental Health	Maller, C, Townsend, M, St Leger, L, Henderson-Wilson, C, Pryor, A, Prosser, L, Moore, M. (2008, 2nd Edition). Healthy Parks, Healthy People: The Health Benefits of Contact with Nature in a Park Context: A Review of Relevant Literature. Melbourne, Victoria, Australia: Deakin University and Parks Victoria.	http://parkweb.vic.gov.au/__data/assets/pdf_file/0018/313821/HPHP-deakin-literature-review.pdf	All ages, International	Literature Review An examination of a broad cross-section of published literature that relates to the potential and actual health benefits of contact with nature, particularly but not only, in a park context. # of studies not stated	5 studies found that too much artificial stimulation and lack of exposure to natural environments, such as parks, can cause exhaustion and reduce vitality. Evidence Type: Theoretical.	4.5	+
26	Public Gardens	Social Benefits; Injury Prevention (reduced violence)	Maller, C, Townsend, M, St Leger, L, Henderson-Wilson, C, Pryor, A, Prosser, L, Moore, M. (2008, 2nd Edition). Healthy Parks, Healthy People: The Health Benefits of Contact with Nature in a Park Context: A Review of Relevant Literature. Melbourne, Victoria, Australia: Deakin University and Parks Victoria.	http://parkweb.vic.gov.au/__data/assets/pdf_file/0018/313821/HPHP-deakin-literature-review.pdf	All ages, International	Literature Review An examination of a broad cross-section of published literature that relates to the potential and actual health benefits of contact with nature, particularly but not only, in a park context. # of studies not stated	8 studies found that community gardens increase community cohesion, reduce graffiti and violence and enhance self-image of residents.	4.5	+
27	Public Gardens	Social Benefits; Injury Prevention (reduced violence)	Shefte, J. (2014). Community Garden Helps Reduce Crime. KAKE.com. Witchita, Kansas.	http://www.kake.com/community/headlines/Community-Garden-Helps-Reduce-Crime-173865351.html	Community garden at 20th Street North and Shelton in Witchita, KS, USA	News Article	In 2011, the organization Safe Streets Wichita created the planting peace community garden. Garden coordinator, Garry Galstad, says that since that time, graffiti has reduced by about 75% and even gang activity has decreased.	2	+
28	Presence/Proximity	Economics: Real estate profitability	Anderson, ST, West, SE. (2006). Open Space, Residential Property Values, and Spatial Context. Regional Science and Urban Economics, 36, 773-789.	http://www.macalester.edu/~wests/AndersonWestRSUE.pdf	Home transaction data from Minneapolis-St. Paul metropolitan area	Hedonic Analysis	The value of an average home increases with proximity to neighborhood parks, special parks, lakes, and rivers, with benefits ranging from a low of 0.0035% of sales price for every one percent decrease in the distance to the nearest neighborhood park, to a high of 0.0342% for every one percent decrease in the distance to the nearest lake. These effects are statistically significant at or near the …	3.5	+
29	Trails	Economics: Economic performance of cities	Flusche, D. (2012). Bicycling Means Business: The Economic Benefits of Bicycle Infrastructure. Washington, D.C.: Advocacy Advance - a partnership of the League of American Bicyclists and the Alliance for Biking & Walking.	http://www.advocacyadvance.org/site_images/content/Final_Econ_Update(small).pdf	Adults, United States	Advocacy report highlighting the impact the bicycle industry and bicycle tourism can have on state and local economies, discusses the cost effectiveness of investments, points out the benefits of bike facilities for business districts and neighborhoods, and identifies the cost savings associated with a mode shift from car to bicycle.	CASE STUDY Many bike shops have benefited directly from federal investments in bicycling facilities. Moore’s Bicycle Shop in Hattiesburg, MS, for example, saw a dramatic spike in sales when the Longleaf Trace multi-use trail was built using federal Transportation Enhancement funds. “For the first 16 years [of my business] it was a one-man operation with the occasional part-time employee,” wrote J…	2	+
30	Trails	Economics: Economic performance of cities	Great Allegheny Passage (2012). Trail Town Business Survey Report for The Progress Fund. Frostburg Maryland: Center for Regional Progress, College of Business, Frostburg State University.	http://www.atatrail.org/docs/Trail_Town_Business_Survey_Final_Report.pdf	91 businesses in five counties: Allegheny, PA, Westmoreland, PA, Fayette, PA, Somerset, PA, and Allegany, MD	Mailed survey distributed to businesses in five counties that The Great Allegheny Passage runs through. Estimated annual revenues generated from the trail per establishment was computed using reported annual gross revenue values, and the reported percentage of gross revenue from trail use.	On average about 30 percent of gross revenues were attributed to the trail (higher than the 25.5% reported in the 2008-2009 survey). At the county aggregation level, the weighted average annual revenue generated from the trail per establishment was about $650,000. At the firm type aggregation level, the weighted average annual revenues generated from the trail per establishment was $2.1 million.	2	+
31	Trails	Economics: Economic performance of cities	Tomes, PA & Knoch, C. (2009). Schuylkill River Trail 2009 User Survey and Economic Impact Analysis. Camp Hill, PA: Rails-to-Trails Conservancy, Northeast Regional Office.	http://www.railstotrails.org/resources/documents/wherewework/northeast/Schuylkill%20River%20Trail%20Users%20Survey_Final_low%20res.pdf	1,223 adult users of the Schuylkill River Trail	Utilizing Rails-to-Trails Conservancy’s (RTC) “Trail User Survey Workbook” survey form template as a starting point, the survey form was refined with input from the Schuylkill River Heritage Area staff and trail manager. Self-selecting survey forms were available at 21 trailheads along the Schuylkill River Trail from Nov 2008 - Oct 2009.	78 percent of the respondents indicated they had purchased “hard goods” (bikes, bike accessories, clothing, etc.) in the past year in conjunction with their use of the trail. The majority of these purchases were bicycles, bike supplies and footwear that resulted in an average expenditure of $406.31. Fifty percent of the survey respondents indicated they had purchased “soft goods” (water, soda, ca…	2	+
32	Programs, promotion, events	Injury Prevention (Reduced Crime)	Harnik, P & Welle, B. (2011). From Fitness Zones to the Medical Mile: How Urban Park Systems Can Best Promote Health and Wellness. Washington, D.C.: The Trust for Public Land.	http://cloud.tpl.org/pubs/ccpe-health-promoting-parks-rpt.pdf	14 case studies related to six major factors identified that can stimulate public park use.	In April 2008, The Trust for Public Land organized a 2-day colloquium of 22 leading professionals in the fields of public and mental health, parks and recreation, landscape architecture and urban planning. This report is a product of their expert guidance, followed up by additional research and analysis and a search for best practices.	In Kansas City, crime in Kessler park decreased by 74% the year that 2.6 miles of Cliff Drive were turned car-free on weekends.	4	+
33	Programs, promotion, events	Environmental Benefits; Social Benefits	Harnik, P & Welle, B. (2011). From Fitness Zones to the Medical Mile: How Urban Park Systems Can Best Promote Health and Wellness. Washington, D.C.: The Trust for Public Land.	http://cloud.tpl.org/pubs/ccpe-health-promoting-parks-rpt.pdf	14 case studies related to six major factors identified that can stimulate public park use.	In April 2008, The Trust for Public Land organized a 2-day colloquium of 22 leading professionals in the fields of public and mental health, parks and recreation, landscape architecture and urban planning. This report is a product of their expert guidance, followed up by additional research and analysis and a search for best practices.	CASE STUDY Automobile traffic reduces park use. According to careful attendance counts by the San Francisco County Transportation Authority and extrapolations by the Center for City Park Excellence, offering a car-free park road on only one day of the week (Sunday) lures as many as 2.7 million more visitors annually to Golden Gate Park. A calculation by the Center for City Park Excellence indicat…	4	+
34	Design Features	Social Benefits	Harnik, P & Welle, B. (2011). From Fitness Zones to the Medical Mile: How Urban Park Systems Can Best Promote Health and Wellness. Washington, D.C.: The Trust for Public Land.	http://cloud.tpl.org/pubs/ccpe-health-promoting-parks-rpt.pdf	14 case studies related to six major factors identified that can stimulate public park use.	In April 2008, The Trust for Public Land organized a 2-day colloquium of 22 leading professionals in the fields of public and mental health, parks and recreation, landscape architecture and urban planning. This report is a product of their expert guidance, followed up by additional research and analysis and a search for best practices.	CASE STUDY As part of Mayor Michael Bloomberg's PlaNYC 2030 and a three-way partnership between the board of education, the department of parks and recreation and The Trust for Public Land, New York City is rebuilding derelict schoolyards for students and opening them to the full community outside school hours. Each playground renovation begins with an in-depth participatory design phase and incl…	4	+
35	Trails	Economics: Real estate profitability	Harnik, P & Welle, B. (2011). From Fitness Zones to the Medical Mile: How Urban Park Systems Can Best Promote Health and Wellness. Washington, D.C.: The Trust for Public Land.	http://cloud.tpl.org/pubs/ccpe-health-promoting-parks-rpt.pdf	14 case studies related to six major factors identified that can stimulate public park use.	In April 2008, The Trust for Public Land organized a 2-day colloquium of 22 leading professionals in the fields of public and mental health, parks and recreation, landscape architecture and urban planning. This report is a product of their expert guidance, followed up by additional research and analysis and a search for best practices.	CASE STUDY Public investments in the Platte River Greenway, Denver totaling about $70 million has fueled $2.5 billion in residential, commercial, retail, sports and entertainment projects along the corridor.	4	+
36	Presence/Proximity	Mental Health	Hansmann, R, Hug, SM, Seeland, K. (2007). Restoration and Stress Relief through Physical Activities in Forests and Parks. Urban Forestry & Urban Greening, 6(4), 213-225.	http://www.sciencedirect.com/science/article/pii/S1618866707000623	164 adults (71 males, 93 females) in Zurich, Switzerland	A ﬁeld survey assessed the restorative effects of visiting an urban forest and a city park in Zurich, Switzerland. Respondents rated their headaches, level of stress, and how balanced they felt both prior to visiting the outdoor location and at the time of being interviewed.	Suffering from headaches and stress decreased signiﬁcantly, and feeling well-balanced increased signiﬁcantly. The recovery ratio for stress was 87%, and the reduction in headaches was 52%, in terms of the possible improvements on ﬁve-point rating scales. With respect to feeling well-balanced, the observed changes amounted to 40% of the possible enhancement. Positive effects increased with length …	3.5	+
37	Presence/Proximity	Physical Health	National Recreation and Park Association. (2010). Synopsis of 2010 Research Papers: The Key Benefits. Ashburn, VA.	http://www.nrpa.org/uploadedFiles/nrpa.org/Publications_and_Research/Research/Papers/Synopsis-of-Research-Papers.pdf	Summary of five reports	White paper outlining the six main areas about the latest research into the benefits provided by parks: physical health, mental health, social functioning, youth development, environment, and economic impact.	Diabetic individuals taking 30-minute walks in a forest experienced lowered blood glucose levels far more than the same amount of time spent doing physical activity in other settings. The half-hour forest walks resulted in larger drops in blood glucose than three hours of cycling.	4	+
38	Presence/Proximity	Mental Health	National Recreation and Park Association. (2010). Synopsis of 2010 Research Papers: The Key Benefits. Ashburn, VA.	http://www.nrpa.org/uploadedFiles/nrpa.org/Publications_and_Research/Research/Papers/Synopsis-of-Research-Papers.pdf	Summary of five reports	White paper outlining the six main areas about the latest research into the benefits provided by parks: physical health, mental health, social functioning, youth development, environment, and economic impact.	Scientists in the Netherlands examined the prevalence of anxiety disorders in more than 345,000 residents and found that people who lived in residential areas with the least green spaces had a 44 percent higher rate of physician-diagnosed anxiety disorders than people who lived in the greenest residential areas. The effect was strongest among those most likely to spend their time near home, inclu…	4	+
39	Presence/Proximity	Mental Health	National Recreation and Park Association. (2010). Synopsis of 2010 Research Papers: The Key Benefits. Ashburn, VA.	http://www.nrpa.org/uploadedFiles/nrpa.org/Publications_and_Research/Research/Papers/Synopsis-of-Research-Papers.pdf	Summary of five reports	White paper outlining the six main areas about the latest research into the benefits provided by parks: physical health, mental health, social functioning, youth development, environment, and economic impact.	In one study, researchers found that a 20-minute walk in an urban park benefited concentration performance of children with ADHD. The performance boost was at least as large as the peak performance boost shown for two widely prescribed ADHD medications. Researchers aren’t the only ones who have tracked these benefits. In a nationwide survey, parents of kids with ADHD rated after-school activities…	4	+
40	Presence/Proximity	Injury Prevention (Reduced Crime)	National Recreation and Park Association. (2010). Synopsis of 2010 Research Papers: The Key Benefits. Ashburn, VA.	http://www.nrpa.org/uploadedFiles/nrpa.org/Publications_and_Research/Research/Papers/Synopsis-of-Research-Papers.pdf	Summary of five reports	White paper outlining the six main areas about the latest research into the benefits provided by parks: physical health, mental health, social functioning, youth development, environment, and economic impact.	In a study conducted in an inner-city Chicago low-rise apartment development, building with more vegetation were associated with: lower rates of homicide, assault, robbery, theft, burglary, and arson. Buildings with high levels of vegetation had 52 percent fewer total crimes than buildings with low levels of vegetation.	4	+
41	Presence/Proximity	Environmental Benefits	National Recreation and Park Association. (2010). Synopsis of 2010 Research Papers: The Key Benefits. Ashburn, VA.	http://www.nrpa.org/uploadedFiles/nrpa.org/Publications_and_Research/Research/Papers/Synopsis-of-Research-Papers.pdf	Summary of five reports	White paper outlining the six main areas about the latest research into the benefits provided by parks: physical health, mental health, social functioning, youth development, environment, and economic impact.	Urban trees in the lower 48 states are estimated to remove 783,000 tons of pollution per year.	4	+
42	Trails	Economics (Real Estate Profitability)	Lindsey, G, Man, J, Payton, S & Dickson, K. (2004). Property Values, Recreation Values, and Urban Greenways. Journal of Park and Recreation Administration, 22(3), 69-90.	http://staff.washington.edu/kwolf/Archive/Classes/ESRM304_SocSci/304%20Soc%20Sci%20Lab%20Articles/Lindsey_2004.pdf	Indianapolis/Marion County, Indiana, the 12th largest city by population (860,454) in the United States. Marion County occupies 396 square miles, has 352,164 households, and a median household income of $40,421.	Impacts of greenways on property values in Indianapolis, Indiana were measured with geographic information systems (GIS) and hedonic price modeling using residential real estate sales data from 1999. Recreation values are measured for a greenway trail in Indianapolis with the travel cost method using data from a 2000 survey of trail users and counts of trail traffic taken in 1996.	The average selling price for homes within a half-mile of Indiana’s Monon Trail was 11% higher than homes farther away.	3.5	+
43	Presence/Proximity	Mental Health	Alcock, I, White, MP, Wheeler, BW, Fleming, LE & Depledge, MH. (2014). Longitudinal Effects on Mental Health of Moving to Greener and Less Green Urban Areas. Environmental Science & Technology, 48(2), 1247–1255.	http://pubs.acs.org/doi/abs/10.1021/es403688w	The samples were participants in the British Household Panel Survey (BHPS) with mental health data (General Health Questionnaire scores) for ﬁve consecutive years, and who relocated to a diﬀerent residential area between the second and third years. The BHPS is a nationally representative longitudinal survey of over 5000 UK households that ran annually from 1991 - 2008. Inclusion criteria resulted…	Mental health was measured with the short-form twelve item General Health Questionnaire. Two categories of individual were identified: (a) those who relocated to greener areas, and (b) those who relocated to less green areas, and mental health of these groups was examined before and after their moves. Fixed-eﬀects analyses controlled for time-invariant individual level heterogeneity and other are…	Compared to premove mental health scores, individuals who moved to greener areas (n = 594) had significantly better mental health in all three postmove years (P = .015; P = .016; P = .008), supporting a “shifting baseline” hypothesis. Individuals who moved to less green areas (n = 470) showed significantly worse mental health in the year preceding the move (P = .031) but returned to baseline in t…	3.5	+
44	Presence/Proximity	Environmental Benefits	Nowak, DJ, Heisler, GM. (2010). Air Quality Effects of Urban Trees and Parks. Ashburn, VA: National Recreation and Park Association.	http://www.nrpa.org/uploadedFiles/nrpa.org/Publications_and_Research/Research/Papers/Nowak-Heisler-Research-Paper.pdf	Tree resources in US cities	Monograph written by two expert researchers that explores how trees in cities, particularly in park settings, can improve air quality. The paper discusses the current tree resources in cities in the United States, why each attribute of air quality is important to local residents, and how trees and parks can improve air quality in our cities.	AIR TEMPERATURE REDUCTION: Parks generally have lower air temperatures than surrounding areas. Temperatures are usually cooler toward the center of a park than around its edges. At night, the center of a large park may be 13°F (7°C) cooler than surrounding city areas. Cooler air temperatures provided by urban parks can have significant impacts on human health. During heat wave events, which can k…	4	+
45	Presence/Proximity	Environmental Benefits; Economics (Land Value)	Nowak, DJ, Heisler, GM. (2010). Air Quality Effects of Urban Trees and Parks. Ashburn, VA: National Recreation and Park Association.	http://www.nrpa.org/uploadedFiles/nrpa.org/Publications_and_Research/Research/Papers/Nowak-Heisler-Research-Paper.pdf	Tree resources in US cities	Monograph written by two expert researchers that explores how trees in cities, particularly in park settings, can improve air quality. The paper discusses the current tree resources in cities in the United States, why each attribute of air quality is important to local residents, and how trees and parks can improve air quality in our cities.	AIR POLLUTION REDUCTION: Annual pollution removal and economic benefits by U.S. urban park trees is estimated at about: 75,000 tons ($500 million) or 80 pounds per acre of tree cover ($300 per acre of tree cover).	4	+
46	Presence/Proximity	Physical Health	Nowak, DJ, Heisler, GM. (2010). Air Quality Effects of Urban Trees and Parks. Ashburn, VA: National Recreation and Park Association.	http://www.nrpa.org/uploadedFiles/nrpa.org/Publications_and_Research/Research/Papers/Nowak-Heisler-Research-Paper.pdf	Tree resources in US cities	Monograph written by two expert researchers that explores how trees in cities, particularly in park settings, can improve air quality. The paper discusses the current tree resources in cities in the United States, why each attribute of air quality is important to local residents, and how trees and parks can improve air quality in our cities.	ULTRAVIOLET RADIATION REDUCTION: Park trees can shield people from ultraviolet (UV) radiation, as tree leaves absorb about 95% of UV radiation. The reduction in UV exposure to park visitors is important because excess exposure to UV is the cause or contributing factor for three types of skin cancer, and UV radiation is also blamed for contributing to cataracts of the eye.	4	+
47	Presence/Proximity	Environmental Benefits	Nowak, DJ, Heisler, GM. (2010). Air Quality Effects of Urban Trees and Parks. Ashburn, VA: National Recreation and Park Association.	http://www.nrpa.org/uploadedFiles/nrpa.org/Publications_and_Research/Research/Papers/Nowak-Heisler-Research-Paper.pdf	Tree resources in US cities	Monograph written by two expert researchers that explores how trees in cities, particularly in park settings, can improve air quality. The paper discusses the current tree resources in cities in the United States, why each attribute of air quality is important to local residents, and how trees and parks can improve air quality in our cities.	CARBON DIOXIDE REDUCTION: Carbon storage and annual removal by urban park trees and soils in the United States is estimated at about: Carbon storage (trees): 75 million tons ($1.6 billion), Carbon storage (soils): 102 million tons of carbon ($2.1 billion), Annual carbon removal (trees): 2.4 million tons ($50 million). On a per acre basis, carbon effects for U.S. parks are estimated to be: Carbon …	4	+
48	Park Incivilities / Civilities	Injury Prevention (Perceived Safety)	Muderrisoglu, H & Demir, Z. (2004). The Relationship Between Perceived Beauty and Safety in Urban Recreation Parks. Journal of Applied Sciences, 4: 72-77.	http://scialert.net/qredirect.php?doi=jas.2004.72.77&linkid=pdf	105 students from Istanbul University	Twenty-one slides (7 slides/park) from three urban recreation parks in different locations of Istanbul were evaluated by Istanbul University students for perceived security, scenic quality, or both. The aims of this study were to determine whether judgments of personal safety in urban recreation parks show sufficient reliability to be usefully studied, to use such judgments to identify park desig…	The common effect that increases both perceived beauty and security is large grass fields and long view distances. The most detracting factors from perceived beauty and safety are litter and maintenance problems.	3.5	+
49	Presence/Proximity; Design features (size)	Social benefits (quality of life)	Sarmiento, OL, Schmid, TL, Parra, DC, Dias-del-Castillo, A, Fernando Gomez, L, Pratt, M, et al. (2010). Quality of Life, Physical Activity, and Built Environment Characteristics among Colombian Adults. Journal of Physical Activity and Health, 7(Suppl 2), S181-S195.	http://journals.humankinetics.com/jpah-back-issues/jpah-volume-7-supplement-july/quality-of-life-physical-activity-and-built-environment-characteristics-among-colombian-adults	1,334 adults from Bogota	Cross-sectional study using validated instruments and questionnaires and statistical analysis to assess associations between health-related quality of life, physical activity and built environment	Adults who live in blocks with higher density of parks and higher average size of parks were more likely to have higher mean scores of quality of life. Compared with adults living in blocks within the lowest tertile of park density, and average park size, those living in blocks within the highest tertile were more likely to have higher mean scores of HR-QOL ([park density = low tertile [90.04] vs…	3.5	+
50	Presence/Proximity; Design features (size)	Physical health	Sarmiento, OL, Schmid, TL, Parra, DC, Dias-del-Castillo, A, Fernando Gomez, L, Pratt, M, et al. (2010). Quality of Life, Physical Activity, and Built Environment Characteristics among Colombian Adults. Journal of Physical Activity and Health, 7(Suppl 2), S181-S195.	http://journals.humankinetics.com/jpah-back-issues/jpah-volume-7-supplement-july/quality-of-life-physical-activity-and-built-environment-characteristics-among-colombian-adults	1,334 adults from Bogota	Cross-sectional study using validated instruments and questionnaires and statistical analysis to assess associations between health-related quality of life, physical activity and built environment	Compared with adults living in blocks within the lowest tertile of average park size, those living in blocks within the highest tertile were more likely to perceive their health status as good or excellent (park size= low tertile [55.50] vs. medium tertile [65.78], P = .002, and low tertile [55.50] vs. high tertile [65.20], P = .002).	3.5	+
51	Presence/proximity (existence of green space)	Environmental benefits	BoP Consulting. (2013). Green Space: The Benefits for London. London: City of London Corporation.	http://www.cityoflondon.gov.uk/business/economic-research-and-information/research-publications/Documents/research-2013/Green-Spaces-The-Benefits-for-London.pdf	All ages, London, England	Literature review (non systematic)	Lower surface temperatures in green spaces. Less rainwater run-off. Improved air quality. Improved carbon capture. Improved bio-diversity.	2	+
52	Presence/proximity (existence of green space)	Mental health (well-being)	BoP Consulting. (2013). Green Space: The Benefits for London. London: City of London Corporation.	http://www.cityoflondon.gov.uk/business/economic-research-and-information/research-publications/Documents/research-2013/Green-Spaces-The-Benefits-for-London.pdf	All ages, London, England	Literature review (non systematic)	Green spaces associated with greater wellbeing and mental health and cognitive function. Strong body of evidence which suggests that physical activity in green spaces has stronger mental health benefits than physical activity in non-green spaces, and that “more passive forms of usage” can also have a beneficial impact on mental well-being and cognitive function.	2	+
53	Presence/proximity (existence of green space)	Social benefits	BoP Consulting. (2013). Green Space: The Benefits for London. London: City of London Corporation.	http://www.cityoflondon.gov.uk/business/economic-research-and-information/research-publications/Documents/research-2013/Green-Spaces-The-Benefits-for-London.pdf	All ages, London, England	Literature review (non systematic)	Enhanced cognitive and motor skills and socialisation for children via spaces for play and challenge. Greater social interaction and community cohesion through inclusive, free space. Children playing in green spaces displayed higher levels of creative play, played for longer, and more collaboratively than children playing in built-up spaces. These findings are supported by a 2000 Norwegian study,…	2	+
54	Presence/proximity (existence of green space)	Economic benefits	BoP Consulting. (2013). Green Space: The Benefits for London. London: City of London Corporation.	http://www.cityoflondon.gov.uk/business/economic-research-and-information/research-publications/Documents/research-2013/Green-Spaces-The-Benefits-for-London.pdf	All ages, London, England	Literature review (non systematic)	Cost savings for government related to environment and health expenditures. Increasing property and land value for home owners. Promoting tourism by motivating visits. Attracting businesses to locate Natural England estimated that if the whole English population had equally easy access to green spaces, and consequently all were 24% more likely to be physically active, the life-cost averted saving…	2	+
55	Presence/proximity (existence of green space)	Mental health	Kings Fund. Time to Think Differently Web site. Parks and Green Spaces. http://www.kingsfund.org.uk/time-to-think-differently/trends/broader-determinants-health/parks-and-green-spaces. Accessed January 2014.	http://www.kingsfund.org.uk/time-to-think-differently/trends/broader-determinants-health/parks-and-green-spaces	All ages, England	Literature review (non systematic)	There is strong evidence that access to green spaces improves mental health, although the evidence that it increases physical activity is less strong. Use of green spaces is associated with: a decrease in health complaints, improved blood pressure and cholesterol levels, reduced stress, improved general health perceptions and a greater ability to face problems. Sixty-three per cent of people in s…	2	+
56	Presence/proximity (Physical activity in outdoor natural environments)	Mental health	Thompson Coon J, Boddy K, Stein K, Whear, R, Barton J, & Depledge, MH. (2011). Does Participating in Physical Activity in Outdoor Natural Environments Have a Greater Effect on Physical and Mental Wellbeing than Physical Activity Indoors? A Systematic Review. Environmental Science & Technology, 45 (5), 1761–1772.	http://pubs.acs.org/doi/full/10.1021/es102947t#showRef	Adults and children. Eleven trials (833 adults) included	Systematic review	Compared with exercising indoors, exercising in natural environments was associated with greater feelings of revitalization and positive engagement, decreases in tension, confusion, anger, and depression, and increased energy. However, the results suggested that feelings of calmness may be decreased following outdoor exercise. Participants reported greater enjoyment and satisfaction with outdoor …	4.5	+
57	Presence/proximity (existence of green space)	Physical health; Disparities (inequalities between black and minority ethnic communities)	Commission for Architecture and the Built Environment. (2010). Community Green: Using Green Space to Tackle Inequality and Improve Health. London: Commission for Architecture and the Built Environment.	http://www.openspace.eca.ac.uk/pdf/appendixf/OPENspacewebsite_APPENDIX_F_resource_2.pdf	Survey of 523 people	45 minute face to face facilitated interviews with 523 people . (22% white British, 22% Pakistani, 17 % Bangladeshi, (12%) Black African/Caribbean. Plus a literature review of 150+ publications and case studies on projects engaging people with their local green space	Access to green space contributed 10% towards what made an area a good place to live. Access to green space is a basic and consistent factor regardless of who or where you live. Green space can improve people's health but much green space remains unused due to fear of safety and this fear is greater amongst BME communities contributing 16% towards making an area a good place to live. Local people…	2	-
58	Presence/proximity (existence of green space); Design features	Social benefits	District Councils' Network. (2013). District Action on Public Health: How District Councils Contribute Towards the New Health and Wellbeing Agenda in Local Government. London: District Councils' Network.	http://districtcouncils.info/files/2013/02/District-Action-on-Public-Health.pdf	All population groups	guidance document	The provision of parks, public spaces and allotments by district councils also help residents improve their health and wellbeing. Access to quality green space provides physical and mental health benefits, social interaction and integration, and space for physical activity and play. Districts work with partners including town and parish councils, to provide a range of sports fields, play areas, a…	2	+
59	Presence/proximity (existence of urban parks)	Mental health (Reduction of stress)	Konijnendijk, CC, Annerstedt, M, Nielsen, AB, & Maruthaveeran. (2013). Benefits of Urban Parks. A Systematic Review. A Report for IFPRA. Copenhagen and Alnarp: International Federation of Park and Recreation Administration.	http://www.academia.edu/3431250/Benefits_of_Urban_Parks_A_Systematic_Review_of_the_Evidence	All population groups	Systematic review of selected peer-reviewed literature.	Reduced stress. Although several studies are addressing this outcome the evidence is only moderate.	4	+
60	Presence/proximity (existence of urban parks)	Physical health; Mental health	Konijnendijk, CC, Annerstedt, M, Nielsen, AB, & Maruthaveeran. (2013). Benefits of Urban Parks. A Systematic Review. A Report for IFPRA. Copenhagen and Alnarp: International Federation of Park and Recreation Administration.	http://www.academia.edu/3431250/Benefits_of_Urban_Parks_A_Systematic_Review_of_the_Evidence	All population groups	Systematic review of selected peer-reviewed literature.	Improved self-reported health and mental health. The evidence for these aspects is moderate.	4	+
61	Presence/proximity (existence of urban parks)	Mental health (psychological wellbeing); Social benefits (social support)	Konijnendijk, CC, Annerstedt, M, Nielsen, AB, & Maruthaveeran. (2013). Benefits of Urban Parks. A Systematic Review. A Report for IFPRA. Copenhagen and Alnarp: International Federation of Park and Recreation Administration.	http://www.academia.edu/3431250/Benefits_of_Urban_Parks_A_Systematic_Review_of_the_Evidence	All population groups	Systematic review of selected peer-reviewed literature.	Opportunities for recreation, psychological wellbeing, and social support. For these indirect outcomes the evidence is weak to moderate.	4	weak +
62	Presence/proximity (existence of urban parks)	Environmental benefits	Konijnendijk, CC, Annerstedt, M, Nielsen, AB, & Maruthaveeran. (2013). Benefits of Urban Parks. A Systematic Review. A Report for IFPRA. Copenhagen and Alnarp: International Federation of Park and Recreation Administration.	http://www.academia.edu/3431250/Benefits_of_Urban_Parks_A_Systematic_Review_of_the_Evidence	All population groups	Systematic review of selected peer-reviewed literature.	Reduced noise and cooling, and increased longevity. The current evidence is moderate, but not enough controlled studies are made on the topic, why more research on these effects is needed before any certain conclusions can be drawn.	4	0
63	Presence/proximity (existence of urban parks)	Social benefits (cohesion)	Konijnendijk, CC, Annerstedt, M, Nielsen, AB, & Maruthaveeran. (2013). Benefits of Urban Parks. A Systematic Review. A Report for IFPRA. Copenhagen and Alnarp: International Federation of Park and Recreation Administration.	http://www.academia.edu/3431250/Benefits_of_Urban_Parks_A_Systematic_Review_of_the_Evidence	All population groups	Systematic review of selected peer-reviewed literature.	There are some indications that parks promote social cohesion, but the strength of the evidence is weak due to the very small number of studies as well as the quality of those studies found.	4	0
64	Presence/proximity (existence of urban parks)	Economic (economic performace of cities, tourism)	Konijnendijk, CC, Annerstedt, M, Nielsen, AB, & Maruthaveeran. (2013). Benefits of Urban Parks. A Systematic Review. A Report for IFPRA. Copenhagen and Alnarp: International Federation of Park and Recreation Administration.	http://www.academia.edu/3431250/Benefits_of_Urban_Parks_A_Systematic_Review_of_the_Evidence	All population groups	Systematic review of selected peer-reviewed literature.	There are some indications that parks have touristic benefits, but the strength of the evidence is weak, due to the very small number of studies as well as the quality of those studies found.	4	0
65	Presence/proximity (existence of urban parks)	Economic (land value)	Konijnendijk, CC, Annerstedt, M, Nielsen, AB, & Maruthaveeran. (2013). Benefits of Urban Parks. A Systematic Review. A Report for IFPRA. Copenhagen and Alnarp: International Federation of Park and Recreation Administration.	http://www.academia.edu/3431250/Benefits_of_Urban_Parks_A_Systematic_Review_of_the_Evidence	All population groups	Systematic review of selected peer-reviewed literature.	Moderate to strong evidence that urban parks have a positive impact on the value of nearby property (houses, apartments, land), although it is important to keep the limitations of the hedonic pricing methods – applied in the large majority of the studies - in mind.	4	+

## Sheet: Urban Design, Land Use
URBAN DESIGN / LAND USE
RESOURCE #	FEATURE	CO-BENEFIT	RESOURCE	LINK	SAMPLE CHARACTERISTICS	METHODS	FINDINGS	GRADING THE EVIDENCE	DIRECTION OF ASSOCIATION
1	Greenery	Mental health	White P et al. (2013). Would You Be Happier Living in a Greener Urban Area? A Fixed-Effects Analysis of Panel Data. Psychological Science, published online 23 April 2013, DOI: 10.1177/0956797612464659	http://pss.sagepub.com/content/24/6/920	N=10,000 UK households	longitudinal survey	individuals reported less mental distress and higher life satisfaction when they were living in greener areas.	3.5	+
2	Density	Economic (market demand)	Nelson AC. (n.d.). The New California Dream: How Demographic and Economic Trends May Shape the Housing Market: A Land Use Scenario for 2020 and 2035. Urban Land Institute White Paper.	http://la.uli.org/uli-in-action/housing/the-new-california-dream-new-report/	Los Angeles; San Francisco-San Jose; San Diego; Sacramento	Survey; modeling	Five Main Findings: 1. The existing supply of conventional-lot (over one-eighth acre), single-family detached homes exceeds the projected demand for these homes in 2035. This means that overall the expansion of the supply of conventional-lot, single-family detached homes would be in excess of current and projected demand. 2. Housing and neighborhood preference surveys indicate that Californians c…	2	0
3	Density; Mixed use; Accessibility and connectivity	Economic (market demand)	Carnoske C et al. (2010). Developer and Realtor Perspectives on Factors That Influence Development, Sale, and Perceived Demand for Activity-Friendly Communities. J Phys Act Health, 7(0 1): S48–S59.	http://www.ncbi.nlm.nih.gov/pmc/articles/PMC3718394/	members of National Home Builders Association and National Association of Realtors (N=4950 realtors and 162 builders)	survey of developers and realtors	Realtors believed that homebuyers continue to rank affordability, safety and school quality higher than TND amenities. Developers reported numerous barriers to TNDs, including the inability to overcome governmental/political hurdles, lack of cooperation between government agencies, and lack of market demand. Yet, realtors believed clients are increasingly influenced by gas and oil prices, and dev…	3.5	+
4	Greenery	Environmental (air quality)	Tallis M, Taylor G, Sinnett D and Freer-Smith P (2011) Estimating the removal of atmospheric particulate pollution by the urban tree canopy of London, under current and future environments. Landscape and Urban Planning 103: 129-138.	http://www.sciencedirect.com/science/article/pii/S0169204611002349	Greater London metro area	A modelling approach was used based on the Urban Forest Effects Model (UFORE) and a modified version	Depending on the modelling approach, the urban canopy of the GLA is currently estimated to remove between 852 and 2121 tonnes of PM10 annually; representing between 0.7% and 1.4% of PM10 from the urban boundary layer. Estimates of PM10 removal which take into account a planned increased in tree cover, from the current 20% to 30% of the GLA land area, suggest deposition of 1109–2379 tonnes (1.1–2.…	3.5	+
5	Greenery	mental health	Alcock I et al. (2013). Longitudinal Effects on Mental Health of Moving to Greener and Less Green Urban Areas. Environmental Science & Technology. DOI: 10.1021/es403688w	http://pubs.acs.org/doi/abs/10.1021/es403688w	N=1000 UK households	six-year national longitudinal survey	People who lived in proximity to natural space had significantly improved mental health up to three years after their move. Compared to premove mental health scores, individuals who moved to greener areas (n = 594) had significantly better mental health in all three postmove years (P = .015; P = .016; P = .008), supporting a “shifting baseline” hypothesis. Individuals who moved to less green area…	3.5	+
6	Mixed use; Accessibility and connectivity	Physical health	Bray R, Vakil C, Elliott D. (2005). Report on Public Health and Urban Sprawl in Ontario - A review of the pertinent literature. Environmental Health Committee, Ontario College of Family Physicians.	http://ocfp.on.ca/docs/publications/urbansprawl.pdf	Canada	report with review of studies	This review reminds us of the link between sprawl and the prevalence of diabetes, cardiovascular disease and obesity due to lack of exercise, and cardiovascular and respiratory disease, including asthma, related to air pollution. The elderly and disabled are further disadvantaged (Jackson et al, CDC, www.sprawlwatch.org). In all, lack of physical access in a community becomes a factor leading to …	4	+
7	Mixed use	Social benefits (social capital)	From Bray et al. review: Frumkin, H., (2003). “Healthy Places: Exploring the Evidence”. Am. J. Pub. Health, 93, (9), pp 1451 – 1456		United States		social capital is eroded by long commutes that rob a person of time for recreation, voluntary associations, civic engagements and self care.	3.5	+
8	Mixed use	Social benefits (social capital)	From Bray et al. review: Leyden K. Social capital and the built environment: The importance of walkable neighborhoods. American Journal of Public Health 2003;93: 1546-51.		Galway, Ireland		walkable (pedestrian-oriented), mixed-use neighbourhood designs can encourage the development of social capital, by enhanced levels of community and social engagement	3.5	+
9	Accessibility and connectivity	Physical health	Sturm R, Cohen DA. (2004). Suburban sprawl and physical and mental health. Public Health, 118 (7): 488–496.	http://www.sciencedirect.com/science/article/pii/S0033350604000526	N=8686 US adults;	Survey, cross sectional.	Sprawl significantly predicts chronic medical conditions and health-related quality of life, but not mental health disorders. An increase in sprawl from one standard deviation less to one standard deviation more than average implies 96 more chronic medical problems per 1000 residents, which is approximately similar to an aging of the population of 4 years.	3.5	+
10	Accessibility and connectivity	Physical health	Ewing R, Kreutzer R. Understanding the Relationship between Public Health and the Built Environment. LEED-ND Core Committee Report. May 2006.	http://www.cnu.org/sites/www.cnu.org/files/leed_public_health.pdf	United States	selective review for report; no methodology provided	This report presents an appraisal of the current state of the research regarding the links between public health and neighborhood design and provides recommendations about how this knowledge can be integrated into the LEED-ND rating system to improve public health.	4	0
11	Mixed use; Street-scale pedestrian design	Social benefits (Sense of community)	From LEED-ND Core Committee Report: Lund H. citation not provided.		Portland, OR		The strongest predictors of a sense of community were having positive attitudes toward walking, the perception of opportunities for social interaction, and having a safe and interesting walking environment. Also the number of destination walking trips were not correlated with “sense of community” but the number of strolling, or recreational trips were. The traditional neighborhood had higher meas…	4	+
12	Greenery	Social benefits (social capital)	From LEED-ND Core Committee Report: citation not provided		Maryland		One study of populations in suburban Maryland compared two analogous communities, one with a traditional pattern (Greenbelt) the other with a conventional, sprawling pattern (Hyattsville). Study results found that the satisfaction and sense of community were both significantly higher in Greenbelt. Both factors were positively related to the ability to get around without a car.	4	+
13	Density; Mixed use; Accessibility and connectivity	Social benefits (social ties)	From LEED-ND Core Committee Report: Freeman, Lance. “The Effects of Sprawl on Neighborhood Ties: An Explanatory Analysis.”American Planning Association Journal, Vol. 67 No.1 2001 Pages 69-77.	http://www.tandfonline.com/doi/abs/10.1080/01944360108976356#.UzMJK_ldXD4	adults in Atlanta, Boston, and Los Angeles, United States	cross-sectional survey of adults in Atlanta, Boston, and Los Angeles and from the 1990 decennial census	every 1 percent increase in the proportion of individuals driving to work in a neighborhood is associated with a 73 percent decrease in the odds of any individual having a neighborhood social tie and a 71 percent decrease in any individual having more ties.	3.5	+
14	Density; Mixed use; Accessibility and connectivity	Social benefits (social capital)	Putnam, Robert D. Bowling Alone: The Collapse and Revival of America Community. Simon & Schuster. New York. 2000.		United States		Time spent alone in cars translates directly into a loss of social capital. According to Putnam: “each additional ten minutes spent in daily commuting time cuts involvement in community affairs by 10 percent” (italics original). Using DDBNeedham Life Style, Roper Social and Political Trends and the American’s Use of Time Survey and controlling for demographic variables, Putnam finds that time spe…	3	+
15	Density; Mixed use; Accessibility and connectivity	Environmental benefits (Vehicle emissions)	From LEED-ND Core Committee Report: Frank, Lawrence D., Brian Stone Jr., William Bachman. “ Linking Land Use with Household Vehicle Emissions in the Central Puget Sound: Methodological Framework and Findings”. Transportation Research Part D 5;2000:173-196.	http://www.sciencedirect.com/science/article/pii/S1361920999000322	N=1700 households, Puget Sound, Seattle, WA.	cross-sectional study	relationship between household and employment density, land use mix, street connectivity and commute length to household vehicle emissions for CO, NOx and VOC. In a straight data analysis, the researchers found that emissions of all three pollutants consistently decreased as household density increased. In particular, emissions decreased at an accelerated rate as workplace density increases. Fina…	3.5	+
16	Density; Mixed use; Accessibility and connectivity	Physical health (obesity)	Papas M et al. The Built Environment and Obesity. A Review. Epidemiology Review, 29:129-143.	http://epirev.oxfordjournals.org/content/29/1/129.full	20 English language articles from United States, Australia, and Europe	systematic review	Most articles (84%) reported a statistically significant positive association between some aspect of the built environment and obesity (see below)	4.5	+
17	Density; Mixed use; Accessibility and connectivity	Physical health (BMI)	From Papas et al. review: Ewing R et al. (2003). Relationship between Urban Sprawl and Physical Activity, Obesity, and Morbidity. American Journal of Health Promotion, 18:47-57.	http://www.ncbi.nlm.nih.gov/pubmed/13677962	N=206,992 from 448 US counties and N=175,609 from 83 US metro areas	cross-sectional study	County level, but not metropolitan level, sprawl index was association with BMI and risk of obesity. This association was partially mediated through the number of minutes walked in the past month.	3.5	+
18	Density; Mixed use; Accessibility and connectivity	Physical health (BMI)	From Papas et al. review: Lopez R. (2004). Urban Sprawl and Risk for Being Overweight or Obese. American Journal of Public Health, 94:1574-1579.	http://www.ncbi.nlm.nih.gov/pmc/articles/PMC1448496/	N=104,084 United States adults	cross-sectional study	after adjusting for sociodemographic characteristics (age, race, income, etc), urban sprawl was significantly related with overweight (RR=1.02) and obesity (RR=1.02).	3.5	+
19	Density; Accessibility and connectivity	Physical health (BMI)	From Papas et al. review: Nelson MC, Gordon-Larsen P, Song Y, et al. (2006). Built and Social Environments Associations with Adolescents Overweight and Activity. American Journal of Preventive Medicine, 31(2), 109-117.	http://www.ncbi.nlm.nih.gov/pubmed/16829327	N=20,745 United States adolescents	cross-sectional study	after adjusting for sociodemographic characteristics (age, race, income, etc), persons living in rural working class, exurban, and mixed race/ethnicity urban neighborhoods were more likely to be overweight (RRs=1.4, 1.3, and 1.3, respectively) than were persons living in new suburban neighborhoods.	3.5	+
20	Greenery	Environmental benefits; Mental health; Social benefits	Haq SMA. Urban green spaces and an integrative approach to sustainable environment. J Env Prot 2011;2:601-608.	doi:10.4236/jep.2011.25069	international; # of studies not reported	opinion/position piece based on selective review	Urban green spaces fulfil many functions in urban con-text that benefits people’s quality of life. There is there-fore a broad consensus about the importance and value of urban green spaces in cities towards planning and con-structing sustainable or eco-cities of 21st century. Stead-ily growing traffic and urban heat, especially in the de-veloping countries is not only damaging the environment bu…	4	+
21	Greenery	Environmental benefits (pollution control)	From review by Haq SMA: Bolund, P., Sven, H. (1999). Ecological Services in Urban Areas. Ecological Economics, 29:293-301.	http://www.sciencedirect.com/science/article/pii/S0921800999000130	international; # of studies not reported	selective review of examples of urban ecological services; attention is on direct and locally generated services relevant for Stockholm	On average, 85% of air polluation in a park can be filtered.	4	+
22	Greenery (Tree cover)	Environmental benefits (energy savings)	From review by Haq SMA: M. Sorensen, J. Smit, V. Barzetti and J. Williams, “Good Practices for Urban Greening,” Inter-American Develop-ment Bank, 1997.	http://www.iadb.org/sds/doc/ENV109KKeipiE.pdf.	international; # of studies not reported	position paper	In Chicago, increasing tree cover in the city by 10% may reduce the total energy for heating and cooling by 5 to 10%.	4	+
23	Greenery	Physical health	From review by Haq SMA: P. Bolund, H. Sven. (1999). Ecological Services in Urban Areas. Ecological Economics, 29:293-301.	http://www.sciencedirect.com/science/article/pii/S0921800999000130	interntional; # of studies not reported	selective review of examples of urban ecological services; attention is on direct and locally generated services relevant for Stockholm	patients in hospital rooms facing a park had a 10% faster recovery and needed 50% less strong pain medication compared to patients whose rooms faced a building wall.	4	+
24	Street-scale pedestrian design	Physical health; Environmental benefits	Bidwell S. (2012). Review of Studies that have Quantified the Economic Benefits of Interventions to Increase Walking and Cycling for Transport. New Zealand: Canterbury District Health Board.	http://www.cph.co.nz/Files/QuantEconBenefitPhysicalActive.pdf	peer reviewed studies; government reports; other studies. N not reported. International.	review	The final conclusion of this review was that investment in infrastructure to increase walking and cycling was likely to be a “best buy” for population health, for the health system, as well as for the transport sector.	4	+
25	Street-scale pedestrian design	Physical Health; Environmental benefits; Economics: Economic performance of cities	From Bidwell S. review: Guo JY, Gandavarapu S. (2010). An Economic Evaluation of Health-Promotive Built Environment Changes. Journal of Preventive Medicine, 50(Suppl 1): S440-S449.	http://www.sciencedirect.com/science/article/pii/S0091743509004769	Dane County, Wis. N = 4974)	Developed analysis framework to estimate the best value in hypothetical built environment changes using survey, census, and other data on road networks and bike/ped facilities.	Over ten years, the total construction costs of the sidewalks was estimated to be $45.8 million, against a combined health and air quality benefit of $845.85 million in 2002 dollars, giving a benefit to cost ratio of 1.87.	3.5	+
26	Density; Greenery	Economics: Health care costs	From Bidwell S. review: Boarnet MG, Greenwalk M, McMillan TE. (2008). Walking, Urban Design, and Health: Towards a Cost-Benefit Analysis Framework. Journal of Planning Education and Research, 27(3): 341-358.	http://jpe.sagepub.com/content/27/3/341.abstract	geocoded travel diary data from Portland, OR. N not reported.	complex modeling to predict impact of infrastructure changes on walking, based on travel diary data	Complex calculations showed benefits ranging from $2 million to $24 million depending on the type of design change, different estimates of the number of more active people, and the distances walked.	3.5	+
27	Density; Mixed use; Accessibility and connectivity (Walkable shopping areas)	economic	Hack, G. (2013). Business Performance in Walkable Shopping Areas. Princeton, NJ: Active Living Research, a National Program of the Robert Wood Johnson Foundation.	http://activelivingresearch.org/business-performance-walkable-shopping-areas	N=70 peer reviewed studies and case studies of 15 locales in United States	a meta-analysis of 70 studies and articles, plus an exploratory study of 15 walkable shopping areas judged as successful to examine the sources of success.	Overall Conclusions: There is great enthusiasm for walkable shopping areas among retail experts, developers and many residents of urban and suburban areas. Walking shopping areas have a potential to prosper as a result of demographics, increased gas prices, public policies encouraging higher densities and changing life style preferences. Businesses can be successful if such areas reach a critical…	4.5	+
28	Street-scale pedestrian design	economic	From Gary Hack ALR report: Boarnet, MG, Joh, K, Siembab, W, Fulton, W, & Nguyen, MT. (2011). Retrofitting the Suburbs to Increase Walking: Evidence from a Land-use-Travel Study. Urban Studies, 48(1), 129-159.	http://usj.sagepub.com/content/48/1/129	N=2125 Los Angeles County adults	cross sectional survey	In 1995, the City of West Palm Beach Florida made major investments in traffic calming and pedestrian realm improvements along Clematis Street, its traditional main street, including restoring the street to two-way movements. Improvements extended into the adjacent neighborhoods, making them more pedestrian-friendly, encouraging residents to walk to Clematis Street. Property values have doubled a…	3.5	+
29	Mixed use	economic	From Gary Hack ALR report: Pivo, G & Fisher, JD. (2010). The Walkability Premium in Commercial Real Estate Investments. Working Paper. Responsible Property Investing Center, University of Arizona and Benecki Center for Real Estate Studies, Indiana University.	Available at: http://www.u.arizona.edu/~gpivo/Walkability%20Paper%208_4%20draft.pdf	26,775 quarterly observations for 10,981 office, apartment, retail, and industrial properties in US.	Cross-sectional; objective data on real estate performance from the National Council of Real Estate Investment Fiduciaries; Walkability data from Front Seat's WalkScore.	An important large-scale national study of retail, office and residential properties confirmed these findings. Comparing 10,000 properties for which NAREIT data was available, and accounting for other variables, the study found that retail properties with a Walk Score® ranking of 80 were valued 54% higher than properties with a Walk Score® ranking of 20. This was accompanied by an increase in net…	3.5	+
30	Mixed use	economic	From Gary Hack ALR report: Schmitz A, Scully J. (2006). Creating Walkable Places: Compact, Mixed Use Solutions.Washington, D.C.: Urban Land Institute.	http://uli.bookstore.ipgbook.com/creating-walkable-places-products-9780874209389.php?page_id=21	Case studies include the City Heights Urban Village in San Diego, California; Centennial Lakes in Edina, Minnesota; Birkdale Village in Huntersville, North Carolina; and many others.	Case studies describe walkable, mixed-use town centers, as well as pedestrian-focused communities in both urban and suburban settings.	When new housing is available and attractive in walkable neighborhoods, it can command a premium of $20,000 for similar amounts of living space, trading off smaller yards	2	+
31	Density; Mixed use	economic	From Gary Hack ALR report: Cortright J. (2009). Walking the Walk: How Walkability Raises Housing Values in U.S. Cities. Washington, D.C.: CEOs for Cities.	www.ceosforcities.org/files/WalkingTheWalk_CEOsforCities1.pdf	Data from 90,000 recent home sales in 15 different markets around the United States.	Using an economic technique called hedonic regression, we estimate how much market value homebuyers implicitly attach to houses with higher Walk Scores.	A careful study in 15 cities, controlling for a variety of contextual factors, found that shifting from average to above-average Walk Score® ratings raised the housing values by $4,000 to $34,000, depending upon the metropolitan area. The amounts tended to be greater in dense urban areas such as Chicago and San Francisco and lower in low-density cities such as Tucson and Fresno	3.5	+
32	Greenery (Urban parks)	Physical health; Mental health; Environment benefits	Konijnendiik CC, Annerstedt M, Nielsen AB, Maruthaveeran S. (January 2013). Benefits of Urban Parks: A Systematic Review. Copenhagen and Alnarp: International Federation of Parks and Recreation Administration Report.	http://www.ifpra.org/images/park-benefits.pdf	N=86 peer reviewed, English language articles (inc. only other systematic reviews, or metaanalyses, or original scientific paper). International.	systematic review	reduced stroke mortality, reduced cardiovascular/respiratory mobiditiy: each of these outcomes was supported by one high-quality study, but difficult to draw any conclusionss on strength of the evidence. However, the findings suggest a potentially good effect./ psychological wellbeing: weak to moderate evidence was found; for mental health, moderate evidence was found. / obesity: evidence was mod…	4.5	+ (weak for some)
33	Greenery (Urban parks)	Environmental (pollution)	From Konijnendiik CC et al. review: Lam KC et al. (2005). Environmental Quality of Urban Parks and Open Spaces in Hong Kong. Environmental Monitoring and Assessment,111(1-3):55-73.	http://link.springer.com/article/10.1007%2Fs10661-005-8039-2	70 parks in Hong Kong	hybrid field measurement and computer simulation approach	this was only study found by the review that provided moderate to strong evidence on air quality.	3.5	+
34	Greenery (Urban parks)	Mental health	From Konijnendiik CC et al. review: Fuller RA, Irvine KN, Devine-Wright P, Warren PH, Gaston KJ. (2007). Psychological Benefits of Greenspace Increase with Biodiversity. Biology Letters 3, 390-394.	http://rsbl.royalsocietypublishing.org/content/3/4/390.full	N=312 adults in Sheffield, UK	observational and interviews	moderately significant correlation between urban parks and pyschological benefit	3.5	+
35	Greenery (Urban parks)	Mental health (stress reduction)	From Konijnendiik CC et al. review: Hansmann, R, Hug, SM, Seeland, K. (2007). Restoration and Stress Relief through Physical Activities in Forests and Parks. Urban Forestry and Urban Greening,6: 213-225.	http://www.sciencedirect.com/science/article/pii/S1618866707000623	N=164; parks and forests in Zurich, Switzerland	field survey, cross sectional, interviews	moderately significant association between city forest and park and a 87% recovery ration from stress,	3.5	+
36	Greenery (Urban parks)	Social benefits (social support)	From Konijnendiik CC et al. review: Maas, J, Van Dillen, SME, Verheij, RA, Groenewegen, PP. (2009). Social Contacts as a Possible Mechanism Behind the Relation between Green Space and Health. Health & Place, 15:586-595.	http://www.ncbi.nlm.nih.gov/pubmed/19022699	N=1089 adults, Netherlands	observational, national health survey, health interview, national land cover data	Moderately to highly significant association between having more green in neighborhood and feeling less lonely and less experience of shortage of social support.	3.5	+
37	Greenery (Urban parks)	Physical health (obesity)	From Konijnendiik CC et al. review: Bell, JF, Wilson, JS, Liu, GC, 2008. Neighborhood Greenness and 2-year Changes in Body Mass Index of Children and Youth. American Journal of Preventive Medicine,35:547.	http://www.ncbi.nlm.nih.gov/pubmed/19000844	N=3831 children aged 3-16 years, Marion County, Indiana	Prospective cohort data, geocoded addresses	higher greenness in urban green spaces significantly associated with lower BMI at follow-up, and higher greenness significantly related with lower odds of increasing BMI scores.	3.5	+
38	Greenery (Urban parks)	Physical health (obesity)	From Konijnendiik CC et al. review: Potestio ML et al. (2009). Is there an Association between Spatial Access to Parks/Green Space and Childhood Overweight/Obesity in Calgary, Canada? International Journal of Behavioral Nutrition and Physical Activity, 6:77 doi:10.1186/1479-5868-6-77	http://www.ijbnpa.org/content/6/1/77	N=6772 children in Calgary, Canada (mean age=4.95 years)	observational; BMI measurements, GIS	no significant association between access to parks and children's overweight/obesity.	3.5	0
39	Mixed use; Density	Injury prevention (crime prevention/reduction)	Cozens PM. (2008). New Urbanism, Crime, and the Suburbs: a Review of the Evidence. Urban Policy and Research, 26(4):429-444.	http://www.csun.edu/~sd1229/690H/New%20Urbanism-Crime-and%20the%20Suburbs-2008.pdf	international; did not indicate # of studies reviewed	review of environmental criminology literature	more permeable residential street networks are associated with higher levels of crime than less permeable ones, such as cul-de-sacs. Mixed-use developments and parking in rear lanes in suburban residential areas are also associated with increased levels of crime. Author concludes: "In view of the literature, the crime dimension cannot be ignored in the development and refinement of both New Urban…	4	-
40	Mixed use; Density	Injury prevention (crime prevention/reduction)	From Cozens PM review: Knowles P. (2003). The Cost of Policing New Urbanism. Safer Communities,2(4):33-37.	10.1108/17578043200300049 (Permanent URL)	2 housing developments in New Bedfordshire, England	compares two housing developments in New Bedfordshire, Englad	reported crime is 5 times higher in New Urbanist layouts; 6 of the first 7 reasons burglars stated for selecting a particular property were related to access routes. (but this study has been widely criticized)	3.5	-
41	Mixed use	Injury prevention (crime prevention/reduction)	From Cozens PM review: Wilcox P. et al. (2004). Busy places and Broken Windows? Towards Defining the Role of Physical Structure and Process in Community Crime Models. Sociological Quarterly,45(2):185-207.	http://onlinelibrary.wiley.com/doi/10.1111/j.1533-8525.2004.tb00009.x/abstract	N=100 Seattle census tracts	cross sectional	businesses located in residential areas had an increased risk of burglary	3.5	-
42	Mixed use; Density	Social benefits (social capital)	Building Social Capital with Comprehensive Planning and Ordinances.(2008). University of Minnesota: Design for Health Planning Information Sheet.	http://www.planning.ri.gov/documents/comp/SocialCapital.pdf	Case studies in United States	informal review for information sheet for planners	"The evidence related to the effect of residential densities on social capital is mixed. Depending on how social capital is measured, evidence shows that both low and high densities may be associated with social capital (Glaeser and Sacerdote 2000, Williamson 2004)".	4	0
43	Mixed use; Density	Environmental benefits	Ewing R., Bartholomew K, Winkelman S., Walters J., Chen D. (2008). Growing Cooler: The Evidence on Urban Development and Climate Change. Washington, DC: Urban Land Institute.	http://postcarboncities.net/files/SGA_GrowingCooler9-18-07small.pdf	United States; # of studies not reported	exhaustive review	"When viewed in total, the evidence on land use and driving shows that compact development will reduce the need to drive between 20 and 40 percent…So, as a rule of thumb, it is realistic to assume a 30 percent cut in VMT with compact development. Making reasonable assumptions...[this could] reduce total transportation-related CO2 emissions ...by 7 to 10 percent in 2050."	4.5	+
44	Mixed use; Density	Environmental benefits	Greene D, Schafer A. (2003). Reducing Greenhouse Gas Emissions from US transportation. Washington DC: Pew Center on Global Climate Change.	http://www.c2es.org/docUploads/ustransp.pdf	United States; # of studies not reported	review/policy, advocacy think tank report	By combining a variety of policies, U.S. transportation-related carbon emissions could be cut by 20 to 25 percent by 2015 and by 45 to 50 percent by 2030, in comparison to a continuation of current trends in energy efficiency, petroleum dependence, and traffic growth.	2	+
45	Mixed use; Density; Accessibility and connectivity (walkability)	Economic benefits; Social benefits; Physical health	Talen E. (2013). The Walkable Neighborhood: A Literature Review. International Journal of Sustainable Land Use and Urban Planning,1(1):42‐63.	http://www.sciencetarget.com/Journal/index.php/IJSLUP/article/view/211	International; # of studies not reported	review to see how the walkable neighborhood as a policy goal is supported—or contested—by research	"...walkable neighborhoods have been shown to have a positive impact on physical activity and health, economic value, and social connection, although the latter is only weakly supported because of the problem of self-selection bias. Two research findings seem to work against the idea of the walkable neighborhood: walkable neighborhoods are likely to boost gentrification and displacement, and that…	3.5	0
46	Mixed use; Accessibility and connectivity; Density	Environmental benefits	Marshall JD et al. (2009). Healthy Neighborhoods: Walkability and Air Pollution. Environmental Health Perspectives, 117(11):1752-1759.	http://www.ncbi.nlm.nih.gov/pmc/articles/PMC2801167/	49,702 Postal codes in Vancouver, BC	GIS	Walkability is correlated with higher NO concentrations (r=.49) but inversely correlated with ozone concetrations (r= -.70);	3.5	0
47	Mixed use; Accessibility and connectivity (Improved shade and green spaces; Road design)	Physical health; Social benefits	Cheng JJ, Berry P. (2013). Healthy Co-Benefits and Risks of Public Health Adaptation Strategies to Climate Change: A Review of Current Literature. International Journal of Public Health, 58:305-311.	http://www.ncbi.nlm.nih.gov/pubmed/23111371	International; 22 peer reviewed articles	review of English language literature from 1/2000 to 3/2012	The co-benefits and risks identified in the literature most commonly relate to improvements in health associated with adaptation actions that affect social capital and urban design. Health co-benefits of improvements in social capital have positive influences on mental health, independently of other determinants. Risks included reinforcing existing misconceptions regarding health. Health co-benef…	4	+
48	Mixed use; Density; Accessibility and connectivity (walkability)	Environmental benefits	Younger M et al. (2008). The Built Environment, Climate Change, and Health: Opportunities for Co-Benefits. American Journal of Preventive Medicine, 35(5):517-526	http://www.ncbi.nlm.nih.gov/pubmed/?term=younger+built+environment+climate+change	International	informal review with no details on methodology.	The built environment, climate change, and public health are closely connected. Built environment strategies that promote climate change mitigation through transportation infrastructure, building construction, and land-use planning provide opportunities both to improve health and reduce climate change. By combining various built environment strategies through complimentary policies and programs, …	4	+
49	Accessibility and connectivity; Greenery	Environmental benefits; social benefits	Takaro TK et al. (2013). Climate Change and Respiratory Health. Expert Review Respiratory Medicince, 7(4):349-361.	http://www.ncbi.nlm.nih.gov/pubmed/23964626	International; did not indicate # of studies reviewed	expert opinion review of med journals and climate health relevant modeling results from non-biomed journals within last five years; most studies from US but some from other North American countries, and Europe and Asia.	Mitigation of GHGs to reduce future impacts of climate change…has co-benefits for health….such as increased physical activity and shifts to cleaner fuels/ See these studies from Takaro's review: "Designing more walkability and green spaces into our cities enhances neighborhood cohesion, increases social capital, improves the quality of urban living….while reducing emissions, the urban heat island…	4	+
50	Mixed use; Accessibility and connectivity; Density	Environmental benefits	Frank, LD, Sallis, JF, Conway, TL, Chapman, JE, Saelens, BE, & Bachman, W. (2006). Many Pathways from Land Use to Health: Associations between Neighborhood Walkability and Active Transportation, Body Mass Index, and Air Quality. Journal of the American Planning Association, 72(1):75-87.	http://www.tandfonline.com/doi/abs/10.1080/01944360608976725#preview	6,994 adults, King County, Wash.	surveys; census block and land use data	A 5% increase in walkability was associated with a per capital 32.1% increase in time spent in active transportation; a 0.23 point reduction in BMI; 6.5% fewer vehicle miles traveled, 5.6% fewer grams of oxides of nitrogen emitted, and 5.5% fewer grams of volatile organic compounds emitted.	3.5	+
51	Accessibility and connectivity; Mixed use	Economic	Lawlor, Eilis. (2013). The Pedestrian Pound: The Business Case for Better Streets and Places. United Kingdom: Living Streets and Just Economics Report.	http://www.livingstreets.org.uk/sites/default/files/content/library/Reports/PedestrianPound_fullreport_web.pdf	United Kingdom; # of studies not reported	Comprehensive review of the literature was carried out to locate all relevant studies. Economics and ‘grey literature’ databases were searched using relevant search terms tailored to each research question including variants on the search terms:	Research shows that making places better for walking can: boost footfall and trading by up to 40%; raise retail rents by 20%; There are case study examples of where public investment has been associated with subsequent increases in employment. In Dublin, the redevelopment of the Temple Bar District led to a 300% increase in employment before the economic boom. Cultural quarters in Sheffield and M…	4.5	+
52	Greenery (Urban trees)	Environmental benefits; Economic; Physical health	Roy S. et al. (2012). A Systematic Quantitative Review of Urban Tree Benefits, Costs, and Assessment Methods Across Cities in Different Climatic Zones. Urban Forestry and Greening, 11(4):351-363.	http://www.sciencedirect.com/science/article/pii/S1618866712000829	N=115 studies. International	systematic review	Demonstrated tree benefits include: economic, social, health, visual and aesthetic benefits; identified ecosystem services include: carbon sequestration, air quality improvement, storm water attenuation, and energy conservation. Disservices include: maintenance costs, light attenuation, infrastructure damage and health problems, among others. Additional research is required to better inform publi…	4.5	+
53	Greenery	Environmental benefits	Emily B Peters, Joseph P. McFadden. (2012). Continuous Measurements of Net CO2 Exchange by Vegetation and Soils in a Suburban Landscape. Journal of Geophysical Research, 117(G3).	http://onlinelibrary.wiley.com/doi/10.1029/2011JG001933/abstract	Minneapolis–Saint Paul, Minnesota, USA	In a suburban neighborhood of Minneapolis–Saint Paul, Minnesota, USA, we simultaneously measured net CO2 exchange of trees using sap flow and leaf gas exchange measurements, net CO2exchange of a turfgrass lawn using eddy covariance from a portable tower, and total surface-atmosphere CO2 fluxes (FC) using an eddy covariance system on a tall tower.	Our results suggest urban vegetation types can capture much of the variability required to predict seasonal patterns and differences in FC(VegSoil) that could result from changes in land use or vegetation composition in temperate cities.	3.5	+
54	Density (Commute time); Mixed use	Social benefits (Social capital)	Leyden K. (2003). Social Capital and the Built Environment: The Importance of Walkable Neighborhoods. American Journal of Public Health,93: 1546-51.	http://ajph.aphapublications.org/doi/pdf/10.2105/AJPH.93.9.1546	N=279 households in Galway, Ireland	survey data	walkable (pedestrian-oriented), mixed-use neighbourhood designs can encourage the development of social capital, by enhanced levels of community and social engagement	3.5	+
55	Density	Social benefits (Social capital)	Bramley G, Dempsey N, Power S, Brown C, Watkins D. (2009). Social Sustainability and Urban Form: Evidence from Five British cities. Environment and Planning A,41(9):2125-2142.	http://www.envplan.com/abstract.cgi?id=a4184	5 cities in Great Britain	surveys	"...highly dense, compact cities are not necessarily the solution to the problem of urban sprawl. Mid-density designs with up to about 40 dwellings unites per acre appear to be optimal for social interaction with neighbors and particpation in groups, even though neighborhood pride and attachment may be highest at lower densities and use of neighborhood facilities may peak at higher densities."	3.5	0
56	Density; Mixed use	Social benefits (Social capital)	Lund H. (2003). Testing the Claims of New Urbanism - Local Access, Pedestrian Travel, and Neighboring Behaviors. Journal of the American Planning Association, 69(4):414-429.	http://www.sjsu.edu/people/allen.tai/courses/urbp255/s2/Testing%20the%20Claims%20of%20New%20Urbanism.pdf	N=1454 residents in Portland, OR	survey data	"As a whole, there is not a significant direct relationship between the objective environmental variables and acts of neighboring. The interaction between "inner-city neighborhood" and "retail access only" is significant, however, even when all other variables are controlled. This suggests that local access to retail shops contributes positively to acts of neighboring in inner-city neighborhoods,…	3.5	0
57	Mixed use	Physical health (weight/obesity)	Durand, Casey P., et al. (2011). A Systematic Review of Built Environment Factors Related to Physical Activity and Obesity Risk: Implications for Smart Growth Urban Planning. Obesity Reviews, 12(5): e173-e182.	http://www.ncbi.nlm.nih.gov/pubmed/21348918	Searching the MEDLINE, Psycinfo and Web-of-Knowledge databases, 204 articles were identified for descriptive review, and 44 for a more in-depth review of studies that evaluated four or more smart growth planning principles. International	systematic review (all studies looking at BMI were cross sectional)	80% (n=8 studies) found no effect, and one study each had results in the expected and unexpected direction.	4.5	0
58	density (development directed toward existing communities "infill")	Physical health (weight/obesity)	Durand, Casey P., et al. (2011). A Systematic Review of Built Environment Factors Related to Physical Activity and Obesity Risk: Implications for Smart Growth Urban Planning. Obesity Reviews, 12(5): e173-e182.	http://www.ncbi.nlm.nih.gov/pubmed/21348918	Searching the MEDLINE, Psycinfo and Web-of-Knowledge databases, 204 articles were identified for descriptive review, and 44 for a more in-depth review of studies that evaluated four or more smart growth planning principles. International	systematic review (all studies looking at BMI were cross sectional)	2 of the 3 studies which examined relation between infill development and BMI found no effect, while the other one had results in the expected direction.	4.5	0
59	Density	Physical health (weight/obesity)	Durand, Casey P., et al. (2011). A Systematic Review of Built Environment Factors Related to Physical Activity and Obesity Risk: Implications for Smart Growth Urban Planning. Obesity Reviews, 12(5): e173-e182.	http://www.ncbi.nlm.nih.gov/pubmed/21348918	Searching the MEDLINE, Psycinfo and Web-of-Knowledge databases, 204 articles were identified for descriptive review, and 44 for a more in-depth review of studies that evaluated four or more smart growth planning principles. International	systematic review (all studies looking at BMI were cross sectional)	All 6 studies on compact development patterns and BMI found no effect.	4.5	0
60	Density; Mixed use	Physical health (weight/obesity)	Durand, Casey P., et al. (2011). A Systematic Review of Built Environment Factors Related to Physical Activity and Obesity Risk: Implications for Smart Growth Urban Planning. Obesity Reviews, 12(5): e173-e182.	http://www.ncbi.nlm.nih.gov/pubmed/21348918	Searching the MEDLINE, Psycinfo and Web-of-Knowledge databases, 204 articles were identified for descriptive review, and 44 for a more in-depth review of studies that evaluated four or more smart growth planning principles. International	systematic review (all studies looking at BMI were cross sectional)	body mass was largely unaffected	4.5	0
61	Density; Mixed use	Physical health	Yen I, Michael Y, Purdue L. (2009). Neighborhood Environment in Studies of Health of Older Adults. A Systematic Review. American Journal of Preventive Medicine, 37(5): 455–463.	doi:10.1016/j.amepre.2009.06.022	33 English language articles. International	systematic review	"Theories of environmental aging suggest that as people age and their mobility declines, their residential neighborhood environment may become more relevant to their health and wellbeing. Yet the existing research does not consistently support this model."	4.5	0
62	Density; Mixed use	Economic	Community Preference Survey. (2013). Washingtong, D.C. National Association of Realtors.	http://www.realtor.org/articles/nar-2013-community-preference-survey	N=1500 US adults	survey	60 percent of respondents favor a neighborhood with a mix of houses, stores, and other businesses that are within walking distance, rather than neighborhoods requiring driving between home, work, and recreation. Respondents indicated that while the size of a home or yard does matter, most are willing to compromise size for a preferred neighborhood and less commuting.	2	+
63	Density; Accessibility and connectivity	Physical health (BMI)	McDonald KN, Oakes JM, Forsyth A. (2012). Effect of Street Connectivity and Density on Adult BMI: Results from the Twin Cities Walking Study. Journal of Epidemiological Community Health, July;66(7):636-40. doi: 10.1136/jech.2010.122556. Epub 2011 Jan 17.	http://www.ncbi.nlm.nih.gov/pubmed/16829327	N=720 adults, Twin Cities	cross-sectional observational study	Contrary to expectations, the hypothesised most walkable neighbourhood (high density, small block stratum) had the greatest mean and median BMI. After adjusting for demographic covariates, physical activity and clustering due to neighbourhood, no conclusive effect of population density by block size on BMI was found (β=−1.024, 95% CI −2.408 to 0.359).	3.5	-
64	Mixed use; Accessibility and connectivity	Physical health (weight/obesity)	Grasser G, Van Dyck D, Titze S, Stronegger W. (2012). Objectively Measured Walkability and Active Transport and Weight-Related Outcomes in Adults: A Systematic Review. International Journal of Public Healt: 1-11.	https://biblio.ugent.be/publication/3098344	Thirty-four publications based on 19 different studies were eligible (English language only). International.	systematic review	Results on weight-related measures and walkability were inconsistent.	4.5	0
65	Mixed use; Accessibility and connectivity; Density	Injury prevention (crime prevention/reduction)	Anderson JM et al. (2013). Reducing Crime by Shaping the Built Environment with Zoning. An Empirical Study of Los Angeles. University of Pennsylvania Law Review,161: 699-756.	https://www.law.upenn.edu/journals/lawreview/articles/volume161/issue3/AndersonMacdonaldBluthenthalAshwood161U.Pa.L.Rev.699%282013%29.pdf	N=205 face blocks in Los Angeles	systematic observation	"Despite occasional suggestions that land use regulation could be an important tool in reducing crime, existing research generally has not identified specific modifications to the built environment that can effectively reduce crime and violence. While no shortage of plausible hypotheses exist about the relationship between land use, the built environment, and crime, there is little high quality e…	4.5	0
66	Mixed use	Physical health; Social benefits; Mental health	Renalds, A, Smith, TH, & Hale, PJ. (2010). A Systematic Review of Built Environment and Health. Family & Community Health, 33(1), 68-78.	http://www.ncbi.nlm.nih.gov/pubmed/20010006	All ages. International.	Systematic review (23 studies)	Neighborhoods that are characterized as more walkablke, either leisure-oriented or destination-driven, are associated with increased physical activity, increased social capital, lower overweight, lower reports of depression, and less alcohol abuse.	4.5	+
67	Greenery	Mental health	Macdonald, E, Sanders, R, & Supawanich, P. (2008). The Effects of Transportation Corridors' Roadside Design Features on User Behavior and Safety, and their Contributions to Health, Environmental Quality, and Community Economic Vitality: A Literature Revie	http://www.uctc.net/papers/878.pdf	All ages. International.	Non-systematic review (180 studies/reports - international) of studies dealing with the effects of transportation corridors' features	Time spent viewing greenspace or being outside in a calm environment enhanced positive feelings both directly and indirectly by taming stress and frustration, and was associated with improved performance on subject tests. In particular, the presence of roadside landscaping has been tied to reduced traffic stress for both drivers and those who live along heavily traveled corridors. Other research …	4	+
68	Greenery	Economics: Land value	Macdonald, E, Sanders, R, & Supawanich, P. (2008). The Effects of Transportation Corridors' Roadside Design Features on User Behavior and Safety, and their Contributions to Health, Environmental Quality, and Community Economic Vitality: A Literature Revie	http://www.uctc.net/papers/878.pdf	All ages. International.	Non-systematic review (180 studies/reports - international) of studies dealing with the effects of transportation corridors' features	There is not much literature on the relationships between corridor design elements and community economic vitality. However, the research that has been done indicates that for both commercial and residential areas, the presence of landscaping and trees generally improves property or rent values and attracts people.	4	weak +
69	Greenery	Environmental benefits	Macdonald, E, Sanders, R, & Supawanich, P. (2008). The Effects of Transportation Corridors' Roadside Design Features on User Behavior and Safety, and their Contributions to Health, Environmental Quality, and Community Economic Vitality: A Literature Revie	http://www.uctc.net/papers/878.pdf	All ages. International.	Non-systematic review (180 studies/reports - international) of studies dealing with the effects of transportation corridors' features	Urban trees help reduce energy consumption, mitigate urban heat island effects, retain stormwater, and mitigate air pollution. Some research studies found that urban street trees that shade both buildings and paved surfaces make important contributions to energy savings, emission reduction, and heat island mitigation. In addition, the shade from trees prolongs material life, such as roadway slurr…	4	+
70	Density; Mixed use	Environmental benefits	National Research Council of the National Academies. (2009). Driving and the Built Environment: The Effects of Compact Development on Motorized Travel, Energy Use, and CO2 Emissions (Special Report 298). Washington, DC: Transportation Research Board.	http://onlinepubs.trb.org/Onlinepubs/sr/sr298.pdf	All ages. US metropolitan areas.	Non-systematic review, commissioned papers, and expert panel of studies examining personal travel in US metropolitan areas	Developing more compactly, that is, at higher residential and employment densities, is likely to reduce VMT. The literature suggests that doubling residential density across a metropolitan area might lower household VMT by about 5 to 12 percent, and perhaps by as much as 25 percent, if coupled with higher employment concentrations, significant public transit improvements, mixed uses, and other su…	4	+
71	Density (Housing)	Social benefits (quality of life)	Sarmiento, OL, Schmid, TL, Parra, DC, Dias-del-Castillo, A, Fernando Gomez, L, Pratt, M, et al. (2010). Quality of Life, Physical Activity, and Built Environment Characteristics among Colombian Adults. Journal of Physical Activity and Health, 7(Suppl 2), S181-S195.	http://journals.humankinetics.com/jpah-back-issues/jpah-volume-7-supplement-july/quality-of-life-physical-activity-and-built-environment-characteristics-among-colombian-adults	1,334 adults from Bogota	Cross-sectional study using questionnaires and statistical analysis to assess associations between health-related quality of life, physical activity and built environment	Adults who live in more dense blocks were more likely to have a higher mean score of health-related quality of life. Compared with adults living in blocks within the lowest tertile of house density, those living in blocks within the highest tertile of density were more likely to have higher means scores of HR-QOL (low tertile [90.21] vs. high tertile [ 92.19]; β = 2.0; P = .026).	3.5	+
72	Mixed use	Social benefits (quality of life)	Sarmiento, OL, Schmid, TL, Parra, DC, Dias-del-Castillo, A, Fernando Gomez, L, Pratt, M, et al. (2010). Quality of Life, Physical Activity, and Built Environment Characteristics among Colombian Adults. Journal of Physical Activity and Health, 7(Suppl 2), S181-S195.	http://journals.humankinetics.com/jpah-back-issues/jpah-volume-7-supplement-july/quality-of-life-physical-activity-and-built-environment-characteristics-among-colombian-adults	1,334 adults from Bogota	Cross-sectional study using validated instruments and questionnaires and statistical analysis to assess associations between health-related quality of life, physical activity and built environment	Land-use heterogeneity was associated with all the health-related quality of life indicators. Compared with adults living in blocks within the lowest tertile of the land use heterogeneity index, those living in blocks within the medium tertile were more likely to have higher mean scores of HR-QOL (low tertile [90.22] vs. medium tertile [ 95.52]; β = 2.1; P = .019). Compared with adults living in …	3.5	+
73	Accessibility and connectivity (street network density)	Physical health	Sarmiento, OL, Schmid, TL, Parra, DC, Dias-del-Castillo, A, Fernando Gomez, L, Pratt, M, et al. (2010). Quality of Life, Physical Activity, and Built Environment Characteristics among Colombian Adults. Journal of Physical Activity and Health, 7(Suppl 2), S181-S195.	http://journals.humankinetics.com/jpah-back-issues/jpah-volume-7-supplement-july/quality-of-life-physical-activity-and-built-environment-characteristics-among-colombian-adults	1,334 adults from Bogota	Cross-sectional study using validated instruments and questionnaires and statistical analysis to assess associations between health-related quality of life, physical activity and built environment	Adults living in neighborhoods with higher street network density were less likely to perceive their health status as good or excellent (low [66.97] vs. high [59.72] P = .033) or to report being positive or very positive about the future (prevalence = low [74.83] vs. high [70.07], P = .045).	3.5	+
74	Mixed use	Social benefits (opinion polling)	Urban Land Institute. (2013). America in 2013: A ULI Survey on Views on Housing, Transportation and Community. Washington, DC: Urban Land Institute.	http://www.uli.org/research/centers-initiatives/terwilliger-center-for-housing/research/community-survey/	1,202 adults (18 years or older) in United States	Random telephone survey	More than half of Americans prefer neighborhoods that are close to shops, have a mix of incomes, and have public transportation. Neighborhoods that are close to a mix of shops, restaurants, and offices are especially appealing to African Americans (75%), members of generation Y (62%), single people (60%), renters (60%), and college graduates (60%).	2	+
75	Mixed use	Social benefits (opinion polling)	Urban Land Institute. (2013). America in 2013: A ULI Survey on Views on Housing, Transportation and Community. Washington, DC: Urban Land Institute.	http://www.uli.org/research/centers-initiatives/terwilliger-center-for-housing/research/community-survey/	1,202 adults (18 years or older) in United States	Random telephone survey	62% of Americans planning to move in the next five years would prefer to settle in mixed-use communities. Many want communities that include a mix of homes (50%) and have access to public transportation (52%).	2	+
76	Mixed use	Economics: Land value	Resource Systems Group, Inc., Economic and Policy Resources, Inc., & Local Motion. (20012). Economic Impact of Bicycling and Walking in Vermont. Montpelier, VT: Vermont Agency of Transportation.	http://www.localmotion.org/documents/advocacy/Final_Draft_Report_Econ_Impact_Walking_and_Biking_030812.pdf	61 municipalities in Vermont	Cross-sectional, economic modeling and survey of cities of bicycle and pedestrain infrastructure costs, and home sales	Using a national walkability index that considers the proximity of a home to businesses, employment, schools and other destinations, the closing price and other statistics for 18,500 home sales in Vermont were evaluated. The conclusion is that there is an increase in home values statewide of approximately $350 million because those homes are in more walkable areas. This value was not processed th…	3	+
77	Mixed use	Mental health	Frumkin, H, Frank, L, & Jacson R. (2004). Urban Sprawl and Public Health. Washington, DC: Island Press.	n/a	United States	Literature review on sprawl and public health	A study of commuters in Irvine, California showed that longer commutes predicted higher blood pressure and more self-reported measures of stress such as being “tense” and having “nervous” feelings.	4	-
78	Mixed use	Economics: Productivity, Job performance	Frumkin, H, Frank, L, & Jacson R. (2004). Urban Sprawl and Public Health. Washington, DC: Island Press.	n/a	United States	Literature review on sprawl and public health	The book discussed numerous studies showing that longer commutes predict more lost days at work, more late arrivals at work and higher employee turnover. They report that thee vidence is not entirely conclusive, as other studies do not support these conclusions, but evidence does point in this direction.	4	-
79	Street-scale pedestrian design (Urban design for walking)	Social benefits (social interaction)	Adams, EJ, Goad, MA, & Cavill, N. (2012). Evaluation of Living Streets' Fitter for Walking Project. Loughborough, UK: BHF National Centre for Physical Activity and Health, School of Sport, Exercise and Health Sciences, Loughborough University.	http://www.eltis.org/docs/studies/Fitterforwalkingevaluation.pdf	Purposive sample for qualitative research; random samples for route user surveys . United Kingdom	Interviews and focus groups with project coordinators on an regular basis throughout the project; one interview with each Local Authority partner towards the end of the project; focus groups or interviews with community members from a sub-set of projects across the five regions; route user counts and route user surveys in seven projects and a residents‟ survey in five projects.	Project increased community engagement; made environmental improvements; improved links between community and local government; reduced environmental barriers to walking; improved social interaction.	2	+
80	Density; Mixed use; Accessibility and connectivity (Urbanisation)	Physical health (Food supply and healthy aspects of food availability)	World Cancer Research Fund, American Institute for Cancer Research Web site. Food, Nutrition, Physical Activity, and the Prevention of Cancer: A Global Perspectives. http://www.dietandcancerreport.org/policy_report/index.php. Accessed January 2014.	http://www.dietandcancerreport.org/policy_report/index.php	all ages; international	Systematic reviews	With industrialisation and urbanisation, food supplies usually become more secure, and more food is available for consumption. In general, diets become more energy dense, containing fewer starchy foods, more fats and oils, sugars, and additives, and often more alcoholic drinks.	4	-
81	Density; Mixed use; Accessibility and connectivity (urban spatial planning)	Social benefits (cohesion and support); Environmental benefits (noise and air quality); Injury prevention; Disparities (equity and poverty reduction)	World Health Organization Europe. (2005). Designing Healthier and Safer Cities: The Challenge of Urban Planning. Copenhagen: World Health Organization.	http://www.euro.who.int/__data/assets/pdf_file/0020/101477/bursa_statement_E.pdf	all ages; international	Expert consensus meeting	Scientific evidence that good urban spatial planning can shape people’s health, through the design of environments that address key ‘determinants of health’ by providing: opportunities for healthy active lifestyles (especially regular exercise); access to affordable, high-quality housing; opportunities for social cohesion and supportive social networks; access to diverse employment opportunities;…	1	+
82	Density; Street-scale pedestrian design (Spatial planning, provision of space)	Environmental benefits (air quality); Mental health	Boyce, T. & Patel, S. (2009). The Health impacts of Spatial Planning Decisions. London: The Kings Fund.	http://www.apho.org.uk/resource/item.aspx?RID=77518	all ages; UK	Relevant literature was reviewed and evidence of relationships between planning and health and related interventions were analysed and graded on potential health risk	There are 4 key spatial planning issues identified as likely to have more significant impacts on health; transportation public spaces, housing and flooding. 1/4 of the global disease burden is attributable to environmental factors. The report found strong evidence that: the provision of space increases exercise; reductions in traffic reduces air pollution; green space improves mental health; mode…	2	+
83	Density; Mixed use; Accessibility and connectivity (Urban planning)	Injury prevention (safety)	Duhl, LJ & Sanchez, AK. (1999). Healthy Cities and the City Planning Process: A Background Document on the Links Between Health and Urban Planning. Copenhagen: WHO Regional Office For Europe.	http://www.euro.who.int/__data/assets/pdf_file/0009/101610/E67843.pdf	all ages; Europe	Review paper	Certain elements of design and planning can add to the poor safety conditions for community residents, especially for women and children.	2	-
84	Density; Mixed use; Accessibility and connectivity (Urban planning)	Environmental benefits (pollution)	Duhl, LJ & Sanchez, AK. (1999). Healthy Cities and the City Planning Process: A Background Document on the Links Between Health and Urban Planning. Copenhagen: WHO Regional Office For Europe.	http://www.euro.who.int/__data/assets/pdf_file/0009/101610/E67843.pdf	all ages; Europe	Review paper	Urban planning has contributed to the dominance of the automobile. In the United States, transportation sources alone contribute 77% of the carbon monoxide released into the air.	2	-
85	Density; Mixed use; Accessibility and connectivity (Urban planning)	Social benefits (Fragmentation, supportive social relationships)	Duhl, LJ & Sanchez, AK. (1999). Healthy Cities and the City Planning Process: A Background Document on the Links Between Health and Urban Planning. Copenhagen: WHO Regional Office For Europe.	http://www.euro.who.int/__data/assets/pdf_file/0009/101610/E67843.pdf	all ages; Europe	Review paper	Urban planning policies have led to an increased sense of fragmentation in urban communities. Urbanization and industrialization have decreased the likelihood that supportive social relationships can exist, even though they have created the conditions for a higher standard of living in material goods and improved sanitation.	2	-
86	Density; Mixed use; Accessibility and connectivity (Urban planning)	Environmental benefits	Duhl, LJ & Sanchez, AK. (1999). Healthy Cities and the City Planning Process: A Background Document on the Links Between Health and Urban Planning. Copenhagen: WHO Regional Office For Europe.	http://www.euro.who.int/__data/assets/pdf_file/0009/101610/E67843.pdf	all ages; Europe	Review paper	As our cities become more complex, so do the related environmental problems. These problems, ranging from loss of open space to climate changes, are felt locally, nationally and internationally.	2	-
87	Density; Mixed use; Accessibility and connectivity (Urban planning)	Physical health	Barber, A, Barton, H, Dales, J, Earley, D, Hamilton-Baillie, B, Hulme, J, & Insall, P. (2007). Building Health: Creating and Enhancing Places for Healthy, Active Lives. What Needs to be Done? London: National Heart Forum.		all ages, UK	Investigation of the relationship between the built environment and physical activity where research evidence maybe lacking. It brings together the thinking of leading players in this area	A wide range of recommendations for changes to policies on the built environment; no real evidence of links.	1	0
88	Greenery; Density; Mixed use (Spatial Planning)	Physical health	Geddes, I, Allen, J, Allen, M, & Morrisey, L. (n.d.). The Marmot Review: Implications for Spatial Planning.	http://www.nice.org.uk/nicemedia/live/12111/53895/53895.pdf	Evidence Review; UK	Analysis of evidence on health and the built environment, sustainable development and spatial planning	Elements identified as having a significant impact on health and socio-economic status are: pollution, green and open space, transport, food, housing, community participation and social isolation. The paper finds that those living in deprived areas die earlier and spend more time in ill-health and that we should therefore prioritise policies and interventions to reduce inequalities by; improving …	4	+
89	Greenery	Social benefits (cohesion); Physical health; Mental health (stress, isolation); Economic (productivity/job performance)	Commission for Architecture and the Built Environment. (2009). Future Health: Sustainable Places for Health and Well-being. London: Commission for Architecture and the Built Environment.	https://www.designcouncil.org.uk/sites/default/files/asset/document/future-health-full.pdf	all ages; UK	General review (non systematic)	Focuses on health but also references multiple co-benefits, for example: "Evidence increasingly suggests that people with access to quality green space are healthier. Being outside can promote mental well-being, relieve stress, overcome isolation, improve social cohesion and alleviate physical problems so that fewer working days are lost to ill health."	2	+
90	Street-scale pedestrian design (housing and streetscale design)	Social benefits (social relationships, social isolation reduction); Incivilities (vandalism)	Healthy Communities Task Group. (2009). Delivering Healthy Communities. Good Practice Note 5. London: Royal Town Planning Institute.	http://www.rtpi.org.uk/media/6325/GPN5_final.pdf	United Kingdom	Guidance document	Poor quality neighbourhoods can have a negative impact on the health of those who live in them. It is important that housing and streetscape design are considered as part of a neighbourhood that go towards building social relationships as positive contributions toward health. Mixed communities with a range of housing types and tenures, well-designed walkways, cycle routes and streets are most lik…	2	+
91	Density; Mixed use; Accessibility and connectivity (walkability)	Economic (Consumer cost savings)	Litman, TA. (2011). Economic Value of Walkability. Victoria, B.C.: Victoria Transport Policy Institute.	http://www.vtpi.org/walkability.pdf	All ages, international	Review of categories of economic benefits, how they can be measured, and how they are reflected in transportation and land use planning	Walkability affects consumer transport costs. Improved walkability allows consumers to save on vehicle expenses (“Affordability,” VTPI 2008). For example, one study found that households in automobile-dependent communities devote 50% more to transportation (more than $8,500 annually) than households in communities with more accessible land use and more multi-modal transportation systems (less tha…	2	+
92	Density; Mixed use; Accessibility and connectivity (walkability)	Economic	Litman, TA. (2011). Economic Value of Walkability. Victoria, B.C.: Victoria Transport Policy Institute.	http://www.vtpi.org/walkability.pdf	All ages, international	Review of categories of economic benefits, how they can be measured, and how they are reflected in transportation and land use planning	Low-density development with large amounts of land paved for roads and parking imposes various economic, social and environmental costs (Appleyard 1981; Burchell 1998; Litman 2002; “Land Use Evaluation,” VTPI 2008; USEPA 2001). Walkability improvements can help reduce these costs by reducing the amount of land required for transport facilities and encouraging more accessible, clustered land use p…	2	+
93	Density; Mixed use; Accessibility and connectivity (urban form)	Environmental benefits (green house gas emissions)	Barla, P, Miranda-Moreno, LF, & Lee-Gosselin, M. (2011). Urban Travel CO2 Emissions and Land Use: A Case Study for Quebec City. Transportation Research Part D: Transport and Environment,16(6): 423-428.	http://www.sciencedirect.com/science/article/pii/S1361920911000447	400 respondents from 250 households (15000 trips) from a longitudinal travel survey. Quebec City, Canada	Estimated models DV= daily GHG emissions produced by individuals; IV=sociodemographic and environmental characteristics	Adjusted for other characteristics, a resident of old suburbs/new suburbs/periphery areas would produce 19%/27%/70% more emissions than if s/he was located in the city center.	3.5	+
94	Density (around home)	Environmental benefits (green house gas emissions)	Barla, P, Miranda-Moreno, LF, & Lee-Gosselin, M. (2011). Urban Travel CO2 Emissions and Land Use: A Case Study for Quebec City. Transportation Research Part D: Transport and Environment,16(6): 423-428.	http://www.sciencedirect.com/science/article/pii/S1361920911000447	400 respondents from 250 households (15000 trips) from a longitudinal travel survey. Quebec City, Canada	Estimated models DV= daily GHG emissions produced by individuals; IV=sociodemographic and environmental characteristics	Significant and negative association between density around home and GHG emissions (Elasticity=-0.13)	3.5	+
95	Density (around work)	Environmental benefits (green house gas emissions)	Barla, P, Miranda-Moreno, LF, & Lee-Gosselin, M. (2011). Urban Travel CO2 Emissions and Land Use: A Case Study for Quebec City. Transportation Research Part D: Transport and Environment,16(6): 423-428.	http://www.sciencedirect.com/science/article/pii/S1361920911000447	400 respondents from 250 households (15000 trips) from a longitudinal travel survey. Quebec City, Canada	Estimated models DV= daily GHG emissions produced by individuals; IV=sociodemographic and environmental characteristics	Significant and negative association between density around work and GHG emissions (Elasticity=-0.07)	3.5	+
96	Density (residential)	Environmental benefits (CO2 emissions (estimated in 4 ways))	Hong, J & Goodchild, A. (2014). Land Use Policies and Transport Emissions: Modeling the Impact of Trip Speed, Vehicle Characteristics and Residential Location. Transportation Research Part D: Transport and Environment, 26: 47-51.	http://www.sciencedirect.com/science/article/pii/S1361920913001363	4746 households living in the Puget Sound Region. Pierce County, WA, USA	Household Activity Survey, multi-level modeling adjusted for clustering, household size, income, # workers and # vehicles	Residential density was inversely associated with CO2 emissions (b: -0.255--0.375) in urban areas	3.5	+
97	Density (residential)	Environmental benefits (CO2 emissions (estimated in 4 ways))	Hong, J & Goodchild, A. (2014). Land Use Policies and Transport Emissions: Modeling the Impact of Trip Speed, Vehicle Characteristics and Residential Location. Transportation Research Part D: Transport and Environment, 26: 47-51.	http://www.sciencedirect.com/science/article/pii/S1361920913001363	4746 households living in the Puget Sound Region. Pierce County, WA, USA	Household Activity Survey, multi-level modeling adjusted for clustering, household size, income, # workers and # vehicles	Residential density was inversely associated with CO2 emissions (b: -1.090--1.347) in suburban areas	3.5	+
98	Mixed use (entropy)	Environmental benefits (CO2 emissions (estimated in 4 ways))	Hong, J & Goodchild, A. (2014). Land Use Policies and Transport Emissions: Modeling the Impact of Trip Speed, Vehicle Characteristics and Residential Location. Transportation Research Part D: Transport and Environment, 26: 47-51.	http://www.sciencedirect.com/science/article/pii/S1361920913001363	4746 households living in the Puget Sound Region. Pierce County, WA, USA	Household Activity Survey, multi-level modeling adjusted for clustering, household size, income, # workers and # vehicles	Entropy was inversely associated with CO2 emissions (b: -0.314--0.320) in urban areas	3.5	+
99	Mixed use (entropy)	Environmental benefits (CO2 emissions (estimated in 4 ways))	Hong, J & Goodchild, A. (2014). Land Use Policies and Transport Emissions: Modeling the Impact of Trip Speed, Vehicle Characteristics and Residential Location. Transportation Research Part D: Transport and Environment, 26: 47-51.	http://www.sciencedirect.com/science/article/pii/S1361920913001363	4746 households living in the Puget Sound Region. Pierce County, WA, USA	Household Activity Survey, multi-level modeling adjusted for clustering, household size, income, # workers and # vehicles	Entropy was inversely associated with CO2 emissions (b: -0.260--0.277) in suburban areas	3.5	+
100	Accessibility and connectivity (intersection density)	Environmental benefits (CO2 emissions (estimated in 4 ways))	Hong, J & Goodchild, A. (2014). Land Use Policies and Transport Emissions: Modeling the Impact of Trip Speed, Vehicle Characteristics and Residential Location. Transportation Research Part D: Transport and Environment, 26: 47-51.	http://www.sciencedirect.com/science/article/pii/S1361920913001363	4746 households living in the Puget Sound Region. Pierce County, WA, USA	Household Activity Survey, multi-level modeling adjusted for clustering, household size, income, # workers and # vehicles	Intersection density was inversely associated with CO2 emissions (b: -0.590--0.654) in urban areas	3.5	+
101	Accessibility and connectivity (intersection density)	Environmental benefits (CO2 emissions (estimated in 4 ways))	Hong, J & Goodchild, A. (2014). Land Use Policies and Transport Emissions: Modeling the Impact of Trip Speed, Vehicle Characteristics and Residential Location. Transportation Research Part D: Transport and Environment, 26: 47-51.	http://www.sciencedirect.com/science/article/pii/S1361920913001363	4746 households living in the Puget Sound Region. Pierce County, WA, USA	Household Activity Survey, multi-level modeling adjusted for clustering, household size, income, # workers and # vehicles	Intersection density was inversely associated with CO2 emissions (b: -0.769--0.924) in suburban areas	3.5	+
102	Density (housing)	Environmental benefits (CO2 emission)	Guo, J, Liu, H, Jiang, Y, He, D, Wang, Q, Meng, F, He, K. (2014) Neighborhood Form and CO2 Emission: Evidence from 23 Neighborhoods in Jinan, China. Frontiers of Environmental Science and Technology, 8(1): 79-88.	http://link.springer.com/article/10.1007%2Fs11783-013-0516-1	4169 households from 23 neighborhoods, Respondents aged 20 to 65. Jinnan, China	In-home and transportation energy consumption and CO2 emissions were modeled with using univariate regression models (For models with environmental IVs neighborhood was the analytical unit)	Housing density was inversely associated with CO2 emission (b=-0.1415)	3.5	+
103	Mixed use	Environmental benefits (CO2 emission)	Guo, J, Liu, H, Jiang, Y, He, D, Wang, Q, Meng, F, He, K. (2014) Neighborhood Form and CO2 Emission: Evidence from 23 Neighborhoods in Jinan, China. Frontiers of Environmental Science and Technology, 8(1): 79-88.	http://link.springer.com/article/10.1007%2Fs11783-013-0516-1	4169 households from 23 neighborhoods, Respondents aged 20 to 65. Jinnan, China	In-home and transportation energy consumption and CO2 emissions were modeled with using univariate regression models (For models with environmental IVs neighborhood was the analytical unit)	Land use mix was inversely associated with CO2 emission (b=-8.2184)	3.5	+
104	Density (residential)	Environmental benefits (household fuel usage)	Brownstone, D & Golob, TF. (2009). The Impact of residential Density on Vehicle Usage and Energy Consumption. Journal of Urban Economics, 65: 91-98.	http://www.sciencedirect.com/science/article/pii/S0094119008001095	NHTS California households (n=2583). California, USA	Simultaneous equation model with bootstrapping with three endogenous variables and several exogenous variables	Residential density was inversely associated with household fuel usage (regression coefficient =-64.7)	3.5	+
105	Density (residential)	Environmental benefits (total mileage on all household vehicles)	Brownstone, D & Golob, TF. (2009). The Impact of residential Density on Vehicle Usage and Energy Consumption. Journal of Urban Economics, 65: 91-98.	http://www.sciencedirect.com/science/article/pii/S0094119008001095	NHTS California households (n=2583). California, USA	Simultaneous equation model with bootstrapping with three endogenous variables and several exogenous variables	Residential density was inversely associated with total mileage (regression coefficient =-1171)	3.5	+
106	Mixed use (residential and occupationally matched jobs)	Environmental benefits (VMT(Ln))	Cervero, R & Duncan, M. (2006). Which Reduces Vehicle Travel More: Jobs-Housing Balance or Retail-Housing Mixing? Journal of the American Planning Association, 72: 475-490.	http://www.tandfonline.com/doi/abs/10.1080/01944360608976767#.UsySn9IW2Ds	2000 May Area Travel Survey of residents from 16000 randomly sampled households (Mean age=42.7 yr; 54% male; 6% Latino). Bay Area, CA, USA	Observational (cross-sectional) study based on existing data	Occupationally matched jobs within 4 miles (Ln) was inversely associated with VMT(Ln) (b=-0.329)	3.5	+
107	Mixed use (residential and total jobs)	Environmental benefits (VMT(Ln))	Cervero, R & Duncan, M. (2006). Which Reduces Vehicle Travel More: Jobs-Housing Balance or Retail-Housing Mixing? Journal of the American Planning Association, 72: 475-490.	http://www.tandfonline.com/doi/abs/10.1080/01944360608976767#.UsySn9IW2Ds	2000 May Area Travel Survey of residents from 16000 randomly sampled households (Mean age=42.7 yr; 54% male; 6% Latino). Bay Area, CA, USA	Observational (cross-sectional) study based on existing data	Total jobs within 4 miles (Ln) was inversely associated with VMT(Ln) (b=-0.299)	3.5	+
108	Mixed use (residential and occupationally matched jobs)	Environmental benefits (VHT (Vehicle hours travel) Ln)	Cervero, R & Duncan, M. (2006). Which Reduces Vehicle Travel More: Jobs-Housing Balance or Retail-Housing Mixing? Journal of the American Planning Association, 72: 475-490.	http://www.tandfonline.com/doi/abs/10.1080/01944360608976767#.UsySn9IW2Ds	2000 May Area Travel Survey of residents from 16000 randomly sampled households (Mean age=42.7 yr; 54% male; 6% Latino). Bay Area, CA, USA	Observational (cross-sectional) study based on existing data	Occupationally matched jobs within 4 miles (Ln) was inversely associated with VHT(Ln) (b=-0.338)	3.5	+
109	Mixed use (residential and total jobs)	Environmental benefits (VHT (Vehicle hours travel) Ln)	Cervero, R & Duncan, M. (2006). Which Reduces Vehicle Travel More: Jobs-Housing Balance or Retail-Housing Mixing? Journal of the American Planning Association, 72: 475-490.	http://www.tandfonline.com/doi/abs/10.1080/01944360608976767#.UsySn9IW2Ds	2000 May Area Travel Survey of residents from 16000 randomly sampled households (Mean age=42.7 yr; 54% male; 6% Latino). Bay Area, CA, USA	Observational (cross-sectional) study based on existing data	Total jobs within 4 miles (Ln) was inversely associated with VHT(Ln) (b=-0.306)	3.5	+
110	Mixed use (residential and retail)	Environmental benefits (VMT(Ln))	Cervero, R & Duncan, M. (2006). Which Reduces Vehicle Travel More: Jobs-Housing Balance or Retail-Housing Mixing? Journal of the American Planning Association, 72: 475-490.	http://www.tandfonline.com/doi/abs/10.1080/01944360608976767#.UsySn9IW2Ds	2000 May Area Travel Survey of residents from 16000 randomly sampled households (Mean age=42.7 yr; 54% male; 6% Latino). Bay Area, CA, USA	Observational (cross-sectional) study based on existing data	Retail and service jobs within 4 miles (Ln) was inversely associated with VMT(Ln) (b=-0.168)	3.5	+
111	Mixed use (residential and retail)	Environmental benefits (VHT (Vehicle hours travel) Ln)	Cervero, R & Duncan, M. (2006). Which Reduces Vehicle Travel More: Jobs-Housing Balance or Retail-Housing Mixing? Journal of the American Planning Association, 72: 475-490.	http://www.tandfonline.com/doi/abs/10.1080/01944360608976767#.UsySn9IW2Ds	2000 May Area Travel Survey of residents from 16000 randomly sampled households (Mean age=42.7 yr; 54% male; 6% Latino). Bay Area, CA, USA	Observational (cross-sectional) study based on existing data	Retail and service jobs within 4 miles (Ln) was inversely associated with VHT(Ln) (b=-0.137)	3.5	+
112	Density (residential)	Environmental benefits (energy from motorized transport)	Frank, LD, Greenwald, MJ, Winkelman, S, Chapman, J, & Kavage, S. (2010). Carbonless Footprints: Promoting Health and Climate Stabilization through Active Transportation. Preventive Medicine, 50: S99-S105.	http://www.sciencedirect.com/science/article/pii/S0091743509004873	Atlanta-based SMARTRAQ Travel Survey (n=10,148) Mean age 44.6 yr, 50% male, 72% white. Atlanta, GA, USA	Cross-sectional analysis of travel diary data	Net residential density was inversely and significantly associated with energy consumed from motorized transport (b=-0.04)	3.5	+
113	Mixed use	Environmental benefits (energy from motorized transport)	Frank, LD, Greenwald, MJ, Winkelman, S, Chapman, J, & Kavage, S. (2010). Carbonless Footprints: Promoting Health and Climate Stabilization through Active Transportation. Preventive Medicine, 50: S99-S105.	http://www.sciencedirect.com/science/article/pii/S0091743509004873	Atlanta-based SMARTRAQ Travel Survey (n=10,148) Mean age 44.6 yr, 50% male, 72% white. Atlanta, GA, USA	Cross-sectional analysis of travel diary data	Land use mix was inversely and significantly associated with energy consumed from motorized transport (b=-0.24)	3.5	+
114	Accessibility and connectivity (intersection density)	Environmental benefits (energy from motorized transport)	Frank, LD, Greenwald, MJ, Winkelman, S, Chapman, J, & Kavage, S. (2010). Carbonless Footprints: Promoting Health and Climate Stabilization through Active Transportation. Preventive Medicine, 50: S99-S105.	http://www.sciencedirect.com/science/article/pii/S0091743509004873	Atlanta-based SMARTRAQ Travel Survey (n=10,148) Mean age 44.6 yr, 50% male, 72% white. Atlanta, GA, USA	Cross-sectional analysis of travel diary data	Intersection density was inversely and significantly associated with energy consumed from motorized transport (b=-0.00)	3.5	+
115	Density (distance to activity centers)	Environmental benefits (energy from motorized transport)	Frank, LD, Greenwald, MJ, Winkelman, S, Chapman, J, & Kavage, S. (2010). Carbonless Footprints: Promoting Health and Climate Stabilization through Active Transportation. Preventive Medicine, 50: S99-S105.	http://www.sciencedirect.com/science/article/pii/S0091743509004873	Atlanta-based SMARTRAQ Travel Survey (n=10,148) Mean age 44.6 yr, 50% male, 72% white. Atlanta, GA, USA	Cross-sectional analysis of travel diary data	Auto traveling time to 5 major activity centers was not significantly associated with energy consumed from motorized transport (b=0.00)	3.5	0
116	Density (population)	Environmental benefits (CO2 emission)	Grazi, F, van den Bergh, JCJM, & van Ommeren, JN. (2008). An Empirical Analysis of Urban Form, Transport, and Global Warming. Energy Journal, 29: 97-122.	http://econpapers.repec.org/article/aenjournl/2008v29-04-a05.htm	1998 Dutch housing Survey and 2005 CO2 emission data for the Netherlands (sample n and characteristics N/A)	Observational analysis of existing data	Urban density was inversely associated with CO2 emissions (47% lower in the "very high" density compared to the "very low" density level	3.5	+
117	Density (residential)	Environmental benefits (energy use for everyday travel)	Holden, E, & Norland, IT. (2005). Three Challenges for the Compact City as a Sustainable Urban Form: Household Consumption of Energy and Transport in Eight Residential Areas in the Greater Oslo Region. Urban Studies, 42: 2145-2166.	http://usj.sagepub.com/content/42/12/2145.short?rss=1&ssource=mfr	Surveys (n and characteristics not reported). The Greater Oslo Region, Norway.	Survey data (primary data collection) and cross-sectional analysis	Housing density in residential area was not significantly associated with everyday travel energy expenditure	3.5	0
118	Mixed use	Environmental benefits (energy use for everyday travel)	Holden, E, & Norland, IT. (2005). Three Challenges for the Compact City as a Sustainable Urban Form: Household Consumption of Energy and Transport in Eight Residential Areas in the Greater Oslo Region. Urban Studies, 42: 2145-2166.	http://usj.sagepub.com/content/42/12/2145.short?rss=1&ssource=mfr	Surveys (n and characteristics not reported). The Greater Oslo Region, Norway.	Survey data (primary data collection) and cross-sectional analysis	Local mix (percentage of developed area for housing within a residential area) was not significantly associated with everyday travel energy expenditure	3.5	0
119	Mixed use (distance from residence to the city center)	Environmental benefits (energy use for everyday travel)	Holden, E, & Norland, IT. (2005). Three Challenges for the Compact City as a Sustainable Urban Form: Household Consumption of Energy and Transport in Eight Residential Areas in the Greater Oslo Region. Urban Studies, 42: 2145-2166.	http://usj.sagepub.com/content/42/12/2145.short?rss=1&ssource=mfr	Surveys (n and characteristics not reported). The Greater Oslo Region, Norway.	Survey data (primary data collection) and cross-sectional analysis	Distance to the city center was significantly associated with higher everyday travel energy expenditure (b=108)	3.5	+
120	Mixed use (distance from residence to local sub-center)	Environmental benefits (energy use for everyday travel)	Holden, E, & Norland, IT. (2005). Three Challenges for the Compact City as a Sustainable Urban Form: Household Consumption of Energy and Transport in Eight Residential Areas in the Greater Oslo Region. Urban Studies, 42: 2145-2166.	http://usj.sagepub.com/content/42/12/2145.short?rss=1&ssource=mfr	Surveys (n and characteristics not reported). The Greater Oslo Region, Norway.	Survey data (primary data collection) and cross-sectional analysis	Distance to the local sub- center was significantly associated with higher everyday travel energy expenditure (b=233)	3.5	+
121	Density (residential)	Environmental benefits (total energy use per capital)	Holden, E, & Norland, IT. (2005). Three Challenges for the Compact City as a Sustainable Urban Form: Household Consumption of Energy and Transport in Eight Residential Areas in the Greater Oslo Region. Urban Studies, 42: 2145-2166.	http://usj.sagepub.com/content/42/12/2145.short?rss=1&ssource=mfr	Surveys (n and characteristics not reported). The Greater Oslo Region, Norway.	Survey data (primary data collection) and cross-sectional analysis	(non-linear) U shape association between density and total energy (R2=0.24)	3.5	0
122	Density (population)	Environmental benefits (energy consumption)	Liu, C & Shen, Q. (2011). An Empirical Analysis of the Influence of Urban Form on Household Travel and Energy Consumption. Computers, Environment and Urban Systems, 35: 347-357.	http://www.sciencedirect.com/science/article/pii/S0198971511000561	National Household Travel Survey (NHTS) national dataset and regional add-on data n=2806. Baltimore, MD, USA	Structural Equation Modeling (SEM) with multiple exogenous variables (including sociodemographic and urban form) and endogenous variables (travel-related behaviors)	Density had no direct effect on VMT and energy consumption, but it had a significant indirect and total effect on energy consumption through other variables such as travel speed, car (fuel efficiency) choice and walking.	3.5	0
123	Density (population)	Environmental benefits (gasoline use)	Newman, PWG & Kenworthy, JR. (1989). Gasoline Consumption and Cities. Journal of the American Planning Association, 55: 24-37.	http://www.tandfonline.com/doi/abs/10.1080/01944368908975398#.UszqDdKSxvE	City-level data (n=32), sample characteristics N/A. 32 international cities.	Cross-sectional analysis of city-level data	Population density was inversely associated with gasoline use (r=0.578)	3.5	+
124	Mixed use (job density)	Environmental benefits (gasoline use)	Newman, PWG & Kenworthy, JR. (1989). Gasoline Consumption and Cities. Journal of the American Planning Association, 55: 24-37.	http://www.tandfonline.com/doi/abs/10.1080/01944368908975398#.UszqDdKSxvE	City-level data (n=32), sample characteristics N/A. 32 international cities.	Cross-sectional analysis of city-level data	Job density was inversely associated with gasoline use (r=-0.657)	3.5	+
125	Mixed use (distance to work)	Environmental benefits (gasoline use)	Newman, PWG & Kenworthy, JR. (1989). Gasoline Consumption and Cities. Journal of the American Planning Association, 55: 24-37.	http://www.tandfonline.com/doi/abs/10.1080/01944368908975398#.UszqDdKSxvE	City-level data (n=32), sample characteristics N/A. 32 international cities.	Cross-sectional analysis of city-level data	Distance to work was positively associated with gasoline use (r=0.762)	3.5	+
126	Density (population)	Environmental benefits (energy consumption)	Mindali, O, Raveh, A, & Salomon, I. (2004). Urban Density and Energy Consumption: A New Look at Old Statistics. Transportation Research Part A: Policy and Practice, 38: 143-162.	http://www.sciencedirect.com/science/article/pii/S0965856403000946	City-level data (n=32), sample characteristics N/A. 32 international cities.	Cross-sectional analysis of city-level data (re-analysis using innovative methods "Co-Plot" of data from Newman 1989)	Population density was not significantly associated with per capita energy use	3.5	0
127	Mixed use (employment density)	Environmental benefits (energy consumption)	Mindali, O, Raveh, A, & Salomon, I. (2004). Urban Density and Energy Consumption: A New Look at Old Statistics. Transportation Research Part A: Policy and Practice, 38: 143-162.	http://www.sciencedirect.com/science/article/pii/S0965856403000946	City-level data (n=32), sample characteristics N/A. 32 international cities.	Cross-sectional analysis of city-level data (re-analysis using innovative methods "Co-Plot" of data from Newman 1989)	Employment density was not significantly associated with per capita energy use	3.5	0
128	Density (residential)	Environmental benefits (automotive green house gas emissions)	Norman, J, MacLean, H, & Kennedy, C. (2006). Comparing High and Low Residential Density: Life-Cycle Analysis of Energy Use and Greenhouse Gas Emissions. Journal of Urban Planning and Development, 132: 10-21.	http://ascelibrary.org/doi/abs/10.1061/(ASCE)0733-9488(2006)132%3A1(10)	N/A ( comparing development sites). Toronto, Canada	Life-cycle assessment to estimate energy use and GHG emission (case study)	Low density sites had much higher auto transportation GHG emission/person compared with high density sites (5180 vs. 1420)	3.5	+
129	Density (residential)	Environmental benefits (public transit green house gas emissions)	Norman, J, MacLean, H, & Kennedy, C. (2006). Comparing High and Low Residential Density: Life-Cycle Analysis of Energy Use and Greenhouse Gas Emissions. Journal of Urban Planning and Development, 132: 10-21.	http://ascelibrary.org/doi/abs/10.1061/(ASCE)0733-9488(2006)132%3A1(10)	N/A ( comparing development sites). Toronto, Canada	Life-cycle assessment to estimate energy use and GHG emission (case study)	Low density sites had much higher public transit GHG emission/person compared with high density sites (130 vs. 20)	3.5	+
130	Density (residential)	Environmental benefits (automotive green house gas emissions)	Norman, J, MacLean, H, & Kennedy, C. (2006). Comparing High and Low Residential Density: Life-Cycle Analysis of Energy Use and Greenhouse Gas Emissions. Journal of Urban Planning and Development, 132: 10-21.	http://ascelibrary.org/doi/abs/10.1061/(ASCE)0733-9488(2006)132%3A1(10)	N/A ( comparing development sites). Toronto, Canada	Life-cycle assessment to estimate energy use and GHG emission (case study)	Low density sites had much higher auto transportation GHG emission/m2 compared with high density sites (64.4 vs. 33.0)	3.5	+
131	Density (residential)	Environmental benefits (public transit green house gas emissions)	Norman, J, MacLean, H, & Kennedy, C. (2006). Comparing High and Low Residential Density: Life-Cycle Analysis of Energy Use and Greenhouse Gas Emissions. Journal of Urban Planning and Development, 132: 10-21.	http://ascelibrary.org/doi/abs/10.1061/(ASCE)0733-9488(2006)132%3A1(10)	N/A ( comparing development sites). Toronto, Canada	Life-cycle assessment to estimate energy use and GHG emission (case study)	Low density sites had much higher public transit GHG emission/m2 compared with high density sites (1.6 vs. 0.5)	3.5	+
132	Density (residential)	Environmental benefits (public transit green house gas emissions)	Norman, J, MacLean, H, & Kennedy, C. (2006). Comparing High and Low Residential Density: Life-Cycle Analysis of Energy Use and Greenhouse Gas Emissions. Journal of Urban Planning and Development, 132: 10-21.	http://ascelibrary.org/doi/abs/10.1061/(ASCE)0733-9488(2006)132%3A1(10)	N/A ( comparing development sites). Toronto, Canada	Life-cycle assessment to estimate energy use and GHG emission (case study)	Low density sites had much higher total GHG emission/person compared with high density sites (8637 vs. 3341)	3.5	+
133	Density (residential)	Environmental benefits (automotive green house gas emissions)	Norman, J, MacLean, H, & Kennedy, C. (2006). Comparing High and Low Residential Density: Life-Cycle Analysis of Energy Use and Greenhouse Gas Emissions. Journal of Urban Planning and Development, 132: 10-21.	http://ascelibrary.org/doi/abs/10.1061/(ASCE)0733-9488(2006)132%3A1(10)	N/A ( comparing development sites). Toronto, Canada	Life-cycle assessment to estimate energy use and GHG emission (case study)	Low density sites had much higher total GHG emission/m2 compared with high density sites (107.3 vs. 77.7)	3.5	+
134	Density (residential)	Environmental benefits (CO2 emission)	Reckien, D, Ewald, M, Edenhofer, O, & Liideke, MKB. (2007). What Parameters Influence the Spatial Variations in CO2 Emissions from Road Traffic in Berlin? Implications for Urban Planning to Reduce Anthropogenic CO2 Emissions. Urban Studies, 44: 339-355.	http://usj.sagepub.com/content/44/2/339.refs	Department of Urban Development and traffic monitoring data at the district level (n=23), characteristics N/A. Berlin, Germany	Cross-sectional analysis based on existing data	A positive association between residential density and CO2 emission of the district.	3.5	-
135	Mixed use	Environmental benefits (CO2 emission)	Reckien, D, Ewald, M, Edenhofer, O, & Liideke, MKB. (2007). What Parameters Influence the Spatial Variations in CO2 Emissions from Road Traffic in Berlin? Implications for Urban Planning to Reduce Anthropogenic CO2 Emissions. Urban Studies, 44: 339-355.	http://usj.sagepub.com/content/44/2/339.refs	Department of Urban Development and traffic monitoring data at the district level (n=23), characteristics N/A. Berlin, Germany	Cross-sectional analysis based on existing data	Area of mixed use was not significantly associated with CO2 emission at the district level	3.5	0
136	Mixed use (residential land use)	Environmental benefits (CO2 emission)	Reckien, D, Ewald, M, Edenhofer, O, & Liideke, MKB. (2007). What Parameters Influence the Spatial Variations in CO2 Emissions from Road Traffic in Berlin? Implications for Urban Planning to Reduce Anthropogenic CO2 Emissions. Urban Studies, 44: 339-355.	http://usj.sagepub.com/content/44/2/339.refs	Department of Urban Development and traffic monitoring data at the district level (n=23), characteristics N/A. Berlin, Germany	Cross-sectional analysis based on existing data	Area of residential use was not significantly associated with CO2 emission at the district level	3.5	0
137	Mixed use (business land use)	Environmental benefits (CO2 emission)	Reckien, D, Ewald, M, Edenhofer, O, & Liideke, MKB. (2007). What Parameters Influence the Spatial Variations in CO2 Emissions from Road Traffic in Berlin? Implications for Urban Planning to Reduce Anthropogenic CO2 Emissions. Urban Studies, 44: 339-355.	http://usj.sagepub.com/content/44/2/339.refs	Department of Urban Development and traffic monitoring data at the district level (n=23), characteristics N/A. Berlin, Germany	Cross-sectional analysis based on existing data	Area of business use was not significantly associated with CO2 emission at the district level	3.5	0
138	Density; Mixed use; Accessibility and connectivity (compact growth)	Environmental benefits (CO2 emission)	Stone, B, Mednick, AC, Holloway, T, & Spak, SN. (2007). Is Compact Growth Good for Air Quality? Journal of the American Planning Association, 73: 404-418.	http://www.tandfonline.com/doi/abs/10.1080/01944360708978521#.Us433dKSxvE	N/A ( comparing scenarios). Midwestern USA.	Scenario analysis: associating future (50 yr) air quality with land use development scenarios	Median reduction of CO2 under compact growth (CG) scenario was 5.1%	3.5	+
139	Density	Environmental benefits (VMT)	Stone, B, Mednick, AC, Holloway, T, & Spak, SN. (2007). Is Compact Growth Good for Air Quality? Journal of the American Planning Association, 73: 404-418.	http://www.tandfonline.com/doi/abs/10.1080/01944360708978521#.Us433dKSxvE	N/A ( comparing scenarios). Midwestern USA.	Scenario analysis: associating future (50 yr) air quality with land use development scenarios	Density was associated with lower VMT (elasticity=-0.35--a 10% increase in mean tract level density is to be associated with a 3.5% reduction in VMT)	3.5	+
140	Mixed use (distance to work)	Environmental benefits (CO2 emission)	Susilo, Y, & Stead, D. (2007). Urban Form, Vehicle Emissions and Energy Use of Commuters in the Netherlands. The European Council for an Energy Efficient Economy (ECEEE) 2007 Summer Study. La Colle sur Loup, France.	http://www.eceee.org/library/conference_proceedings/eceee_Summer_Studies/2007/Panel_8/8.012	Dutch National Travel Survey (no sampling characteristics reported). The Netherlands.	Analyses of existing data by year	A 1-km increase in travel to work distance was associated with 201g increase in commuters' daily CO2 emissions in 1995	3	+
141	Mixed use (distance to work)	Environmental benefits (CO2 emission)	Susilo, Y, & Stead, D. (2007). Urban Form, Vehicle Emissions and Energy Use of Commuters in the Netherlands. The European Council for an Energy Efficient Economy (ECEEE) 2007 Summer Study. La Colle sur Loup, France.	http://www.eceee.org/library/conference_proceedings/eceee_Summer_Studies/2007/Panel_8/8.012	Dutch National Travel Survey (no sampling characteristics reported). The Netherlands.	Analyses of existing data by year	A 1-km increase in travel to work distance was associated with 224g increase in commuters' daily CO2 emissions in 2000	3	+
142	Mixed use (distance to work)	Environmental benefits (CO2 emission)	Susilo, Y, & Stead, D. (2007). Urban Form, Vehicle Emissions and Energy Use of Commuters in the Netherlands. The European Council for an Energy Efficient Economy (ECEEE) 2007 Summer Study. La Colle sur Loup, France.	http://www.eceee.org/library/conference_proceedings/eceee_Summer_Studies/2007/Panel_8/8.012	Dutch National Travel Survey (no sampling characteristics reported). The Netherlands.	Analyses of existing data by year	A 1-km increase in travel to work distance was associated with 231g increase in commuters' daily CO2 emissions in 2005	3	+
143	Density; Mixed use; Accessibility and connectivity (urbanicity)	Environmental benefits (CO2 emission)	Susilo, Y, & Stead, D. (2007). Urban Form, Vehicle Emissions and Energy Use of Commuters in the Netherlands. The European Council for an Energy Efficient Economy (ECEEE) 2007 Summer Study. La Colle sur Loup, France.	http://www.eceee.org/library/conference_proceedings/eceee_Summer_Studies/2007/Panel_8/8.012	Dutch National Travel Survey (no sampling characteristics reported). The Netherlands.	Analyses of existing data by year	There was a significant inverse association between level of urbanization and commuters' daily CO2 emissions	3	+
144	Mixed use (infill/compact development)	Environmental benefits (VMT)	Bartholomew, K, & Ewing, R. (2009). Land Use-Transportation Scenarios and Future Vehicle Travel and Land Consumption: A Meta-Analysis. Journal of the American Planning Association, 75: 13-27.	http://faculty.arch.utah.edu/bartholomew/Individual%20Files/08_Scenario_JAPA.pdf	USA	Meta-analysis of scenario planning projects (85 scenarios in 23 planning studies)	Infill/compact development planning scenarios predicted lower VMT (coefficient=-1.50)	3.5	+
145	Mixed use	Environmental benefits (VMT)	Bartholomew, K, & Ewing, R. (2009). Land Use-Transportation Scenarios and Future Vehicle Travel and Land Consumption: A Meta-Analysis. Journal of the American Planning Association, 75: 13-27.	http://faculty.arch.utah.edu/bartholomew/Individual%20Files/08_Scenario_JAPA.pdf	USA	Meta-analysis of scenario planning projects (85 scenarios in 23 planning studies)	Mixed use development planning scenarios predicted lower VMT (coefficient=-4.64)	4.5	+
146	Density (residential)	Environmental benefits (green house gas emissions)	Brown, MA, & Southworth, F. (2008). Mitigating Climate Change through Green Buildings and Smart Growth. Environment and Planning A, 40: 653-675.	http://www.envplan.com/abstract.cgi?id=a38419	International	Narrative review of studies and policies	Higher density is associated with lower GHG emissions	2	+
147	Density	Environmental benefits (green house gas emissions)	Dulal, HB, Brodnig, G, & Onoriose, CG. (2011). Climate Change Mitigation in the Transport Sector through Urban Planning: A Review. Habitat International, 35: 494-500.	http://www.sciencedirect.com/science/article/pii/S0197397511000105	International	Narrative review of studies and policies	A combination of high residential and employment density is associated with lower GHGs emissions	2	+

## Sheet: Transportation
TRANSPORTATION
RESOURCE #	FEATURE	CO-BENEFIT	RESOURCE	LINK	SAMPLE CHARACTERISTICS	METHODS	FINDINGS	GRADING THE EVIDENCE	DIRECTION OF ASSOCIATION
1	Traffic calming; Pedestrian infrastructure (sidewalks)	Injury prevention	Retting, RA, Ferguson, SA, & McCartt, AT. (2003). A Review of Evidence-based Traffic Engineering Measures Designed to Reduce Pedestrian-Motor Vehicle Crashes. American Journal of Public Health, 93(9), 1453-1463.	http://www.ncbi.nlm.nih.gov/pmc/articles/PMC1447993/pdf/0931456.pdf	All ages. International (United States, Germany, Netherlands, Sweden, United Kingdom, Canada, Israel, Japan, Australia).	Non-systematic review using Transportation Research Information Services database (23 studies - international) for studies on engineering countermeasures.	Modification of the built environment can substantially reduce the risk of pedestrian-vehicle crashes. Highly effective countermeasures include: single-lane roundabouts, sidewalks, exclusive pedestrian signal phasing, pedestrian refuge islands and increased intensity of roadway lighting.	4	+
2	Traffic calming	Injury prevention	Bunn, F, Collier, T, Frost, C, Ker, K, Roberts, I, & Wentz, R. (2003). Area-wide Traffic Calming for Preventing Traffic Related Injuries. Cochrane Database of Systematic Reviews, (1), CD003110.	http://www.ncbi.nlm.nih.gov/pubmed/12535454	All ages. International (Germany, United Kingdom, Australia, Netherlands).	Systematic review of 5 databases (16 studies - international) of controlled before-after trials.	Area-wide traffic calming in towns and cities may be a promising intervention for reducing the number of road traffic injuries and deaths.	4.5	weak +
3	Safe routes to school	Injury prevention	Dimaggio, C & Li, G. (2013). Effectiveness of a safe routes to school program in preventing school-aged injury. Pediatrics, 131(2), 290-296.	http://www.ncbi.nlm.nih.gov/pubmed/23319533	168,806 pedestrian injuries in New York City between 2001-2010	Quasi-experimental. Pre- and post-SRTS intervention (2005), compared to census tracts without STS interventions.	After SRTS interventions, annual rate of pedestrian injury decreased 33% (95% confidence interval [CI]: 30 to 36) among school-aged children (5- to 19-year-olds) and 14% (95% CI: 12 to 16) in other age groups. Annual rate of school-aged pedestrian injury during school-travel hours decreased 44% (95% CI: 17 to 65) from 8.0 injuries per 10,000 population in the pre-intervention period (2001-2008) t…	3.5	+
4	Traffic calming	Injury prevention	Macdonald, E, Sanders, R, & Supawanich, P. (2008). The Effects of Transportation Corridors' Roadside Design Features on User Behavior and Safety, and their Contributions to Health, Environmental Quality, and Community Economic Vitality: A Literature Review (UCTC Research Paper No. 878). Berkeley, CA: University of California Transportation Center.	http://www.uctc.net/papers/878.pdf	All ages. International.	Non-systematic review (180 studies/reports - international) of studies dealing with the effects of transportation corridors' features	The research was clear that there is no one-size-fits-all traffic calming treatment, but that a combination of pedestrian safety enhancements, when thoughtfully implemented, holds promise for improving pedestrian safety.	4	weak +
5	Crosswalk markings	Injury prevention	Macdonald, E, Sanders, R, & Supawanich, P. (2008). The Effects of Transportation Corridors' Roadside Design Features on User Behavior and Safety, and their Contributions to Health, Environmental Quality, and Community Economic Vitality: A Literature Review	http://www.uctc.net/papers/878.pdf	All ages. International.	Non-systematic review (180 studies/reports - international) of studies dealing with the effects of transportation corridors' features	Pedestrians often have a false sense of security at marked but unsignalized crosswalks, leading them to be less cautious of passing traffic than they perhaps should be. Other pieces documented that many drivers often ignore pedestrian right-of-way rules and fail to stop for pedestrians waiting at crossings. At unsignalized crossings, crosswalk markings should be installed along with ancillary tra…	4	-
6	Pedestrian/bicycle infrastructure (bike lanes)	Physical activity; Public opinion polling	Macdonald, E, Sanders, R, & Supawanich, P. (2008). The Effects of Transportation Corridors' Roadside Design Features on User Behavior and Safety, and their Contributions to Health, Environmental Quality, and Community Economic Vitality: A Literature Review	http://www.uctc.net/papers/878.pdf	All ages. International.	Non-systematic review (180 studies/reports - international) of studies dealing with the effects of transportation corridors' features	Well marked on-street bicycle lanes tend to be preferred by the majority of bicyclists, and may even encourage more people to cycle.	4	weak +
7	Traffic calming (road diet)	Injury prevention	U.S. Department of Transportation, Federal Highway Administration, Highway Safety Information System. (2010). Evaluation of Lane Reduction “Road Diet” Measures on Crashes Summary Report. McLean, VA: Research, Development, and Technology Turner-Fairbank Highway Research Center.	http://www.fhwa.dot.gov/publications/research/safety/10053/10053.pdf	All ages. Washington and California.	Quasi-experimental, pre- and post-treatment with matched control comparison sites.	Road diets typically reduce crash rates by 47% on major highways through small urban areas, by 19% on corridors in larger city suburban areas, and 29% overall.	3	+
8	Pedestrian/bicycle infrastructure (complete streets); Traffic speeds	Injury prevention	U.S. Department of Transportation, Federal Highway Administration, Highway Safety Information System. (2010). Evaluation of Lane Reduction “Road Diet” Measures on Crashes Summary Report. McLean, VA: Research, Development, and Technology Turner-Fairbank Highway Research Center.	http://www.fhwa.dot.gov/publications/research/safety/10053/10053.pdf	All ages. Washington and California.	Quasi-experimental, pre- and post-treatment with matched control comparison sites.	Lower traffic speeds as a result of complete streets tend to reduce traffic collision rates and severity, and therefore crash costs, particularly injury risk for pedestrians and cyclists.	3	+
9	Pedestrian/bicycle infrastructure (complete streets); Traffic speeds	Environmental benefits	Litman, T. (2013). Evaluating Complete Streets: The Value of Designing Roads for Diverse Modes, Users and Activities. Victoria, B.C.: Victoria Transport Policy Institute.	http://www.vtpi.org/compstr.pdf	All ages. United States.	Non-systematic review of studies/reports of complete street impacts	By reducing traffic speeds and total motor vehicle travel, and improving bus flow, complete streets tend to reduce local air and noise pollution.	2	+
10	Pedestrian/bicycle infrastructure (complete streets); Traffic speeds	Economics: Land value	Litman, T. (2013). Evaluating Complete Streets: The Value of Designing Roads for Diverse Modes, Users and Activities. Victoria, B.C.: Victoria Transport Policy Institute.	http://www.vtpi.org/compstr.pdf	All ages. United States.	Non-systematic review of studies/reports of complete street impacts	By improving livability, complete streets can increase local business activity and property values.	2	+
11	Pedestrian/bicycle infrastructure (complete streets); Traffic speeds	Social benefits; Injury prevention	Litman, T. (2013). Evaluating Complete Streets: The Value of Designing Roads for Diverse Modes, Users and Activities. Victoria, B.C.: Victoria Transport Policy Institute.	http://www.vtpi.org/compstr.pdf	All ages. United States.	Non-systematic review of studies/reports of complete street impacts	By increasing use of alternative modes, complete streets can increase community cohesion (positive interactions among neighbors due to more walking on local streets) which tends to increase security.	2	+
12	Public transportation; Pedestrian/bicycle infrastructure (complete streets)	Economics: Economic performance of cities	Sisiopiku, VP, Imran, MS, & Muqueet Abro, A. (2012). Impacts of Transit in a Complete-Streets Context (UTCA Report No. 11206). Birmingham, AL: University of Alabama at Birmingham, University Transportation Center for Alabama.	http://ntl.bts.gov/lib/44000/44700/44727/UTCA_Project__11206.pdf	Bus transit system and impact of proposed transit improvement plan (Bus Transit-oriented Development) in Fairfield, AL (91% black/African American; 21.5% of population under poverty line)	Case study and economic modeling (benefit-cost analysis) of proposed transit improvements over 12 years	The benefit-cost ratio for the project has been calculated as 2.05 (every $1 dollar of investment, proposed project expected to generate $2.05 in return). Almost linear relationship between B/C ratio and % ridership shift from auto to transit was found. Sidewalks have been considered for all the roadways without sidewalks to increase Fairfield’s walkability. It would cost about $26.9 million to i…	2	+
13	Safe routes to school	Injury prevention	Delaney, A, Newstead, S, & Corben, B. (2004). Outcome Evaluation of the Effectiveness of the Safe Routes to School Program (Report No. 225). Victoria, Australia: Monash University Accident Research Center.	http://www.monash.edu.au/miri/research/reports/muarc225.pdf	School-aged children (5-13 years) in Victoria, Australia	Quasi-experimental, pre- and post-SRTS intervention (1990 - 1998) and control design	The SRTS program was associated with reductions in casualty crash frequency of 12.6 and 17.9 percent for primary school-aged pedestrians and bicyclists travelling at all times and at school travel times only respectively.	3	+
14	Traffic calming	Injury prevention	Rothman, L, Buliung, R, Macarthur, C, To, T, & Howard, A. (2013, epub). Walking and Child Pedestrian Injury: A Systematic Review of Built Environment Correlates of Safe Walking. Injury Prevention. doi:10.1136/injuryprev-2012-040701	http://injuryprevention.bmj.com/content/early/2013/05/23/injuryprev-2012-040701.abstract	Literature review of walking and child pedestrian (age 0 - 12) injury studies. International	Systematic review (85 studies)	Only traffic calming and presence of playgrounds/recreation areas were consistently associated with more walking and less pedestrian injury.	4.5	+
15	Traffic volume	Physical health (obesity)	Jerrett, M., McConnell, R., Chang, C.C.R., Wolch, J., Reynolds, K., Lurmann, F., et al. (2010). Automobile Traffic Around the Home and Attained Body Mass Index: A Longitudinal Cohort Study of Children Aged 10-18 Years. Preventive Medicine, 50(S1), S50-S58.	http://www.sciencedirect.com/science/article/pii/S0091743509004885	3,318 children (tracked from ages 9-10 to 18 years old) within 200 miles of Los Angeles, CA.	Prospective cohort; objective measures of height/weight; GIS analysis of built environment around child's home and school	The size of the traffic density effect is about 0.27 BMI attained units over the 10–90th percentile of the 150 m traffic distribution. This translates into about a 5% increase in attained BMI at age 18.	3.5	+
16	Pedestrian/bicycle infrastructure (bike lanes)	Economic benefits: Health care costs, Economic performance of cities	Gotschi, T. (2011). Costs and Benefits of Bicycling Investments in Portland, Oregon. Journal of Physical Activity and Health, 8(Suppl 1), S49-S58.	http://journals.humankinetics.com/jpah-supplements-special-issues/jpah-volume-8-supplement-january/costs-and-benefits-of-bicycling-investments-in-portland-oregon	All ages in Portland, OR.	Modeling study using the cost of past and future bicycle investments compared to health care cost savings and reduction in mortality (monetized as statistical lives) and with fuel cost savings; Estimated over 50-year period from 1991 to 2040	By 2040, investments in bike facilities in the range of $138 to $605 million will result in health care cost savings of $388 to $594 million, fuel savings of $143 to $218 million, and savings in value of statistical lives of $7 to $12 billion. The benefit-cost ratios for health care and fuel savings are between 3.8 and 1.2 to 1, and an order of magnitude larger when value of statistical lives is …	3.5	+
17	Pedestrian/bicycle infrastructure (sidewalks)	Economic benefits: Health care costs, Economic performance of cities; Environmental benefits (air quality)	Guo, JY & Gandavarapu, S. (2010). An Economic Evaluation of Health-promotive Built Environment Changes. Preventive Medicine, 50(Suppl 1), S44-S49.	http://www.sciencedirect.com/science/article/pii/S0091743509004769	2001 National Household Travel Survey sample (n = 4974) from Dane County, WI, supplemented with land information and construction costs used to model return on investment over 10 years.	Modeling of daily vehicle miles traveled and miles walked or biked to analyze travel impacts of hypothetical built environment changes (adding footpaths at least on one side to every road in county).	The total avoided medical cost accrued from the hypothetical sidewalk improvement was estimated to be approximately $90.93 million per year. The addition of sidewalks to all roadways would lead to a VMT reduction of 1.142 miles per person-day. This equates to a total of 182.938 million miles reduced across the entire population of Dane County during year 2002. Multiplying this VMT reduction amoun…	3.5	+
18	Pedestrian/bicycle infrastructure (sidewalks)	Economic benefits: Government costs (infrastructure)	Guo, JY & Gandavarapu, S. (2010). An Economic Evaluation of Health-promotive Built Environment Changes. Preventive Medicine, 50(Suppl 1), S44-S49.	http://www.sciencedirect.com/science/article/pii/S0091743509004769	2001 National Household Travel Survey sample (n = 4974) from Dane County, WI, supplemented with land information and construction costs used to model return on investment over 10 years.	Modeling of daily vehicle miles traveled and miles walked or biked to analyze travel impacts of hypothetical built environment changes (adding footpaths at least on one side to every road in county).	The cost of adding hypothetical sidewalks to one side of the county's roadways was about $450.83 million in 2002.	3.5	0 (descriptive)
19	Traffic volume (congestion)	Economic benefits: Economic performance of cites	United Nations Human Settlements Programme. (2013). Planning and Design for Sustainable Urban Mobility: Global Report on Human Settlements 2013. New York: Routledge.	http://www.unhabitat.org/pmss/listItemDetails.aspx?publicationID=3503	All ages. International.	Grey literature review	A further externality of private motorized transport is traffic congestion that imposes significant costs on economic efficiency as time lost due to congestion reduces productivity. Congestion costs in Canada are as high as US$4.5 billion nationally of which 80% is accounted for by the country’s three largest urban regions: Greater Toronto (43%), Montreal (21%) and Vancouver (17%). In the US, con…	4	+
20	Public transportation	Economic benefits: Economic performance of cites (jobs)	United Nations Human Settlements Programme. (2013). Planning and Design for Sustainable Urban Mobility: Global Report on Human Settlements 2013. New York: Routledge.	http://www.unhabitat.org/pmss/listItemDetails.aspx?publicationID=3503	All ages. International.	Grey literature review	It has been conservatively estimated that in 2009 the formal public transport sector accounted for about 13 million full-time equivalent jobs (as transport operators) worldwide. Of these jobs, some 7.3 million represent direct employment by public transport operators. The rest are employed directly by public author cities (300,000 people) or involved in the provision of goods and services to publ…	4	0 (descriptive)
21	Public transportation	Economic benefits: Economic performance of cites (jobs)	United Nations Human Settlements Programme. (2013). Planning and Design for Sustainable Urban Mobility: Global Report on Human Settlements 2013. New York: Routledge.	http://www.unhabitat.org/pmss/listItemDetails.aspx?publicationID=3503	All ages. International.	Grey literature review	The transport sector also often creates higher overall levels of income. In Geneva, it is estimated that for every US$1 invested, another US$3.8 of value added is created. Worldwide, it has been estimated that every US$1 of value created by public transport is linked to the further value creation of US$4. In addition, ‘every direct job in public transport is linked to four jobs in other sectors o…	4	+
22	Public transportation	Economic benefits: Economic performance of cites (jobs)	Smart Growth America. (2010). What We Learned from the Stimulus: And How to Use What We Learned to Speed Job Creation in the 2010 Jobs Bill. Washington, DC: Smart Growth America.	http://www.smartgrowthamerica.org/documents/010510_whatwelearned_stimulus.pdf	United States government spending	Grey literature analysis of US federal spending from 2009's American Recovery and Reinvestment Act (ARRA)	Through the end of 2009, ARRA investments in public transportation produced almost twice as many jobs per dollar as investments in roads: Every billion dollars spent on public transportation produced 19,299 job-months. Every billion dollars spent on projects funded under highway infrastructure programs produced 10,493 job-months.	2	+
23	Ciclovia & play streets	Social benefits (quality of life)	Sarmiento, OL, Schmid, TL, Parra, DC, Dias-del-Castillo, A, Fernando Gomez, L, Pratt, M, et al. (2010). Quality of Life, Physical Activity, and Built Environment Characteristics among Colombian Adults. Journal of Physical Activity and Health, 7(Suppl 2), S181-S195.	http://journals.humankinetics.com/jpah-back-issues/jpah-volume-7-supplement-july/quality-of-life-physical-activity-and-built-environment-characteristics-among-colombian-adults	1,334 adults from Bogota	Cross-sectional study using questionnaires and statistical analysis to assess associations between health-related quality of life, physical activity and built environment	Adults participating in the Ciclovía program at least 1 day per month were more likely to score higher on health-related quality of life measures than adults who reported no program participation. This association remained significant even after adjusting for sociodemographic, lifestyle, and built-environment factors.	3.5	+
24	Public transportation (bus)	Physical health	Sarmiento, OL, Schmid, TL, Parra, DC, Dias-del-Castillo, A, Fernando Gomez, L, Pratt, M, et al. (2010). Quality of Life, Physical Activity, and Built Environment Characteristics among Colombian Adults. Journal of Physical Activity and Health, 7(Suppl 2), S181-S195.	http://journals.humankinetics.com/jpah-back-issues/jpah-volume-7-supplement-july/quality-of-life-physical-activity-and-built-environment-characteristics-among-colombian-adults	1,334 adults from Bogota	Cross-sectional study using questionnaires and statistical analysis to assess associations between health-related quality of life, physical activity and built environment	Adults living in blocks with TransMilenio (bus rapid transit) stations were less likely to have higher scores of health-related quality of life (β = –2.2; P = .041). Likewise, adults living further than 500 m from TransMilenio stations were more likely to report perceiving their health status as good/excellent but this association was marginally significant.	3.5	-
25	Ciclovia & play streets	Economic benefits: Health care costs; Economic performance of cities	Montes, F, Sarmiento, OL, Zarama, R. (2011). Do Health Benefits Outweigh the Costs of Mass Recreational Programs? An Economic Analysis of Four Ciclovia Programs. Journal of Urban Health, 89(1), 153-170.	http://www.ncbi.nlm.nih.gov/pmc/articles/PMC3284592/	Participants (all ages) in Ciclovia programs in 4 international cities: Bogota and Medellin, Colombia; Guadalajara, Mexico; and San Francisco, US	Cost-benefit analysis of physical activity of Cicloia programs. Program director and intercept surveys of participants were used to collect data on the events.	The annual cost per capita of the programs was: US $6.0 for Bogotá, US $23.4 for Medellín, US $6.5 for Guadalajara, and US $70.5 for San Francisco. The cost–benefit ratio for health benefit from physical activity was 3.23–4.26 for Bogotá, 1.83 for Medellín, 1.02–1.23 for Guadalajara, and 2.32 for San Francisco.	3.5	+
26	Pedestrian/bicycle infrastructure (bike lanes)	Economic benefits: Government costs (infrastructure), Economic performance of cities	Lawrie, J, Guenther, J, Cook, T, & Meletiou, MP. (2004). The Economic Impact of Investments in Bicycle Facilities: A Case Study of the Northern Outer Banks. Raleigh, NC: North Carolina Department of Transportation.	http://www.ncdot.gov/bikeped/download/bikeped_research_eiafulltechreport.pdf	143 bicyclists (all ages) in Outer Banks region, NC	Economic impact analysis, using intercept surveys of bicyclists, to determine value of public investment in bike facilities.	A conservative estimate of the annual economic impact of the bicyclists is $60 million. The annual economic impact of cyclists is almost nine times as much as the one-time expenditure of public funds used to construct special bicycle facilities in the region.	3	+
27	Pedestrian/bicycle infrastructure (sidewalks, bike lanes)	Economic benefits: Government costs (infrastructure), Economic performance of cities	Davis, A. (2010). Value for Money: An Economic Assessment of Investment in Walking and Cycling. Bristol, UK: NHS Bristol.	http://www.thinkingtransport.org.au/sites/www.thinkingtransport.org.au/files/EXt%20-%202010-3%20-%20Economic%20Assessent%20of%20Walking%20and%20Cycling,%20Dr%20Adrian%20Davis.pdf	All ages. United Kingdom and beyond.	Grey literature, non-systematic review (n = 20) of peer-reviewed and grey literature related to cost-benefit analyses of investments in walking and bicycling.	Almost all of the studies identified (UK and beyond) report economic benefits of walking and bicycling interventions which are highly significant, and these average 13:1. For UK interventions only the average figure is higher, at 19:1.	2	+
28	Traffic calming (road diet); Pedestrian/bicycle infrastructure (bike lanes)	Economic benefits: Economic performance of cities	Rowe, K. (2013). Bikenomics. Measuring the Economic Impact of Bicycle Facilities on Neighborhood Business Districts. Seattle, WA: University of Washington.	http://cep.be.washington.edu/wp-content/uploads/2013/07/bikenomics_v2.pdf	Two projects (road diet, bike lane installation) in Seattle, WA.	Quasi-experimental/case study of business sales before and after bicycle infrastructure. Matched projects with comparison neighborhoods.	The loss of automobile travel lanes and three parking spots, and the addition of two bicycle lanes did not have a negative impact on the neighborhood business district in terms of taxable retail sales.	2	weak +
29	Public transportation	Social benefits (opinion polling)	Urban Land Institute. (2013). America in 2013: A ULI Survey on Views on Housing, Transportation and Community. Washington, DC: Urban Land Institute.	http://www.uli.org/research/centers-initiatives/terwilliger-center-for-housing/research/community-survey/	1,202 adults (18 years or older) in United States	Random telephone survey	Among those who say their community is served by public transit, 75% say they are satisfied with its quality. Among residents who are denied access to mass transit because their area does not offer it, half (51%) say they are dissatisfied with the lack of availability.	2	weak +
30	Safe routes to school; Pedestrian/bicycle infrastructure (sidewalks, bike lanes/facilities); Traffic calming	Injury prevention	Orenstein, MR, Gutierrez, N, Rice, TM, Cooper, JF, Ragland, DR. (2007). Safe Routes to School Safety & Mobility Analysis: Report to the California Legislature (Paper UCB-TSC-RR-2007-1). Berkeley, CA: UC Berkeley Traffic Safety Center.	http://escholarship.org/uc/item/5455454c	125 SRTS projects (70% elementary schools) in California.	Quasi-experimental (with controls) evaluation of pre-post SRTS projects	For the SR2S school areas, the overall change observed between the pre-intervention and the postintervention periods was a 13% reduction in annual numbers of injured child pedestrian/bicyclists. The 95% confidence interval for this figure is between 2% and 23%. The SR2S program made the most noticeable safety improvements among children ages 5 to 12, with an observed reduction in injuries of 27.6…	3	+
31	Public transportation (bus rapid transit)	Economics: Government costs (infrastructure)	Carrigan, A, King, R, Velasquez, JM, Raifman, M, & Duduta, N. (2013). Social, Environmental and Economic Impacts of BRT Systems: Bus Rapid Transit Case Studies from Around the World. Washington, DC: EMBARQ.	http://www.embarq.org/sites/default/files/Social-Environmental-Economic-Impacts-BRT-Bus-Rapid-Transit-EMBARQ.pdf	15 international BRT projects, with in-depth case studies in Bogota, Colombia, Mexico City, Mexico, Johannesburg, South Africa, and Istanbul, Turkey.	Cost-benefit analysis and modeling of BRT projects, and in-depth case study of 4 BRT projects.	Total BRT capital costs include busway infrastructure, stations, buses and technology systems such as passenger information and fare collection systems. These costs can vary from around USD 1 million per kilometer to USD 12 million per kilometer or more. The range of cost indicates the extent of the roadway improvements needed as well as the relative cost of labor and materials in each country. N…	4	+
32	Public transportation (bus rapid transit)	Environmental benefits	Carrigan, A, King, R, Velasquez, JM, Raifman, M, & Duduta, N. (2013). Social, Environmental and Economic Impacts of BRT Systems: Bus Rapid Transit Case Studies from Around the World. Washington, DC: EMBARQ.	http://www.embarq.org/sites/default/files/Social-Environmental-Economic-Impacts-BRT-Bus-Rapid-Transit-EMBARQ.pdf	15 international BRT projects, with in-depth case studies in Bogota, Colombia, Mexico City, Mexico, Johannesburg, South Africa, and Istanbul, Turkey.	Literature review, cost-benefit analysis and modeling of BRT projects, and in-depth case study of 4 BRT projects.	After the implementation of TransMilenio, Bogota reported a 43% decline in SO2 emissions, 18% decline in NOx, and a 12% decline in particulate matter. By reducing emissions of local air pollutants, especially of particulate matter, Metrobús Line 1 in Mexico City would eliminate more than 6,000 days of lost work, 12 new cases of chronic bronchitis, and three deaths per year saving an estimated USD…	4	+
33	Public transportation (bus rapid transit)	Environmental benefits	Carrigan, A, King, R, Velasquez, JM, Raifman, M, & Duduta, N. (2013). Social, Environmental and Economic Impacts of BRT Systems: Bus Rapid Transit Case Studies from Around the World. Washington, DC: EMBARQ.	http://www.embarq.org/sites/default/files/Social-Environmental-Economic-Impacts-BRT-Bus-Rapid-Transit-EMBARQ.pdf	15 international BRT projects, with in-depth case studies in Bogota, Colombia, Mexico City, Mexico, Johannesburg, South Africa, and Istanbul, Turkey.	Literature review, cost-benefit analysis and modeling of BRT projects, and in-depth case study of 4 BRT projects.	Eleven BRT systems across Mexico, Colombia, China, India and South Africa have registered their carbon dioxide equivalent (CO2e) missions reductions through the United Nations Framework Convention on Climate Change’s (UNFCCC) Clean Development Mechanism or other emissions verification schemes. Over the course of 10 to 20 years of the systems’ operations, starting as early as 2000, these registere…	4	+
34	Public transportation (bus rapid transit)	Economics: Land value	Carrigan, A, King, R, Velasquez, JM, Raifman, M, & Duduta, N. (2013). Social, Environmental and Economic Impacts of BRT Systems: Bus Rapid Transit Case Studies from Around the World. Washington, DC: EMBARQ.	http://www.embarq.org/sites/default/files/Social-Environmental-Economic-Impacts-BRT-Bus-Rapid-Transit-EMBARQ.pdf	15 international BRT projects, with in-depth case studies in Bogota, Colombia, Mexico City, Mexico, Johannesburg, South Africa, and Istanbul, Turkey.	Literature review, cost-benefit analysis and modeling of BRT projects, and in-depth case study of 4 BRT projects.	The magnitude of the impact tends to vary considerably with market dynamics, property types, and across different regions of the world. Despite the variations, several trends can be observed in the literature: 1) Proximity to BRT stations has a positive impact on land values, while proximity to a transit line (but not a station) occasionally showed a disamenity effect on residential properties; t…	4	weak +
35	Public transportation (bus rapid transit)	Economics: Land value	Carrigan, A, King, R, Velasquez, JM, Raifman, M, & Duduta, N. (2013). Social, Environmental and Economic Impacts of BRT Systems: Bus Rapid Transit Case Studies from Around the World. Washington, DC: EMBARQ.	http://www.embarq.org/sites/default/files/Social-Environmental-Economic-Impacts-BRT-Bus-Rapid-Transit-EMBARQ.pdf	15 international BRT projects, with in-depth case studies in Bogota, Colombia, Mexico City, Mexico, Johannesburg, South Africa, and Istanbul, Turkey.	Literature review, cost-benefit analysis and modeling of BRT projects, and in-depth case study of 4 BRT projects.	Two studies tracking the impact of BRT on property values over time in Beijing and Bogota show an increase in property values in the vicinity of stations in the range of 1.8 to 2.3 percent.	4	+
36	Public transportation (bus rapid transit)	Economics: Land value	Carrigan, A, King, R, Velasquez, JM, Raifman, M, & Duduta, N. (2013). Social, Environmental and Economic Impacts of BRT Systems: Bus Rapid Transit Case Studies from Around the World. Washington, DC: EMBARQ.	http://www.embarq.org/sites/default/files/Social-Environmental-Economic-Impacts-BRT-Bus-Rapid-Transit-EMBARQ.pdf	15 international BRT projects, with in-depth case studies in Bogota, Colombia, Mexico City, Mexico, Johannesburg, South Africa, and Istanbul, Turkey.	Literature review, cost-benefit analysis and modeling of BRT projects, and in-depth case study of 4 BRT projects.	In Seoul, Korea, research found that new BRT services produced highly localized land value premiums. Land markets capitalized the BRT’s accessibility benefits particularly for higher-density residential uses. Residences within 300 meters of the BRT stations experienced land price premiums of 5 to 10 percent, while retail and other non-residential uses within 150 m of the BRT stations benefitted f…	4	+
37	Ciclovia & play streets	Social benefits (social cohesion)	Hipp, JA, Eyler, AA, & Kuhlberg, JA. (2013). Target Population Involvement in Urban Ciclovias: A Preliminary Evaluation of St. Louis Open Streets. Journal of Urban Health, 90(6), 1010-1015.	http://link.springer.com/article/10.1007%2Fs11524-012-9759-6	Adults participating in two ciclovia events in St. Louis, MO during 2010.	Cross-sectional study using observation data (for 1452 participants) and participant survey data (82 adult interviewed).	89% of participants said the event changed their feelings for the city in a positive way and 74% felt the city was more vibrant during the event. The majority strongly agreed/agreed (88.1%) that Open Streets strengthens the local community.	3.5	+
38	Safe routes to school	Injury prevention	Pollack, KM, Keercher, C, Frattaroli, S, Peek-Asa, C, Sleet, D, & Rivara, FP. (2012). Toward Environments and Policies that Promote Injury-free Active Living- It Wouldn't Hurt. Health & Place, 18, 106-114.	http://www.sciencedirect.com/science/article/pii/S1353829211001262	Youth. United States.	Non-systematic literature review (number of studies not provided) on unintentional injuries associated with physical activity for youth.	While there is evidence to suggest that Safe Routes to School programs effectively increase the number of children who walk to school, there are limited data as to whether these programs have increased active transport while also minimizing injury risk. Anecdotally, SR2S initiatives have reduced pedestrian injury risk, and empirical evidence is on the horizon as studies to measure these risks are…	4	0
39	Pedestrian/bicycle infrastructure (bike lanes)	Injury prevention	Pollack, KM, Keercher, C, Frattaroli, S, Peek-Asa, C, Sleet, D, & Rivara, FP. (2012). Toward Environments and Policies that Promote Injury-free Active Living- It Wouldn't Hurt. Health & Place, 18, 106-114.	http://www.sciencedirect.com/science/article/pii/S1353829211001262	Youth. United States.	Non-systematic literature review (number of studies not provided) on unintentional injuries associated with physical activity for youth.	There are consistent data (two review studies) showing that marked bike lanes on roads reduce motor vehicle–bicycle collisions by as much as 50%.	4	+
40	Pedestrian/bicycle infrastructure (separated bike path)	Injury prevention	Pollack, KM, Keercher, C, Frattaroli, S, Peek-Asa, C, Sleet, D, & Rivara, FP. (2012). Toward Environments and Policies that Promote Injury-free Active Living- It Wouldn't Hurt. Health & Place, 18, 106-114.	http://www.sciencedirect.com/science/article/pii/S1353829211001262	Youth. United States.	Non-systematic literature review (number of studies not provided) on unintentional injuries associated with physical activity for youth.	There are conflicting data on the effect of separate bicycle paths, with some studies (n=2) finding a reduced risk of injuries, while others (n=2) report an increased risk of injuries for travel on these paths. The increased risk of injuries for travel on paths was hypothesized as resulting from the lack of established set of operating procedures (i.e., rules of the road) that exist on roadways.	4	0
41	Pedestrian/bicycle infrastructure (separated bike path)	Injury prevention	Lusk, AC, Morency, P, Miranda-Moreno, LF, Willett, WC, & Dennerlein, JT. (2013). Bicycle Guidelines and Crash Rates on Cycle Tracks in the United States. American Journal of Public Health, 103(7), 1240-1248.	http://ajph.aphapublications.org/doi/pdf/10.2105/AJPH.2012.301043	55 bicycle-vehicle crashes along 19 separated bike paths (located in California, Florida, Minnesota, Colorado, Massachusetts, Vermont, Oregon and New York)	Cross-sectional analysis of bicycle-vehicle crashes between 2009-2012	For the 19 paths, the overall crash rate was 2.3 (95% conﬁdence interval = 1.7, 3.0) per 1 million bicycle kilometers, which is low relative to reported crash rates on roadways in the United States and Canada (published crash rates per million bicycle kilometers range from 3.7536 to 5483 in the United States and from 4685 to 6786 in Canada.)	3.5	+
42	Public transportation	Economic benefits: Economic performance of cities	Cambridge Systematics, Inc. & Economic Development Research Group. (1999). Public Transportation and the Nation's Economy: A Quantitative Analysis of Public Transportation's Economic Impact. Washington, DC: American Public Transit Association.	http://www.apta.com/resources/reportsandpublications/Documents/vary.pdf	Capital and operating investments in United States	Cost-benefit analysis and simulation modeling of transit impacts aggregated to the national level from 1998 - 2017	It is estimated that every $10 million in capital investment in public transportation yields $30 million in increased business sales, and that every $10 million in operating investment in public transportation yields $32 million in increased business sales. For every $10 million invested, over $15 million is saved in transportation costs to both highway and transit users. These costs include oper…	2	+
43	Public transportation	Environmental benefits	Shapiro, RJ, Hassett, KA, & Arnold, FS. (2002). Conserving Energy and Preserving the Environment: The Role of Public Transportation. Washington, DC: American Public Transportation Association.	http://www.gobrt.org/aptaenergyreport.pdf	Public transportation service/use in 1998 in United States	Estimation of public transportation energy usage and pollution	Public transportation produces 95% less carbon monoxide (CO), 90% less in volatile organic compounds (VOCs), and about half as much carbon dioxide (CO2) and nitrogen oxide (NOx), per passenger mile, as private vehicles.	2	+
44	Public transportation	Environmental benefits	Bailey, L. (2007). Public Transportation and Petroleum Savings in the U.S.: Reducing Dependence on Oil. Fairfax, VA: ICF International.	http://www.apta.com/resources/reportsandpublications/Documents/apta_public_transportation_fuel_savings_final_010807.pdf	Public transportation service/use in 2004 in United States	Cross-sectional analysis of public transportation use and modeling of an expansion (doubling) of service and use	Public transportation usage reduces U.S. gasoline consumption by 1.4 billion gallons each year. In concrete terms, that means: 108 million fewer cars filling up – almost 300,000 every day; 34 fewer supertankers leaving the Middle East – one every 11 days; Over 140,000 fewer tanker truck deliveries to service stations per year; A savings of 3.9 million gallons of gasoline per day. If public transp…	2	+
45	Crosswalk markings	Injury prevention	Zegeer, CV, Steward, R, Huang, HH, Lagerwey, PA, Feaganes, J, & Campbell, BJ. (2005). Safety Effects of Marked Versus Unmarked Crosswalks at Uncontrolled Locations: Final Report and Recommended Guideline. McLean, VA: US Department of Transportation, Federal Highway Administration.	http://www.fhwa.dot.gov/publications/research/safety/04100/04100.pdf	5 years of pedestrian crashes at 1,000 marked crosswalk sites and 1,000 matched unmarked (comparison) crossing sites in 30 cities in United States	Quasi-experimental, matched pair design.	On two-lane roads, there were no significant differences in pedestrian crashes for marked and unmarked crosswalk sites. In other words, pedestrian safety on two-lane roads was not found to be different, whether the crosswalk was marked or unmarked. On multilane roads with ADT of 12,000 or less, there were also no differences in pedestrian crash rates between marked and unmarked sites.	3	0
46	Crosswalk markings	Injury prevention	Zegeer, CV, Steward, R, Huang, HH, Lagerwey, PA, Feaganes, J, & Campbell, BJ. (2005). Safety Effects of Marked Versus Unmarked Crosswalks at Uncontrolled Locations: Final Report and Recommended Guideline. McLean, VA: US Department of Transportation, Federal Highway Administration.	http://www.fhwa.dot.gov/publications/research/safety/04100/04100.pdf	5 years of pedestrian crashes at 1,000 marked crosswalk sites and 1,000 matched unmarked (comparison) crossing sites in 30 cities in United States	Quasi-experimental, matched pair design.	On two-lane roads, there were no significant differences in pedestrian crashes for marked and unmarked crosswalk sites. In other words, pedestrian safety on two-lane roads was not found to be different, whether the crosswalk was marked or unmarked. Further, on multilane roads with traffic volumes above about 12,000 vehicles per day, having a marked crosswalk alone (without other substantial impro…	3	0
47	Traffic calming (speed cushions, marked crossings, parking bays)	Physical health	Morrison, DS, Thomson, H, & Petticrew, M. (2004). Evaluation of the Health Effects of a Neighborhood Traffic Calming Scheme. Journal of Epidemiology & Community Health, 58, 837-840.	http://www.ncbi.nlm.nih.gov/pmc/articles/PMC1763332/pdf/v058p00837.pdf	185 households in Glasgow, Scotland	Prospective cohort (six months before and after traffic calming); with questionnaire.	A rise in physical component summary (PCS) scores between the first and second surveys that constituted a statistically significant improvement in physical health status.	3.5	+
48	Traffic calming (speed cushions, marked crossings, parking bays)	Mental health	Morrison, DS, Thomson, H, & Petticrew, M. (2004). Evaluation of the Health Effects of a Neighborhood Traffic Calming Scheme. Journal of Epidemiology & Community Health, 58, 837-840.	http://www.ncbi.nlm.nih.gov/pmc/articles/PMC1763332/pdf/v058p00837.pdf	185 households in Glasgow, Scotland	Prospective cohort (six months before and after traffic calming); with questionnaire.	Mental component summary scores (MCS) fell slightly in men and improved slightly in women between the first and second surveys, but neither change was statistically significant.	3.5	0
49	Traffic calming	Social benefits	Litman, T. (1999). Traffic Calming: Benefits, Costs and Equity Impacts. Victoria, BC: Victoria Transport Policy Institute.	http://www.vtpi.org/calming.pdf	All ages. United States.	Non-systematic review of studies/reports of traffic calming impacts	One study found that traffic calming helps make public streets lively and friendly, encourages community interaction, and attracts customers to commercial areas.	2	+
50	Traffic speed/volume	Social benefits	Litman, T. (1999). Traffic Calming: Benefits, Costs and Equity Impacts. Victoria, BC: Victoria Transport Policy Institute.	http://www.vtpi.org/calming.pdf	All ages. United States.	Non-systematic review of studies/reports of traffic calming impacts	One study found that as traffic increased on a street, residents tended to have fewer friends and acquaintances among their neighbors, and the area they consider “home territory” declined.	2	+
51	Pedestrian/bicycle infrastructure (bike share programs)	Injury prevention	Rojas-Rueda, D, de Nazelle, A, Tainio, M, & Nieuwenhuijsen, MJ. (2011). The Health Risks and Benefits of Cycling in Urban Environments Compared with Car Use: Health Impact Assessment Study. British Medical Journal, 343: d4521.	http://www.bmj.com/content/343/bmj.d4521	181,982 adult subscribers to public bicycle share program, Bicing, in Barcelona, Spain	Health impact assessment study using trip surveys, and public data on injury and environmental outcomes	Compared with car users the estimated annual change in mortality of the Barcelona residents using Bicing was 0.03 deaths from road traffic incidents and 0.13 deaths from air pollution.	3.5	+
52	Pedestrian/bicycle infrastructure (bike share programs)	Injury prevention	Rojas-Rueda, D, de Nazelle, A, Tainio, M, & Nieuwenhuijsen, MJ. (2011). The Health Risks and Benefits of Cycling in Urban Environments Compared with Car Use: Health Impact Assessment Study. British Medical Journal, 343: d4521.	http://www.bmj.com/content/343/bmj.d4521	181,982 adult subscribers to public bicycle share program, Bicing, in Barcelona, Spain	Health impact assessment study using trip surveys, and public data on injury and environmental outcomes	As a result of journeys by Bicing, annual carbon dioxide emissions were reduced by an estimated 9 062 344 kg.	3.5	+
53	Pedestrian/bicycle infrastructure (Bike parking vs auto parking)	Economic benefits (Economic performance of cities)	Lee, A. (2008). What is the Economic Contribution of Cyclists Compared to Car Drivers in Inner Suburban Melbourne's Shopping Strips? Melbourne, Australia: University of Melbourne.	http://colabradio.mit.edu/wp-content/uploads/2010/12/Final_Thesis_Alison_Lee.pdf	1,020 adult shoppers along Lygon Street, Melbourne, Australia	Quasi-experimental design using visitor travel survey, GIS public space audit, and group interviews	On-street auto parking averages $0.19 retail revenue per hour per square foot compared to $0.69 retail revenue per hour per square foot of bike parking.	3	+
54	Pedestrian/bicycle infrastructure (Bike trail)	Economic benefits (Land value)	Krizek, KJ. (2006). Two Approaches to Valuing Some of Bicycle Facilities' Presumed Benefits. Journal of the American Planning Association, 72(3), 309-320.	http://trid.trb.org/view.aspx?id=790137	181 adult suburban employees of the University of Minnesota	Quasi-experimental design using stated-preference survey, home sale data and GIS	For every quarter mile nearer to an off-street bicycle trail, the median home value increases by $510 in Minneapolis-St. Paul, MN.	3.5	+
55	Pedestrian/bicycle infrastructure (Biking vs auto use)	Economic benefits (Economic performance of cities)	Clifton, KJ, Morrissey, S, & Ritter, C. (2012). Exploring the Relationship between Consumer Behavior and Mode Choice. TR News, 280, 29.	http://kellyjclifton.com/Research/EconImpactsofBicycling/TRN_280_CliftonMorrissey&Ritter_pp26-32.pdf	Adults. Portland, OR	Cross-sectional analysis using intercept surveys	In Portland, OR, people who traveled to a shopping area by bike spent 24% more per month than those who traveled by car ($75.66 vs. $61.03 per month, respectively).	3	+
56	Traffic calming	Environmental benefits	Daham, B, Andrews, GE, Li, H, Partridge, M, Bell, MC, & Tate, J. (2005). Quantifying the Effects of Traffic Calming on Emissions Using On-road Measurements. Warrendale, PA: SAE International.	http://eprints.whiterose.ac.uk/2050/1/2005-01-1620SOrion_peedbump.pdf	Automobile emission testings in United Kingdom	Quasi-experimental design testing on-road emissions	When traffic-calmed results were compared to a smooth non-calmed road, there were substantial increases in CO2 (90%), CO (117%), NOx (195%) and THC (148%). These results form the basis for a good argument against traffic calming using speed bumps, especially for aggressive drivers. Slowing traffic down with speed restrictions enforced by speed cameras is a more environmentally friendly option.	3	-
57	Safe routes to school	Environmental benefits	Staunton C, Hubsmith D, and Kallins W. (2003). Promoting Safe Walking and Biking to School: The Marin County Success Story. American Journal of Public Health, 93(9), 1431-1434.	http://www.ncbi.nlm.nih.gov/pmc/articles/PMC1447987/	Elementary and middles schools in Marin County, a middle- and upper-class community on the California coast just north of San Francisco	Quasi-experimental: surveys before and after implementation of safe route to school program	An SRTS program in Marin County, Calif. showed a 64 percent increase in the number of young people who walked to school after the first two years. After the fourth year, the Marin County program calculated that the percentage of children arriving and leaving school in a family car dropped from 55 percent to 42 percent, or 4,250 fewer car trips per day. This represents an annual reduction of rough…	3.5	+
58	Pedestrian/bicycle infrastructure; Traffic speed/volume; Safe routes to school; Traffic calming (road space reallocation)	Social benefits	Sinnett, D, Williams, K, Chaterjee, K, & Cavill, N. (2011). Making the Case for Investment in the Walking Environment. A Review of the Evidence. London: Living Streets.	http://www.livingstreets.org.uk/sites/default/files/file_attach/Making%20the%20case%20full%20report%20(web).pdf	All ages, international	Literature review (non systematic)	Walking, and walking friendly environments, are associated with a number of social benefits, including increased social interaction, the development of social capital and increased safety. walking friendly neighbourhoods are associated with greater levels of social interaction, sense of community social capital and place attachment. Specific aspects of the walking environment have also been found…	3	+
59	Pedestrian/bicycle infrastructure; Traffic speed/volume; Traffic calming (road space reallocation)	Environmental benefits	Sinnett, D, Williams, K, Chaterjee, K, & Cavill, N. (2011). Making the Case for Investment in the Walking Environment. A Review of the Evidence. London: Living Streets.	http://www.livingstreets.org.uk/sites/default/files/file_attach/Making%20the%20case%20full%20report%20(web).pdf	All ages, international	Literature review (non systematic)	Environmental benefits from walking investments, in terms of air quality, carbon dioxide emissions and noise reductions, are related primarily to shifts from motorised transport.	3	+
60	Pedestrian/bicycle infrastructure; Traffic speed/volume; Traffic calming (road space reallocation)	Economic benefits (land value, real estate profitability)	Sinnett, D, Williams, K, Chaterjee, K, & Cavill, N. (2011). Making the Case for Investment in the Walking Environment. A Review of the Evidence. London: Living Streets.	http://www.livingstreets.org.uk/sites/default/files/file_attach/Making%20the%20case%20full%20report%20(web).pdf	All ages, international	Literature review (non systematic)	Improvements to the walking environment have the potential to increase economic value and economic activity in the local area, and this can be reflected by the sale price of residential property and the rental price of retail premises.	3	+
61	Pedestrian/bicycle infrastructure (street design)	Social benefits	Department for Transport, & Department for Communities and Local Government. (2007). Manual for Streets. London: Thomas Telford Publishing.	https://www.gov.uk/government/uploads/system/uploads/attachment_data/file/3891/pdfmanforstreets.pdf	All ages. European region	Review and expert consensus	Attractive and well-connected permeable street networks encourage more people to walk and cycle to local destinations, improving their health while reducing motor traffic, energy use and pollution; more people on the streets leads to improved personal security and road safety - research shows that the presence of pedestrians on streets causes drivers to travel more slowly; people meeting one anot…	4	+
62	Public transportation	Economic (economic performance of cities, job creation)	Wu, D. (2013). Jobs in Green and Healthy Transport: Strengthening the Economic Case for Environment Friendly and Health Promoting Transport Policy. Oxford: Nuffield Department of Population Health. University of Oxford.		All ages. European region	Scoping Study to identify studies with quantifiable impact on job creation in green and healthy transport, Targeted Lit Search complemented by case studies	Substantial job creation impact was found in the areas of public transport, active travel (walking and cycling) and tourism, largely because the sustainable transport sector is more labour-intensive and better shielded against investment leakages. This suggests that a stronger economic case can be made for sustainable transport.	2	+
63	Traffic speed/volume	Social benefits	Litman, TA. (2011). Economic Value of Walkability. Victoria, B.C.: Victoria Transport Policy Institute.	http://www.vtpi.org/walkability.pdf	All ages, international	Review of categories of economic benefits, how they can be measured, and how they are reflected in transportation and land use planning	Walkability has major impacts on community livability. Streets are a major portion of the public realm, that is, places where people interact with their community. More attractive, safe and walkable streets increase community livability (Forkenbrock and Weisbrod 2001). Residents on streets with higher traffic volumes and speeds are less likely to know their neighbors, and show less concern for th…	2	+
64	Pedestrian/bicycle infrastructure (cycling project)	Mental health (well-being)	Troelsen, J, Jensen, SU, & Andersen, T. (n.d.). Evaluering af Odense – Danmarks Nationale Cykelby. Odense: Odense Kommune.	http://www.odense.dk/web4/cyklisternesby/inspiration%20fra%20cykelbyen/maal%20og%20resultater/~/media/SUBSITES%20OG%20WEBLIGHT/Cykelby/Idekatalog/Evaluering%20Danmarks%20Nationale%20Cykelby.ashx	adults, Denmark	Evaluation of cycling city project over three years	The citizens of Odense were to consciously feel an improvements in well-being,	3	+
65	Pedestrian/bicycle infrastructure (cycling project)	Injury prevention	Troelsen, J, Jensen, SU, & Andersen, T. (n.d.). Evaluering af Odense – Danmarks Nationale Cykelby. Odense: Odense Kommune.	http://www.odense.dk/web4/cyklisternesby/inspiration%20fra%20cykelbyen/maal%20og%20resultater/~/media/SUBSITES%20OG%20WEBLIGHT/Cykelby/Idekatalog/Evaluering%20Danmarks%20Nationale%20Cykelby.ashx	adults, Denmark	Evaluation of cycling city project over three years	"The number of cyclists killed or injured in accidents involving more than one party was to be reduced by 20 per cent in the same period" (1999-2002)	3	+
66	Pedestrian/bicycle infrastructure (bicycling)	Environmental benefits	Blondel, B., Mispelon, C, & Ferguson, J. (2011). Cycle More Often to Cool Down the Planet: Quantifying CO2 Savings of Cycling. European Cyclists Federation (2011). Belgium: European Cyclists' Federation.	http://www.ecf.com/wp-content/uploads/ECF_CO2_WEB.pdf	All ages. European region	Uses current levels of cycling as a basis to estimate the green house gas emissions of the bicycle and its use compared against other modes of transport	Between 1990 and 2007 greenhouse gas emissions from transport increased by 36% in the EU. By 2050 the EU has set a target to reduce green house gas emissions by 80-95% (60% will need to come from transport sector). Emissions from bicycles are 10 times less than those from moterised vehicles. If levels of cycling in EU were equivalent to those of Denmark, bike use would help achieve 12-26% of the …	4	+
67	Pedestrian/bicycle infrastructure (cycle tourism)	Economic (economic performance of cities)	Institute of Transport and Tourism & Centre for Sustainable Transport and Tourism. (2009). The European Cycle Route Network Eurovelo: Challenges and Opportunities for Sustainable Tourism. Brussels: European Parliament.	http://ec.europa.eu/enterprise/sectors/tourism/iron-curtain-trail/files/ep_studyeurovelo_en.pdf	All ages. European region	Review of evidence and findings on the scale and scope of cycle tourism in Europe, the extent to which EuroVelo can be developed as a sustainable tourism network	Cycle tourism supports EU policy however there are a number of barriers including a lack of interface between transport modes and a lack of presence of cycle tourism in the market and poor quality cycle routes and networks. Evidence within this study indicates that cycle tourists bring major benefits to localities which do not have mainstream tourism. Train and cycle package are most important co…	2	+
68	Traffic speed/volume	Injury prevention	National Institute for Health and Care Excellence. (2010). Preventing Unintentional Road Injuries among Under-15s (Public Health Guidance 31). London: National Institute for Health and Care Excellence.	http://guidance.nice.org.uk/PH31	All ages, international	Review of evidence, cost effectiveness modelling, expert advice, stakeholder comments and fieldwork	Road design has a key influence on speed, excess and inappropriate speed contributes to around 30% of fatal crashes in high income countries. Vulnerable road users are at particular risk. Pedestrians have a 90% chance of surviving a car crash at speeds below 30 kph. There is increased risk of death or serious injury between the ages of 10 - 11 years, with boys at greater risk than girls (65% of t…	4	+
69	Public transportation (transit access)	Environmental benefits (green house gas emissions)	Barla, P, Miranda-Moreno, LF, & Lee-Gosselin, M. (2011). Urban Travel CO2 Emissions and Land Use: A Case Study for Quebec City. Transportation Research Part D: Transport and Environment, 16(6):423-428.	http://www.sciencedirect.com/science/article/pii/S1361920911000447	400 respondents from 250 households (15000 trips) from a longitudinal travel survey. Quebec City, Canada.	Estimated models DV=daily GHG emissions produced by individuals; IV=sociodemographic and environmental characteristics	Adjusted for other characteristics, a significant and positive association between not having access to transit within 2km from home and GHG emission (Elasticity = 0.13)	3.5	+
70	Public transportation (transit access)	Environmental benefits (CO2 emission (estimated in 4 ways))	Hong, J & Goodchild, A. (2014). Land Use Policies and Transport Emissions: Modeling the Impact of Trip Speed, Vehicle Characteristics and Residential Location. Transportation Research Part D: Transport and Environment, 26: 47-51.	http://www.sciencedirect.com/science/article/pii/S1361920913001363	4746 households living in the Puget Sound Region. Pierce County, WA, USA.	Household Activity Survey, multi-level modeling adjusted for clustering, household size, income, # workers and # vehicles	Transit accessibility (measured by the distance to the nearest bus stop was not associated with CO2 emissions in Urban areas (b: 0.078-0.096)	3.5	0
71	Public transportation (transit access)	Environmental benefits (CO2 emission (estimated in 4 ways))	Hong, J & Goodchild, A. (2014). Land Use Policies and Transport Emissions: Modeling the Impact of Trip Speed, Vehicle Characteristics and Residential Location. Transportation Research Part D: Transport and Environment, 26: 47-51.	http://www.sciencedirect.com/science/article/pii/S1361920913001363	4746 households living in the Puget Sound Region. Pierce County, WA, USA.	Household Activity Survey, multi-level modeling adjusted for clustering, household size, income, # workers and # vehicles	Transit accessibility (measured by the distance to the nearest bus stop was positively associated (as expected)with CO2 emissions in suburban areas (b: 0.069-0.076)	3.5	+
72	Public transportation (commuter rail service)	Environmental benefits (green house gas emissions)	Deka, D & Marchwinski, T. (2014). The Revenue and Environmental Benefits of New Off-peak Commuter Rail Service: The Case of the Pascack Valley Line in New Jersey. Transportation, 41(1): 157-172.	http://link.springer.com/article/10.1007%2Fs11116-013-9495-0	1431 passengers who completed onboard survey (46% female, 75% White, 44% 25-44yr). New Jersey, USA	Two focus groups, one onboard survey. Benefits were estimated regarding additional revenue and reduction in VMT and GHG emission	The net GHG savings from the new trains appear to be in the 28%-49% range.	3.5	+
73	Public transportation (Bus rapid transport)	Environmental benefits (CO2 emission)	Guo, J, Liu, H, Jiang, Y, He, D, Wang, Q, Meng, F, & He, K. (2014). Neighborhood Form and CO2 Emission: Evidence from 23 Neighborhoods in Jinan, China. Frontiers of Environmental Science and Technology,8(1), 79-88.	http://link.springer.com/article/10.1007%2Fs11783-013-0516-1	4169 households from 23 neighborhoods, Respondents aged 20 to 65. Jinnan, China.	In-home and transportation energy consumption and CO2 emissions were modeled with using univariate regression models (For models with environmental IVs neighborhood was the analytical unit)	Having bus rapid transit nearby cut CO2 emissions by 13%	3.5	+
74	Other (policy): Imposing user charge of street	Environmental benefits (CO2 emission)	Hensher, DA. (2008). Climate Change, Enhanced Greenhouse Gas Emissions and Passenger Transport - What Can We Do to Make a Difference? Transportation Research Part D: Transport and Environment,13: 95-111.	http://www.sciencedirect.com/science/article/pii/S1361920907001320	Sydney, Australia	Simulation---using TRESIS (Transportation and Environment Strategy Simulator) to evaluate impact of different transportation policies on CO2 emission	Imposing a 10c/km variable user charge on the main road network 7am-6pm for all days of the week was predicted to result in a 4.74% reduction of CO2 from passenger cars in 2015 (based on 2010 data).	3.5	+
75	Other (policy): Carbon tax	Environmental benefits (CO2 emission)	Hensher, DA. (2008). Climate Change, Enhanced Greenhouse Gas Emissions and Passenger Transport - What Can We Do to Make a Difference? Transportation Research Part D: Transport and Environment,13: 95-111.	http://www.sciencedirect.com/science/article/pii/S1361920907001320	Sydney, Australia	Simulation---using TRESIS (Transportation and Environment Strategy Simulator) to evaluate impact of different transportation policies on CO2 emission	Imposing a 40c/kg carbon tax was predicted to result in a 4.95% reduction of CO2 from passenger cars in 2015 (based on2010 data).	3.5	+
76	Public transportation (frequency of bus service)	Environmental benefits (CO2 emission)	Hensher, DA. (2008). Climate Change, Enhanced Greenhouse Gas Emissions and Passenger Transport - What Can We Do to Make a Difference? Transportation Research Part D: Transport and Environment,13: 95-111.	http://www.sciencedirect.com/science/article/pii/S1361920907001320	Sydney, Australia	Simulation---using TRESIS (Transportation and Environment Strategy Simulator) to evaluate impact of different transportation policies on CO2 emission	Doubling bus frequency did little to reduce CO2 (0.16% reduction in 2015)	3.5	0
77	Public transportation (rail/bus fares)	Environmental benefits (CO2 emission)	Hensher, DA. (2008). Climate Change, Enhanced Greenhouse Gas Emissions and Passenger Transport - What Can We Do to Make a Difference? Transportation Research Part D: Transport and Environment,13: 95-111.	http://www.sciencedirect.com/science/article/pii/S1361920907001320	Sydney, Australia	Simulation---using TRESIS (Transportation and Environment Strategy Simulator) to evaluate impact of different transportation policies on CO2 emission	Reducing rail and bus fares by 50% did little to reduce CO2 (0.42% reduction in 2015)	3.5	0
78	Other (policy): Fuel tax	Environmental benefits (CO2 abated and Cost per metric ton GHG abated)	Silva-Send, N, Anders, S, & Narwold, A. (2013). Cost Effectiveness Comparison of Certain Transportation Measures to Mitigate Greenhouse Gas Emissions in San Diego County, California. Energy Policy, 62: 1428-1433.	http://ideas.repec.org/a/eee/enepol/v62y2013icp1428-1433.html	San Diego, CA	GHG and cost-effectiveness analyses of different actual transportation policies. Projection of 2010.	Fuel tax will lead to 0.3 million metric ton GHG abated by 2020 and the cost per metric ton GHG abated was zero	3.5	+
79	Managed parking (parking fee policy)	Environmental benefits (CO2 abated and Cost per metric ton GHG abated)	Silva-Send, N, Anders, S, & Narwold, A. (2013). Cost Effectiveness Comparison of Certain Transportation Measures to Mitigate Greenhouse Gas Emissions in San Diego County, California. Energy Policy, 62: 1428-1433.	http://ideas.repec.org/a/eee/enepol/v62y2013icp1428-1433.html	San Diego, CA	GHG and cost-effectiveness analyses of different actual transportation policies. Projection of 2010.	Parking fee policies will lead to 0.35 million metric ton GHG abated by 2020 and the cost per metric ton GHG abated was low ($98)	3.5	+
80	Public transportation (mass transit development policy)	Environmental benefits (CO2 abated and Cost per metric ton GHG abated)	Silva-Send, N, Anders, S, & Narwold, A. (2013). Cost Effectiveness Comparison of Certain Transportation Measures to Mitigate Greenhouse Gas Emissions in San Diego County, California. Energy Policy, 62: 1428-1433.	http://ideas.repec.org/a/eee/enepol/v62y2013icp1428-1433.html	San Diego, CA	GHG and cost-effectiveness analyses of different actual transportation policies. Projection of 2010.	Mass transit policies will lead to nearly 0.30 million metric ton GHG abated by 2020 and the cost per metric ton GHG abated was high ($2607) when health was not factored in, but negative when health was considered in the analysis ($-74)	3.5	+
81	Pedestrian/bicycle infrastructure (bicycle promoting policies)	Environmental benefits (CO2 abated and Cost per metric ton GHG abated)	Silva-Send, N, Anders, S, & Narwold, A. (2013). Cost Effectiveness Comparison of Certain Transportation Measures to Mitigate Greenhouse Gas Emissions in San Diego County, California. Energy Policy, 62: 1428-1433.	http://ideas.repec.org/a/eee/enepol/v62y2013icp1428-1433.html	San Diego, CA	GHG and cost-effectiveness analyses of different actual transportation policies. Projection of 2010.	Bicycle strategy will lead to nearly 0.02 million metric ton GHG abated by 2020 and the cost per metric ton GHG abated was high ($37811)---mainly due to low participation rate	3.5	0
82	Managed parking (off-street parking)	Environmental benefits (CO2 emission)	Weinberger, R, Seaman, M, & Johnson, C. (2009). Residential Off-street Parking Impacts on Car Ownership, Vehicle Miles Traveled, and Related Carbon Emissions: New York City Case Study. Journal of the Transportation Research Board, 2118, 24-30.	http://trid.trb.org/view.aspx?id=881945	NY Metropolitan Transportation Council Regional Travel Household Survey and National Household Travel Survey--NY supplement (sample characteristics not reported). New York City, USA	Testing of 4 potential developmental scenarios and projected CO2 emission by 2030	The combination of extreme high density and fewer off-street parking will lead to the lowest CO2 emission	3.5	+
83	Public transportation (transit access)	Environmental benefits (energy from motorized transport)	Frank, LD, Greenwald, MJ, Winkelman, S, Chapman, J, & Kavage, S. (2010). Carbonless Footprints: Promoting Health and Climate Stabilization Through Active Transportation. Preventive Medicine, 50: S99-S105.	http://www.sciencedirect.com/science/article/pii/S0091743509004873	Atlanta-based SMARTRAQ Travel Survey (n=10,148) Mean age 44.6 yr, 50% male, 72% white. Atlanta, GA	Cross-sectional analysis of travel diary data	Distance to the nearest rail station was not significantly associated energy consumed from motorized transport (b=0.01)	3.5	0
84	Public transportation (transit access)	Environmental benefits (energy from motorized transport)	Frank, LD, Greenwald, MJ, Winkelman, S, Chapman, J, & Kavage, S. (2010). Carbonless Footprints: Promoting Health and Climate Stabilization Through Active Transportation. Preventive Medicine, 50: S99-S105.	http://www.sciencedirect.com/science/article/pii/S0091743509004873	Atlanta-based SMARTRAQ Travel Survey (n=10,148) Mean age 44.6 yr, 50% male, 72% white. Atlanta, GA	Cross-sectional analysis of travel diary data	Distance to the nearest bus stop was not significantly associated energy consumed from motorized transport (b=0.01)	3.5	0
85	Public transportation (transit access)	Environmental benefits (energy from motorized transport)	Frank, LD, Greenwald, MJ, Winkelman, S, Chapman, J, & Kavage, S. (2010). Carbonless Footprints: Promoting Health and Climate Stabilization Through Active Transportation. Preventive Medicine, 50: S99-S105.	http://www.sciencedirect.com/science/article/pii/S0091743509004873	Atlanta-based SMARTRAQ Travel Survey (n=10,148) Mean age 44.6 yr, 50% male, 72% white. Atlanta, GA	Cross-sectional analysis of travel diary data	Having public transit access (yes vs no) to 5 major activity centers was significantly associated with less energy consumed from motorized transport (b=-0.15)	3.5	+
86	Managed parking	Environmental benfits (gasoline use)	Newman, PWG & Kenworthy, JR. (1989). Gasoline Consumption and Cities. Journal of the American Planning Association, 55: 24-37.	http://www.tandfonline.com/doi/abs/10.1080/01944368908975398#.UszqDdKSxvE	City-level data (n=32), sample characteristics N/A. 32 international cities.	Cross-sectional analysis of city-level data	Parking spaces (per CBD workers) was positively and significantly associated with gasoline consumption (r=0.692)	3.5	+
87	Other: Road supply	Environmental benfits (gasoline use)	Newman, PWG & Kenworthy, JR. (1989). Gasoline Consumption and Cities. Journal of the American Planning Association, 55: 24-37.	http://www.tandfonline.com/doi/abs/10.1080/01944368908975398#.UszqDdKSxvE	City-level data (n=32), sample characteristics N/A. 32 international cities.	Cross-sectional analysis of city-level data	Road supply (ft/capita) was positively and significantly associated with gasoline consumption (r=0.692)	3.5	+
88	Traffic speed/volume	Environmental benfits (gasoline use)	Newman, PWG & Kenworthy, JR. (1989). Gasoline Consumption and Cities. Journal of the American Planning Association, 55: 24-37.	http://www.tandfonline.com/doi/abs/10.1080/01944368908975398#.UszqDdKSxvE	City-level data (n=32), sample characteristics N/A. 32 international cities.	Cross-sectional analysis of city-level data	Traffic speed (MPH) was positively and significantly associated with gasoline consumption (r=0.692)	3.5	+
89	Public transportation; Traffic speed/volume	Environmental benefits (energy consumption)	Mindali, O, Raveh, A, & Salomon, I. (2004). Urban Density and Energy Consumption: A New Look at Old Statistics. Transportation Research Part A: Policy and Practice, 38: 143-162.	http://www.sciencedirect.com/science/article/pii/S0965856403000946	City-level data (n=32), sample characteristics N/A. 32 international cities.	Cross-sectional analysis of city-level data (re-analysis using innovative methods "Co-Plot" of data from Newman 1989	Average speed of public transportation was significantly and inversely associated with per capita energy use	3.5	+
90	Other: Total traffic area	Environmental benefits (CO2 emission)	Reckien, D, Ewald, M, Edenhofer, O, & Liideke, MKB. (2007). What Parameters Influence the Spatial Variations in CO2 Emissions from Road Traffic in Berlin? Implications for Urban Planning to Reduce Anthropogenic CO2 Emissions. Urban Studies, 44: 339-355.	http://usj.sagepub.com/content/44/2/339.refs	Department of Urban Development and traffic monitoring data at the district level (n=23), characteristics N/A. Berlin, Germany	Cross-sectional analysis based on existing data	A positive association between traffic area and CO2 emissions of the district	3.5	+
91	Other: Street length	Environmental benefits (CO2 emission)	Reckien, D, Ewald, M, Edenhofer, O, & Liideke, MKB. (2007). What Parameters Influence the Spatial Variations in CO2 Emissions from Road Traffic in Berlin? Implications for Urban Planning to Reduce Anthropogenic CO2 Emissions. Urban Studies, 44: 339-355.	http://usj.sagepub.com/content/44/2/339.refs	Department of Urban Development and traffic monitoring data at the district level (n=23), characteristics N/A. Berlin, Germany	Cross-sectional analysis based on existing data	A positive association between total street length and CO2 emissions of the district	3.5	+
92	Other: Length of highways	Environmental benefits (CO2 emission)	Reckien, D, Ewald, M, Edenhofer, O, & Liideke, MKB. (2007). What Parameters Influence the Spatial Variations in CO2 Emissions from Road Traffic in Berlin? Implications for Urban Planning to Reduce Anthropogenic CO2 Emissions. Urban Studies, 44: 339-355.	http://usj.sagepub.com/content/44/2/339.refs	Department of Urban Development and traffic monitoring data at the district level (n=23), characteristics N/A. Berlin, Germany	Cross-sectional analysis based on existing data	No significant association between length of highways and district-level CO2 emissions	3.5	0
93	Other: Coordinated transportation investment	Environmental benefits (VMT)	Bartholomew, K, & Ewing, R. (2009). Land Use-Transportation Scenarios and Future Vehicle Travel and Land Consumption: A Meta-Analysis. Journal of the American Planning Association, 75: 13-27.	http://faculty.arch.utah.edu/bartholomew/Individual%20Files/08_Scenario_JAPA.pdf	USA	Meta-analysis of scenario planning projects (85 scenarios in 23 planning studies)	Coordinated transportation investment did not predict change in VMT (coefficient=-2.12)	3.5	0

## Sheet: Schools
SCHOOLS
RESOURCE #	FEATURE	CO-BENEFIT	RESOURCE	LINK	SAMPLE CHARACTERISTICS	METHODS	FINDINGS	Grading the Evidence	Direction of Association
1	School siting	Environmental benefits; Social benefits; Economic benefits (Land value)	Kuhlman, R. (2010). Helping Johnny Walk to School: Policy Recommendations for Removing Barriers to Community-centered Schools. Washington, DC: National Trust for Historic Preservation.	http://www.preservationnation.org/information-center/saving-a-place/historic-schools/helping-johnny/helping-johnny-walk-to-school.pdf	Report, not a systematic review. United States	N/A	The presence of a local school supports higher property values. Community-centered schools save on construction and operating costs.	2	+
2	School siting	Economics (Land value; Government costs)	Michigan Land Use Institute. (2004). Hard Lessons: Causes and Consequences of Michigan’s School Construction Boom. Beulah, MI: Michigan Land Use Institute.	http://www.mlui.org/userfiles/filemanager/1761/	Public schools from 553 school districts in Michigan.	Non-systematic review, case studies, and qualitative research: they got information from the school districts regarding school development issues; over 120 interviews of school staff, board members, parents, students, and citizens. Review of school financing and construction documents.	School construction on undeveloped sites generates many new expenses for infrastructure and government services, which eventually raise taxes for business and property owners. Keeping an existing school open increases home values in surrounding neighborhoods and helps stabilize the area and its business activity, while closing them slows the rise of home values. Building new schools costs more th…	2	+
3	School Site	Economics	Chung, C. (2002). Using Public Schools as Community-development Tools: Strategies for Community-based Developers. Cambridge, MA: Joint Center for Housing Studies, Harvard University and Neighborhood Reinvestment Corporation, pp. 1-46.	http://www.nw.org/network/pubs/studies/documents/schoolsCommDevelop2002.pdf	Non systematic survey of reports, articles and over 20 in-person and telephone interviews. Number of articles reviewed not provided. United States.	Non-systematic review of literature	The adaptive reuse of buildings and infill development are cost-effective methods, and may also provide centrally located sites. In addition to the social costs of disconnecting children from their neighborhoods, public-school sprawl produces externalities such as pollution and extra costs for bus transportation. Community-based developers can use public schools as community-development tools to …	4	+
4	School site	Environmental benefits	Ewing, R., & Greene, W. (2003). Travel and Environmental Implications of School Siting. U.S. Environmental Protection Agency, EPA 231-R-03-004.	http://www.epa.gov/dced/pdf/school_travel.pdf	Two travel diary surveys of residents of Gainsville, FL. to identify all K–12 school trips. Survey 1 sampled 726 adults, and survey 2 sampled 3,089 adults. A total of 15,980 trips were reported, from which school trips were extracted and mode choices analyzed.	Cross sectional survey and simulation techniques used to estimate reduction in emissions for a scenario of neighborhood schools and walkable streets (as compared to actual Gainsville sample).	Comparing two high schools, one centrally located and surrounded by development and the other located at the edge of the urbanized area amidst undeveloped land: the school on the edge of town had twice the emissions as the centrally located school. This was due to longer commutes to the school, and a larger percentage of trips taken by car (100% by car, versus 85% by car for the centrally located…	4	+
5	School site	Environmental benefits	Marshall, J., Wilson, R., Meyer, K., Rajangam, S., McDonald, N., & Wilson, E. (2010). Vehicle Emissions During Children's School Commuting: Impacts of Education Policy. Environmental Science and Technology, 44, 1537-1543.	http://pubs.acs.org/doi/abs/10.1021/es902932n	Two samples of elementary-age children, age 5−12: a travel survey (n = 1246 respondents) and a school enrollment data set (n = 19,655 students). United States	Cross sectional survey and simulation techniques used to estimate reduction in emissions; Multinomial logistic regression modeled the determinants of travel mode (automobile, school bus, and walking; n = 803 students meeting selection criteria.	If students attended schools located in their neighborhood (i.e., eliminating school choice) average travel distance would reduce 4- to 5-fold. Walking rates increase 3- to 4-fold, and distance walked more than doubles. Automobile rates increase, but owing to shorter commutes, distance traveled by automobile is more than cut in half. Busing rate drops by more than half and busing distance decline…	2	+
6	School Site	Environmental and Health benefits	Chang-Chuan C., Shou-Hsiang L., & Guor-Rong H. (1993). Student’s Exposure to Volatile Organic Compounds While Commuting by Motorcycle and Bus in Taipei City, Air & Waste, 43(9), 1231-1238.	http://www.tandfonline.com/doi/pdf/10.1080/1073161X.1993.10467200	1694 students from five levels of school systems, i.e., elementary schools (n=270), junior high schools (n=258), high schools (n=738), vocational schools (n=308), and colleges (n=122) filled out a questionnaire regarding their commute to school. A total of 19 target G5-C10 volatile organic compounds (VOCs) were collected while commuting by bus and motorcycleon three most frequently used commuting…	Cross sectional study of student commute and air pollutants.	Tawainese elementary students had a median commute time of 45 minutes; vocational students had a median commute time of 95 minutes. For this analysis, 270 commuting days per year were assumed to calculate the lifetime health risk attributable to commuting. The results showed that upper-bound cancer risks of commuters ranged from 7.5 x 10-6 to 1.8 x 10-5 during their commutes. Conclusion: students…	3.5	+
7	School site	Injury prevention: crime/violence	Miller, A. (2003). Violence in U.S. Public Schools: 2000 School Survey on Crime and Safety-Statistical Analysis Report. NCES 2004–314 REVISED. U.S. Department of Education, National Center for Education Statistics. Washington, DC: U.S. Government Printing Office.	http://nces.ed.gov/pubs2004/2004314.pdf	National Center for Education Statistics (NCES) administered the 2000 School Survey on Crime and Safety (SSOCS), a survey of public schools in the United States.	Cross sectional. Survey asked school principals about the characteristics of school policies, school violence prevention programs and practices, violent deaths at school and elsewhere, frequency of crime and violence, disciplinary problems and actions, and other school characteristics that have been associated with school crime. SSOCS is a nationally representative sample of 2,270 regular public …	Based on logistic regressions which controlled for percent minority enrollment, percent free/reduced-price lunch, percent of students scoring below the 15th percentile, student/teacher ratio: City schools (77 percent) were more likely than urban fringe schools (67 percent) to report an occurrence of at least one violent incident during the 1999–2000 school year, while no differences were detected…	3	-
8	School Site	Economics	Bergsagel, V. (2006). Community Partnerships: Student Success and Community Vitality. School Planning & Mangagement, 15-16.		One highschool in Tacoma, WA.	Report - not a quantitative study	In Tacoma, WA, a performing arts school renovated two buildings located downtown for its primary location, and shares space at 8 other downtown facilities, including museums, theaters, and art centers, where their students take classes. The school's new theater is used during non-school hours for community dance performances, concerts, etc. Business owners credit the school with revitalizing the …	2	+
9	Recreation facilities	Economics	Cellini, S., Ferreira, F., & Rothstien, J. (2010). The Value of School Facility Investments: Evidence from a Dynamic Regression Discontinuity Design. The Quarterly Journal of Economics, 125 (1): 215-261.		All general obligation bond measures sponsored by school districts between 1987 and 2006, merged with annual district-level enrollment and ﬁnancial data from the Common Core of Data (CCD). They used a data service to obtain information on all housing transactions in California from 1988 to 2005.	Quasi-experimental with modeling: they compared effects of capital investments on housing prices by comparing districts in which school bond referenda passed or failed by narrow margins (reasoning that these districts would be somewhat similar to eachother).	(NOTE: this study analyzed bonds for all school facilities, not just recreational facilities). California districts at the margin of passing a school bond are spending below the economically efficient level because returns on additional spending (through increased property values and increased property taxes) will far exceed the cost of the school bond. In districts where school bond measures wer…	3.5	+
10	Recreation facilities	Mental Benefits	Lopez, R., Jennings, J., & Campbell, R. (2008). Schoolyard Improvements and Standardized Test Scores: An Ecological Analysis. Boston, MA: Maurico Gaston Institute.	http://scholarworks.umb.edu/cgi/viewcontent.cgi?article=1120&context=gaston_pubs	All Boston Public Schools that had published fourth grade test scores were included in the study (72/82). About 2/3 of the schools had renovated schoolyards.	Cross-sectional: Compared test scores of schools with renovated schoolyards versus schools w/o rennovated schoolyards. Doesn't appear that they measured whether students used playgrounds.	Controlling for the racial/ethnic composition of a school and the percent of students receiving reduced or free lunches, schools that had a renovated schoolyard had more of their students passed the state mandated math test (1.06, 95% confidence interval = .00012, .12). There were differences between renovated and non-renovated schools. A higher percentage of students in the renovated schools wer…	3	+
11	Recreation facilities	Physical health (obesity)	Dunton, G., Kaplan, J., Wolch, J., Jerrett, M., & Reynolds, K. (2008). Physical Environmental Correlates of Childhood Obesity: A Systematic Review. Obesity Reviews, 10, 393–402.	https://webfiles.uci.edu/psbstaff/1-25-10%20Colloquium-SE%20Perspectives%20on%20Psych%20Research/Dunton%20et%20al%20Obesity%20Reviews.pdf	United States	Literature review of 15 studies of correlates of childhood obesity; 85% of the studies examined were cross-sectional.	Obesity was negatively related to child-reported but not parent-reported access to physical activity facilities and availability of bicycle and walking trails. The number of locked schoolyards was positively related to obesity in children. BUT proximity to playgrounds, parks and play areas were unrelated to BMI in children.	4.5	0
12	Recreation facilities	Physical health (obesity)	Casey, R., Oppert, J., Weber, C., Charreire, H., Salze, P., Badariotti, D., Banos, A., Fischler, C., Hernandez, C., Chaix, B., & Simon, C. (2014). Determinants of Childhood Obesity: What Can We Learn from Built Environment Studies? Food Quality and Preference, 31, 164-172.	http://www.sciencedirect.com/science/article/pii/S0950329311000991	United States	Literature review of 25 papers (9 related to child's weight).	Weight of youth is inversely to the spatial accessibility to recreational physical activity facilities (4 out of 9 papers).	4.5	+
13	Recreation facilities	Physical & Mental Health (motor skills?)	Fjortoft, I. (2004). Landscape as Playscape: The Effects of Natural Environments on Children's Play and Motor Development. Children, Youth and the Environment, 14(2), 21-44, 2004.	http://www.stichtingoase.nl/literatuur/doc/doc_76.pdf	Children aged 5-7 (Kindergarten) in Norway	A quasi-experimental study. Experimental group played in a natural environment and a control group played in a more traditional playground. Methods from landscape ecology were applied for landscape analysis and entered into a Geographic Information System (GIS). Localization of play habitats was done by use of Global Positioning Systems (GPS).	When provided with a natural landscape in which to play, children showed a statistically significant increase in motor fitness. There were also significant differences between the two groups in balance and co-ordination in favor of the experimental group. The findings indicate that landscape features influence physical activity play and motor development in children.	3.5	+
14	Recreation facilities	Mental & Social benefits	Bundy A., Luckett T., Naughton G., Tranter P., Wyver S., Ragen J., Singleton E., & Spies G. (2008). Playful Interaction: Occupational Therapy for All Children on the School Playground. American Journal of Occupational Therapy, 62(5), 522-7.	http://kinderergotherapieinbeweging.nl/onewebmedia/522.full.pdf	Pilot study of twenty 5- to 7-year-old children (6 male, 14 female) in Sydney, Australia who were developing typically. The school was located in a middle class area. 9 female teachers, selected by the school principal as representative of the school staff, were interviewed.	Quasi-experimental: Materials that had no defined purpose were placed on a school playground for 11 weeks. The Test of Playfulness (ToP) was used to compare videotaped play segments pre- and postintervention. Teachers who did playground duty were interviewed regarding changes in play.	Teachers reported that children were more social, creative, and resilient when the materials were on the playground. Children who were creative, rather than very physically capable, became leaders in activity. Unstructured materials promoted play between children who had not played together previously--including children who had formerly been excluded.	3.5	+
15	Recreational facilities	Academic performance	Belch, H., Gebel, M., & Maas, G. (2000). Relationship between Student Recreation Complex Use, Academic Performance, and Persistence of First-time Freshmen. Journal of Student Affairs Research and Practice, 38(2), 220–234.	http://www.degruyter.com/view/j/jsarp.2001.38.2/jsarp.2001.38.2.1138/jsarp.2001.38.2.1138.xml?format=INT	The three cohort groups were established by using the institutional definition for first-time freshmen entering in fall 1993, fall 1994, and fall 1995 at a large public university in the southwest. The total number of freshmen in the cohorts was 11,076. Demographics: 52% are female, 53% are Arizona residents, and 21% are ethnic minorities. Nearly three quarters (73%) were SRC users during their f…	Cross sectional study of recreation complex use, grades, and attrition.	Freshmen who used the SRC (student recreation complex) persisted (didn't drop out) at a greater rate after 1 semester and after 1 year than their counterparts who did not use the SRC. Users also earned slightly higher GPAs and earned more credit hours at the end of the first year. This finding was of particular interest because the study also revealed that the SRC nonusers entered college with hi…	3.5	+
16	Recreation facilities	Mental health: academic performance	Huesman, R., Brown, A., Lee, G., Kellogg, J., & Radcliffe, P. (2007). Modeling Student Academic Success: Does Usage of Campus Recreation Facilities Make a Difference? Paper presented at The National Symposiumon Student Retention, Milwaukee September 24‐26, 2007.	http://www.oir.umn.edu/static/papers/CSRDE_2007/CSRDE_2007_Modeling_Student_Academic_Success_paper.pdf	5,344 students at the US mid-western study institution who entered as first-time full-time degree-seeking freshmen during the 2001 fall semester. The sample was composed of 49% male students, 0.7% American Indian, 4.0% Black, 1.9% Hispanic, 10.1% Asian, and 1.2% international students. About 17.1% of the students were Pell eligible this measure was used as a proxy measure of socioeconomic status.	Cross sectional study that examined CRF use, demographic variables, and grades.	CRF (college recreation facility) usage, while simultaneously controlling for other important academic, financial and social fit factors, does have a positive association with academic success. There is a social factor associated with using CRF that promotes social integration of the individual with the campus community.	3	+
17	Recreational facilities	Physical health (BMI)	Scott M., Cohen D., Evenson K., Elder J., Catellier D., Ashwood JS, et al. (2007). Weekend Schoolyard Accessibility, Physical Activity, and Obesity: The Trial of Activity in Adolescent Girls (TAAG) Study. Preventive Medicine, 44, 398–403.	http://www.ncbi.nlm.nih.gov/pmc/articles/PMC1978099/	We drew a half-mile (0.805 km) radius around the residences of participants in Trial of Activity for Adolescent Girls (n=1556) in Maryland, South Carolina, Minnesota, Louisiana, California, and Arizona. We visited all schools and parks within the defined distance and documented their amenities and accessibility on Saturdays in Spring 2003. Staff gathered data on each girls’ height and weight and …	Cross sectional study of recreation facilities (weekend accesibility), physical activity and BMI	Schools represented 44% of potential neighborhood sites for physical activity. The number of locked schools was associated with significantly higher BMI. The strong relationship identified between the number of locked schools and higher BMI may not be because of lower levels of physical activity resulting from more limited recreational resources, but rather because of other unmeasured factors lik…	3.5	+
18	Recreation facilities	Physical health (obesity)	Fernandes, M. & Sturm, R. (2010). Facility Provision in Elementary Schools: Correlates with Physical Education, Recess, and Obesity. Preventive Medicine, 50, S30–S35.	http://www.ncbi.nlm.nih.gov/pubmed/19850074	8935 fifth graders from the Early Childhood Longitudinal Survey Kindergarten Cohort (representative sample from U.S.). Data from the spring of 1999 wave (corresponding to kindergarten) and the spring of 2004 (corresponding to 5th grade) were used for the analysis. Children from racial/ethnic minority groups or attending private schools were oversampled and about 50% of children who changed school…	Cross-sectional: school administrator assessed the availability and adequacy of the school gymnasium, playground, multipurpose room, cafeteria, auditorium, and classroom.	Gymnasium and playground provision in 5th grade were not predictive of a lower obesity or overweight trajectory both overall and for stratifications separately by gender, obesity, or overweight status in kindergarten, household poverty, region, and climate zone. Gymnasium availability was associated with an additional 8.3 min overall and at least an additional 25 min of PE per week for schools in…	3.5	0
19	Joint use agreements	Social benefits	Maddock J, Choy L, Nett, B, McGurk M, & Tamashiro R. (2008). Increasing Access to Places for Physical Activity through a Joint Use Agreement: A Case Study in Urban Honolulu. Prev Chronic Dis, 5(3), 1–8.	http://www.ncbi.nlm.nih.gov/pmc/articles/PMC2483555/	The highschool (over 2500 students) serves students primarily from lower SES and ethnic minority backgrounds (14). Immigrants who require instruction in English as a second language make up a large proportion of the student population. Over 60% of students receive free or reduced-cost lunches. The top 3 ethnic groups represented by students are Filipino (58%), Samoan (13%), and Native Hawaiian (1…	The study involved several different surveys given to teachers, students, and community members re the implementation of the shared use agreement at a Honolulu highschool	All 68 faculty/staff respondents agreed that the program had a positive impact on the school and that it was beneficial to students. They reported that the program provided needed opportunities for PA, incurred social benefits (e.g., making new friends), kept students out of trouble, and promoted healthy lifestyles.	3.5	+
20	Joint use agreements	Economics	Bergsagel, V. (2006). Community Partnerships: Student Success and Community Vitality. School Planning & Mangagement, 15-16.		One high school in Federal Way, Washington	Report - not a quantitative study	In Federal Way, Washington, the city rebuilt a highschool (with a high rate of failing students) and added a Boys and Girls Club and a Head Start facility on the school grounds. The school, Boys and Girls Club, and the Head start program all share facilities, and now all three facilities are thriving and providing benefits to the students and community.	2	+
21	Joint use agreements	Social benefits: social cohesion	Cavallo, J. (2005). Phoenix Rising: An Innovative Mix of Students and Design Turns a Troubled School into a Startling Success. Edutopia Magazine, 1-2.	http://www.edutopia.org/phoenix-rising	Julia Richman Education Complex in New York City	Case study of one high school that was transformed into an educational complex with several joint use facilities	In 1993, a highschool with a graduation rate of 35% was transformed into a complex with four small high schools, an elementary school, a school for autistic children, an infant and toddler center for the young children of students, the Mt. Sinai Student Health Center and the Center for Inquiry in Teaching and Learning. Each school has its own staff, schedule, curriculum, and dedicated space, but …	2	+
22	Joint use agreements	Social benefits: increased graduation rates/ human capital	Cavallo, J. (2005). Phoenix Rising: An innovative Mix of Students and Design Turns a Troubled School into a Startling Success. Edutopia Magazine, 1-2.	http://www.edutopia.org/phoenix-rising	Julia Richman Education Complex in New York City	Case study of one high school that was transformed into an educational complex with joint use facilities	In 1993, a highschool with a graduation rate of 35% was transformed into a complex with four small high schools, an elementary school, a school for autistic children, an infant and toddler center for the young children of students, the Mt. Sinai Student Health Center and the Center for Inquiry in Teaching and Learning. Each school has its own staff, schedule, curriculum, and dedicated space, but …	2	+
23	Joint use agreements	Social benefits; Economics; Injury Prevention	Chung, C. (2002). Using Public Schools as Community-development Tools: Strategies for Community-based Developers. Cambridge, MA: Joint Center for Housing Studies, Harvard University and Neighborhood Reinvestment Corporation, pp. 1-46.	http://www.nw.org/network/pubs/studies/documents/schoolsCommDevelop2002.pdf	Non-systematic survey of reports, articles and over 20 in-person and telephone interviews. Number of articles reviewed not provided. United States	Non-systematic review of literature	One approach to joint use is to provide on-site services such as health care, job training and adult education. Joint-use changes the role of the school in the neighborhood, from an isolated institution for school-age children to a community hub. On-site services that promote intergenerational use, such as a senior center or computer learning center, also give seniors and childless professionals …	4	+
24	Joint use agreements	Social benefits: expanded learning opportunities for students	Nathan, J., & Febey, K. (2001). Smaller, Safer, Successful Schools. Minneapolis, MN: Center for School Change, Humphrey Institute, University of Minnesota.	http://www.archachieve.net/smallschools/Resources/articles/saneschools.pdf	Case studies of 22 public school buildings in 12 US states, including urban, suburban and rural schools, as well as district-run and charter public schools.	Case studies - not a quantitative study	Alpha students near Portland can take community college courses right in their building because their building shares space with a local community college. Students at the Minnesota School of Environmental Science participate in internships on environmental science, study animals, and help prepare exhibits because their school shares space with the Minnesota Zoo. A growing number of public school…	2	+
25	Joint use agreements	Social benefits: expansion of services for students and their families	Nathan, J., & Febey, K. (2001). Smaller, Safer, Successful Schools. Minneapolis, MN: Center for School Change, Humphrey Institute, University of Minnesota.	http://www.archachieve.net/smallschools/Resources/articles/saneschools.pdf	Case studies of 22 public school buildings in 12 US states, including urban, suburban and rural schools, as well as district-run and charter public schools.	Case studies - not a quantitative study	At El Puente Academy in New York City, students and their families have access to an array of services, including health care, literacy training, and counseling because these programs share facilities with the school. Better access to social services results in better family functioning and healthy youth development. When different social service agencies are together in the same building and are…	2	+
26	Joint use agreements	Social benefits: increased community programs	Nathan, J., & Febey, K. (2001). Smaller, Safer, Successful Schools. Minneapolis, MN: Center for School Change, Humphrey Institute, University of Minnesota.	http://www.archachieve.net/smallschools/Resources/articles/saneschools.pdf	Case studies of 22 public school buildings in 12 US states, including urban, suburban and rural schools, as well as district-run and charter public schools.	Case studies - not a quantitative study	Joint use agreements allow a community to offer programs, facilities, and services that it might otherwise not be able to afford. In Perham, MN, a community recreation building was constructed, maintained, and operated as a joint project by the city, school district, and local businesses -- none of which could afford the project on their own. Similarly, in Northfield, MN, the Northfield Community…	2	+
27	Joint use agreements	Economics	Lawrence, B., et al. (2005). Dollars & Sense II: Lessons from Good, Cost-Effective Small Schools. Seattle, WA: KnowledgeWorks Foundation.	http://www.bigpicture.org/wp-content/uploads/2008/11/051001-designshare.pdf	Case studies of 25 small schools in the United States	Case studies - not a quantitative study	Many schools take advantage of the athletic fields, gyms, and pools in their community, saving space and money while providing important outlets for students. H.S. Truman High School uses the adjacent park and Boys and Girls Club for athletics and other activities. C.C. Blaney Elementary and R.D. Schroder Middle schools share their common playground and athletic fields with the community. IDDS pr…	2	+
28	Joint use agreements	Social benefits	Filardo, M., Vincent, J., Allen, M., & Franklin, J. (2010). Joint Use of Public Schools: A Framework for a New Social Contract. Washington, DC: 21st Century School Fund.	http://citiesandschools.berkeley.edu/reports/2010_JU_Concept_Paper.pdf	Report, not a systematic review. United States	Research methods not reported. Unsystematic review of literature.	Public schools can serve as community “hubs,” and offer a range of medical, social, and other support services. Joint use strategies can directly enhance a school’s curriculum-related activities by partnering with local musuems, libraries, etc.. Joint use agreements can be used as a strategy to create "complete communities" where there are a variety of homes, jobs, shops, services and amenities n…	2	+
29	Joint use agreements	Economics	Filardo, M., Vincent, J., Allen, M., & Franklin, J. (2010). Joint Use of Public Schools: A Framework for a New Social Contract. Washington, DC: 21st Century School Fund.	http://citiesandschools.berkeley.edu/reports/2010_JU_Concept_Paper.pdf	Report, not a systematic review, United States	Research methods not reported. Unsystematic review of literature.	Local governments and school districts serve the same families and communities; using the public school as the location for community health centers, swimming pools, libraries, or other public amenities or services, can thereby reduce overall public land assets, capital funds, and total operating costs required. As more service and program providers seek to locate in or secure dedicated access to…	2	+
30	Joint use agreements	Economics	Cooper, T. & Vincent, J. (2008). Joint Use School Partnerships in California: Strategies to Enhance Schools and Communities. Berkeley, CA: Center for Cities & Schools and Public Health Law and Policy.	http://citiesandschools.berkeley.edu/reports/CCS_PHLP_2008_joint_use_with_appendices.pdf	Report, not a systematic review. United States	Research methods not reported. Unsystematic review of literature.	Joint use partners can save money by partnering with other entities. For example, land already owned by a partner may be utilized without having to purchase an additional site. Furthermore, partners may bring funding for capital expenses and/or operating costs. The desired result is that both school districts and partners get more space and/or programming for less cost than if they provided it th…	2	+
31	School siting (neighborhood school vs. city-wide school)	Environmental benefits (CO2 emission)	Wilson, EJ, Wilson, R, & Krizek, KJ. (2007). The Implications of School Choice on Travel Behavior and Environmental Emissions. Transportation Research Part D: Transport and Environment, 12: 506-518.	http://www.sciencedirect.com/science/article/pii/S1361920907000776	One K-6 school and one K-8 school (sample size and characteristics not reported). St. Paul, MN, USA	Map home location and route information for both schools, calculate home-to-school walking and driving distance, Assign transport mode based on national travel data, and estimate 2 scenarios for with/without bus service	The school travel-related CO2 emission of city-wide school students would be 4.5 times higher than neighborhood school students under the "no bus service" scenario	3.5	+
32	School siting (neighborhood school vs. city-wide school)	Environmental benefits (CO2 emission)	Wilson, EJ, Wilson, R, & Krizek, KJ. (2007). The Implications of School Choice on Travel Behavior and Environmental Emissions. Transportation Research Part D: Transport and Environment, 12: 506-518.	http://www.sciencedirect.com/science/article/pii/S1361920907000776	One K-6 school and one K-8 school (sample size and characteristics not reported). St. Paul, MN, USA	Map home location and route information for both schools, calculate home-to-school walking and driving distance, Assign transport mode based on national travel data, and estimate 2 scenarios for with/without bus service	The school travel-related CO2 emission of city-wide school students would be 3.8 times higher than neighborhood school students under the "bus service" scenario	3.5	+
33	School siting (neighborhood school vs. city-wide school and school busing)	Environmental benefits (CO2 emission)	Wilson, EJ, Wilson, R, & Krizek, KJ. (2007). The Implications of School Choice on Travel Behavior and Environmental Emissions. Transportation Research Part D: Transport and Environment, 12: 506-518.	http://www.sciencedirect.com/science/article/pii/S1361920907000776	One K-6 school and one K-8 school (sample size and characteristics not reported). St. Paul, MN, USA	Map home location and route information for both schools, calculate home-to-school walking and driving distance, Assign transport mode based on national travel data, and estimate 2 scenarios for with/without bus service	The school travel-related CO2 emission of neighborhood school students would be reduced by 10% if bus service was provided	3.5	+
34	School siting (neighborhood school vs. city-wide school and school busing)	Environmental benefits (CO2 emission)	Wilson, EJ, Wilson, R, & Krizek, KJ. (2007). The Implications of School Choice on Travel Behavior and Environmental Emissions. Transportation Research Part D: Transport and Environment, 12: 506-518.	http://www.sciencedirect.com/science/article/pii/S1361920907000776	One K-6 school and one K-8 school (sample size and characteristics not reported). St. Paul, MN, USA	Map home location and route information for both schools, calculate home-to-school walking and driving distance, Assign transport mode based on national travel data, and estimate 2 scenarios for with/without bus service	The school travel-related CO2 emission of city-wide school students would be reduced by 20% if bus service was provided	3.5	+

## Sheet: Buildings
WORKPLACE / BUILDINGS
RESOURCE #	FEATURE	CO-BENEFIT	RESOURCE	LINK	SAMPLE CHARACTERISTICS	METHODS	FINDINGS	GRADING THE EVIDENCE	DIRECTION OF ASSOCIATION
1	Building site design	Mental Health; Economics (Productivity/job performance)	Kaplan, R. (1993). The Role of Nature in the Context of the Workplace. Landscape and Urban Planning, 26(1), 193-201.	http://www.sciencedirect.com/science/article/pii/0169204693900167	Compared two studies: 1) Desk workers with views (n=55) and without (n=60) and outdoor workers (n=48) and 2) a study of 615 sedentary workers. United States.	Developed a theoretical model based on 2 cross-sectional self-report studies	Windows that provide views of nature, even only several trees, landscaping or vegetation, are associated with psychological benefits, including job satisfaction and productivity. Windows are a way for one to rest directed attention, so that he/she can look up and experience nature. For example, satisfaction with view was significantly associated with job challenge, work frustration, task enthusia…	3.5	+
2	Worksite PA policies and programs	Economics (Productivity/job performance)	Aldana, SG, & Pronk, NP. (2001). Health Promotion Programs, Modifiable Health Risks, and Employee Absenteeism. Journal of Occupational and Environmental Medicine, 43(1), 36-46.	http://www.acoem.org/Page3Column.aspx?PageID=7351&id=1370	68,912 adult employees from the 9 relevant studies; international	Systematic review identified 43 articles related to abseentism	9 studies were identified related to worksite health promotion programs and absenteeism; most studies support the hypothesis that employees who participate in worksite health promotion programs have lower absentee rates but because of the quasi-experimental nature of the majority of the studies and different methods of collecting and reporting data, it is difficult to make a conclusion. Participa…	4.5	weak +
3	Worksite PA policies and programs	Economics (Productivity/job performance); physical health	Identified from Aldana & Pronk review: Bertera, RL. (1993). Behavioral Risk Factor and Illness Day Changes with Workplace Health Promotion: Two-year Results. American Journal of Health Promotion, 7(5), 365-373.	http://ajhpcontents.org/doi/abs/10.4278/0890-1171-7.5.365	7,178 participants from a large manufacturing company with more than 100 US locations.	The study employed a pretest/posttest intervention group (N=7,178) with a two-year follow-up and a time-lagged, nonequivalent comparison group (N=7,101).	The intervention consisted of 1) training and support of coordinators; 2) health risk appraisals; 3) on-site classes, safety meetings, and self-help options; 4) environmental changes, e.g., smoking policy, cafeteria offerings, and blood pressure machines; and 5) recognition. Both the number and the level of behavioral risk factors improved over two years. The proportion of employees with three or…	3.5	+
4	Building itself	Mental health	Weich S, Blanchard M, Prince M, Burton E, Erens B, & Sproston, K. (2002). Mental Health and the Built Environment: Cross-sectional Survey of Individual and Contextual Risk Factors for Depression. British Journal of Psychiatry, 180, 428-433.	http://www.ncbi.nlm.nih.gov/pubmed/11983640	1887 individuals >16 years in two electoral wards in north London.	Cross-sectional self-report survey to the individuals and the built environment rated using a validated measure (BESSC).	Individuals living in housing areas characterized by properties of recent construction (post-1969) and with predominantly deck access experiences significantly higher rates of depression. This association was significant even after adjusting for demographic characteristics like SES and internal home characteristics. Though not significant after adjusting for demographics, certain physical incivil…	3.5	+
5	Mixed use around the workplace	Environmental benefits; economics-economic performance of cities (?)	Ewing, RH, & Kreutzer, R. (2006). Understanding the Relationship Between Public Health and the Built Environment: A Report Prepared For the LEED-ND Core Committee. Organisation for Economic Co-operation and Development.	http://www.cnu.org/sites/www.cnu.org/files/leed_public_health.pdf	Neighborhoods and worksites within the US	Review of public health and the built environment	Mixed uses in employment districts can decrease personal vehicle trips and increase transit ridership because retail near employment buildings lets employees an opportunity to substitute pedestrian-based trips instead of vehicle-based one. Residents of mixed-use neighborhoods use less motorized travel than those in purely residential areas, where the average distance per trip was half of those in…	4	+
6	Building itself (stairs)	Physical Health	Nicoll, G. (2007). Spatial Measures Associated with Stair Use. American Journal of Health Promotion, 21(4s), 346-352.	http://ajhpcontents.org/doi/abs/10.4278/0890-1171-21.4s.346	10 three- or four-story academic buildings on two US university campuses (38 stairs and 12 elevators total)	Cross-sectional study investigated the relationship between stair use and the design and location of stairs	Spatial elements were more important than design elements. 8 spatial elements that were significant were: travel distances from stair to nearest entrance and the elevator, effective area or occupant load of each stair, accessibility of each stair, area of stair isovist (a person's visual field from a specific point of reference within a building floor plan), number of turns required for travel fr…	3.5	+
7	Worksite PA Policies and programs	Physical health; Economics (health care costs, productivity/job performance)	Goetzel, RZ, & Ozminkowski, RJ. (2008). The Health and Cost Benefits of Work Site Health-promotion Programs. Annual Review of Public Health, 29, 303-323.	http://www.ncbi.nlm.nih.gov/pubmed/18173386	Review of over 80 studies. United States.	Review of different studies and other reviews to condense findings	Work site health promotion (WHP) programs support primary, secondary and tertiary prevention efforts; the driving force is increasing health care costs. This comprehensive review identified 7 effective components for effective WHP programs. Within addressing environmental and policy factors of the programs, organizations that foster environmental support provide healthy food choices in cafeterias…	4	+
8	Workplace furniture design	Physical health	Alkhajah, TA, Reeves, MM, Eakin, EG, Winkler, EAH, Owen, N, Healy, GN. (2012). Sit-Stand Workstations: A Pilot Intervention to Reduce Office Sitting Time. American Journal of Preventive Medicine; 43(3): 298-303.	http://www.ncbi.nlm.nih.gov/pubmed/22898123	Office workers (intervention n=18, control n=14) aged 20-65 years from Brisbane, Australia	Quasi-experimental design with intervention of sit-stand workstations in one workplace compared with another physically separate workplace	Sitting time is a health risk that is especially prevalent among office-based workers. The intervention group (sit-stand workstations) reduced sitting time by 143 minute/days at work and 97 minutes/day during all waking time, which was maintained at 3-month follow-up. The intervention group increased HDL cholesterol by an average of 0.26 mmol/L.	3.5	+
9	Worksite PA policies and programs	Economics (health care costs)	Goetzel, RZ. (2008). Workplace Health Promotion: Policy Recommendations that Encourage Employers to Support Health Improvement Programs for their Workers (Doctoral dissertation, Emory University).	http://www.prevent.org/data/files/initiatives/workplacehealtpromotion-policyrecommendations.pdf	Numerous studies and reviews. United States	Reviewed work place health promotion reviews and studies to arrive at policy recommendations	The past 30 years have shown positive evidence of workplace programs and policies. Evidence from experimental and quasi-experimental study designs show that workplace programs with tailored communications and individualized counseling for high-risk individuals are likely to produce a positive return on investment (ROI)-for every dollar invested over a three-year period, the ROI ranges from $1.40-…	4	+
10	Building itself (stairs)	Physical health	StairWELL to better health. Centers for Disease Control and Prevention Healthy Worksite Initiative Web site. http://www .cdc.gov/nccdphp/dnpao/hwi/toolkits/stairwell/index.htm. Accessed January 2014.	http://www.cdc.gov/nccdphp/dnpao/hwi/toolkits/stairwell/	A single Atlanta-based Koger Center Rhodes Building	A 3.5 year passive intervention to modify stairwells in the building and track stair use	A four-stage passive intervention was implemented over 3½ years that included painting and carpeting, framed artwork, motivational signs, and music. Infrared beams were used to track the number of stair users. "StairWELL to Better Health" was a low-cost intervention (less than $16,000*) that increased stair users.	2	+
11	Building itself (stairs vs elevator)	Physical health	Olander, EK, & Eves, FF. (2011). Elevator Availability and Its Impact on Stair Use in a Workplace. Journal of Environmental Psychology, 31(2), 200-206.	http://www.sciencedirect.com/science/article/pii/S0272494411000235	A 12-floor worksite where most employees (N=803) had desk based work duties. The building had a central stairwell with 2 elevators on either side and then 2 other elevator (1 was out of order for part of the study). United Kingdom.	Naturalistic experiment to observe elevator entry/exit and stairwell entry/exit using unobtrusive automatic counters.	Stair climbing is associated with health benefits including a decreased risk for cardiovascular disease. The study investigated the impact of elevator availability, pedestrian traffic (number using the elevator and stairs per minute), building occupancy (total individuals in the building) and time of day on stair ascent and descent in a workplace. Stair use increased for three elevators compared …	3.5	+
12	Building itself (stairs)	Physical health	Meyer, P, Kayser, B, & Mach, F. (2009). Stair Use for Cardiovascular Disease Prevention. European Journal of Cardiovascular Prevention & Rehabilitation, 16(2 suppl), S17-S18.	http://cpr.sagepub.com/content/16/2_suppl/S17.extract	Review of 6 studies that investigated the influence of stair use on fitness and CVD risk factors. International	Mix of designs, including RCTs and longitudinal cohort	Though the limited because of the small samples and types of studies, it seems that for 100-150 climbed floors each week correspond to -12 minutes of daily exercise the improvement in aerobic capacity (VO2max) can reach more than 10% corresponding to an increase in aerobic capacity of approximately 1 MET. This magnitude of improvement has been associated with a 12-20% reduction of all cause morta…	4	+
13	Workplace furniture design	Physical health; Economics (productivity/job performance)	Husemann, B, Von Mach, CY, Borsotto, D, Zepf, KI, & Scharnbacher, J. (2009). Comparisons of Musculoskeletal Complaints and Data Entry between a Sitting and a Sit-stand Workstation Paradigm. Human Factors: The Journal of the Human Factors and Ergonomics Society, 51(3), 310-320.	http://hfs.sagepub.com/content/51/3/310.short	60 male participants aged 18-35 in sedentary office work positions. Germany.	RCT comparing the effect of a sit-stand workstation during data entry office work compared to standard workstations (sitting)	A sit-stand workstation paradigm reduces musculoskeletal complaints without considerably affecting data entry efficiency under the presented study conditions (young male participants, short duration, fixed and controlled sit-stand workstation paradigm, simulated experimental working condition). There was a small, though nonsignificant, loss of efficiency in data entry while standing.	3.5	+
14	Building itself	n/a	McGann, S, Jancey, J, & Tye, M. (2013). Taking the Stairs Instead: The Impact of Workplace Design Standards on Health Promotion Strategies. The Australasian Medical Journal, 6(1), 23–8.	http://www.ncbi.nlm.nih.gov/pmc/articles/PMC3575063/	Reviewed Australian building codes, architecture of buildings and the health promotion "Find Thirty Everyday" campaign	Reviewed Australian building codes and buildings, plus the effectiveness of the "Find Thirty Everyday" campaign used to encourage stair use when placed in build environments that do not support stair use	The effect of the environment, the actual design, of the worksite upon entering encourages using the elevator-despite health promotion signs saying take the stairs. Building codes need to include priorities and mandates for stair buildings and quality beyond serving as a fire escape, as they do for elevators. Many buildings have prominently displayed elevators, with shiny and inviting doors that …	3.5	+
15	Building itself (fitness center)	Economics (Productivity/job performance)	Burton, WN, McCalister, KT, Chen, CY, & Edington, DW. (2005). The Association of Health Status, Worksite Fitness Center Participation, and Two Measures of Productivity. Journal of Occupational and Environmental Medicine, 47(4), 343-351.	http://www.ncbi.nlm.nih.gov/pubmed/15824625 or http://www.vielife.com/compendium/en-us/benefits/67/on-site-fitness-center-ups-staff-productivity-and-reduces-absence	999 employees of Bank One in the US who taken a health appraisal and Work Limitations Questionnaire in 2003	Cross-sectional study that examined he association between an on-site corporate fitness center on employees productivity an absenteeism.	The researchers used data from the questionnaires and absence records to compare the data of employees who used the fitness center (n=200) and those who did not (n=799). When baseline demographic differences were controlled for, strong associations were found between participation in the fitness center and improved productivity, as well as reduced work absence. Fewer fitness center participants r…	3.5	+
16	workplace furniture design (treadmill desks)	Physical health; Economics (productivity/job performance)	Koepp, GA, Manohar, CU, McCrady‐Spitzer, SK, Ben‐Ner, A, Hamann, DJ, Runge, CF, & Levine, JA. (2013). Treadmill Desks: A 1‐year Prospective Trial. Obesity, 21(4), 705-711.	http://onlinelibrary.wiley.com/doi/10.1002/oby.20121/full	36 participants (25 women and 11 men) with sedentary jobs at Educational Credit Management Corporation in Oakdale, MN. and 15 were overweight and 11 obese at baseline	1-year intervention where 36 participants had their standard desks replaced with tread-mill desks	Access to treadmill desks may improve the health of office workers without affecting work performance. There were no significant changes in employee workplace performance either as self-assessed or assessed by supervisors. PA, measured with accelerometers, increased greatly for all. Although weight loss was significant, it was modest though obese participants showed the greatest loss. HDL signifi…	3.5	0 (mixed)
17	Worksite PA policies and programs	Economic (health care costs)	Baicker, K, Cutler, D, & Song, Z. (2010). Workplace Wellness Programs Can Generate Savings. Health Affairs, 29(2), 304-311.	http://content.healthaffairs.org/content/29/2/304.short	Meta-Analysis of 36 employee wellness programs studies (from 32 articles). United States	Focused on studies with a comparison group (non-participants). Then compiled standardized estimates of return on investment from each study	The characteristics of the wellness programs varied, although 80% of the studies used the health risk assessment as an initial intervention and/or requirement to participate in the program. The most commons foci of the programs were obesity and smoking, with 60% of the programs explicitly focused on weight loss and fitness (among other risks). 75% of the studies focused on more than one risk fact…	4.5	+
18	Building itself	Environmental benefits (air quality); Economics (productivity/job performance); physical health (air quality too)	CABE. Office design and business performance: Technical Report. London: DEGW. 2004.	http://webarchive.nationalarchives.gov.uk/20110118095356/http://www.cabe.org.uk/files/impact-office-design-full-research.pdf	Analyses of existing research related to building design and building performance. United Kingdom	Identified research in relevant areas in building performance related to a variety of areas including the health and comfort of staff.	Workplace design and the impact on worker productivity and satisfaction is difficult to quantify, yet 24% of job satisfaction is associated with workplace. Additionally 5% of individual performance and 11% of team performance (b/c of improved team interaction) are associated with the workplace. Important factors associated with the building are: access to daylight, air quality and quantity, tempe…	4.5	+
19	Building itself	Mental health; Disparities	Evans, G. W. (2003). The built environment and mental health. Journal of Urban Health, 80(4), 536-555.	http://www.ncbi.nlm.nih.gov/pmc/articles/PMC3456225/pdf/11524_2006_Article_257.pdf	Review of literature related to the built environment and mental health, specifically direct and indirectly pathways (n=64 direct mental effects of the physical environment). International.	Studies included: case controls, intervention studies, randomized filed studies, longitudinal studies, cross-sectional studies, and case studies	High rise housing is associated with elevated psychological distress, especially among low-income mothers. The quality of the neighborhood, in terms of social an physical attributes, are associated with greater psychological distress and poorer cognitive development in children. Residential density, in terms of crowding (the number of people in a room), is associated as being unassociated to psyc…	4	-
20	Building itself	Environmental benefits; Economics benefits: Economic performance of cities	U.S. Green Building Council Inc. , & Sierra Club, (2011).Green buildings for cool cities: a guide for advancing local green building policies . Washington, DC:	http://www.usgbc.org/Docs/Archive/General/Docs6445.pdf	United States	Review of legal information about green buildings and codes, as well as samples of effective policies and outcomes.	A green building is one that is designed and constructed to reduce the overall impact of the built environment on human health and the natural environment. Green buildings are designed to efficiently use energy, water, and other natural resources, protect occupant health, improve employee productivity, and reduce pollution. Green, high-performance buildings consume 26% less energy, account for 33…	4	+
21	Worksite PA policies and programs	Environmental benefits	Office of Air and Radiation, (2005). Parking cash out: Implementing commuter benefits as one of the nation's best workplaces for commuters. Retrieved from United States Environmental Protection Agency website: http://www.bestworkplaces.org/pdf/ParkingCashout_07.pdf	http://www.bestworkplaces.org/pdf/ParkingCashout_07.pdf	Different case studies of companies that established a parking cash out program. United States	A review of literature, especially case studies, assessing the effectiveness and benefits of parking cash out programs	A cash out program offers employees $30/month cash (or in vanshare money, etc.) instead of paying for the monthly parking. This is best for companies that lease parking spots and where parking is difficult. Because there is no detrimental effect on employees who continue to drive alone, both employees who drive alone and those who do not perceive the program as fair. Monitored cash out programs s…	4	+
22	Building itself	Physical health; Environmental	Active Design Guidelines: Promoting Physical Activity and Health in Design	http://centerforactivedesign.org/dl/guidelines.pdf	United States	Review of studies (case studies as well) determining how PA and health can be promoted through the build environment and modifications	Encourage stair usage by designing prominent and attractive stairs, which is associated with cardiovascular health and has been shown to raise good cholesterol levels. Although stairs are often designated for fire egress, alternative assemblies, material and systems are available that allow egress stairs to be more visible while meeting code requirements for fire resistance ratings. Elevator use …	4	+
23	Worksite PA policies and programs	Physical health; Economics (Productivity/job performance)	Active Design Guidelines: Promoting Physical Activity and Health in Design	http://centerforactivedesign.org/dl/guidelines.pdf	United States	Review of studies (case studies as well) determining how PA and health can be promoted through the build environment and modifications	Workplace PA programs in the US have been shown to reduce short-term sick leave and health care costs and to increase productivity.	4	+
24	Siting; Building site design	Physical health	Active Design Guidelines: Promoting Physical Activity and Health in Design	http://centerforactivedesign.org/dl/guidelines.pdf	United States	Review of studies (case studies as well) determining how PA and health can be promoted through the build environment and modifications	Locate buildings and building entrances near public transit stops and along transit corridors; a study in NY found an inverse relationship between density of bus and subway stops and obesity among residents (after controlling for socioeconomic factors). When designing offices and commercial spaces, provide exercise facilities or walking paths nearby. Research indicates that access to trails and e…	4	+
25	Building site design	Physical health	Affordable Designs for Affordable Housing		11 case studies of affordable housing from 3 US cities (NYC, Atlanta, GA and San Antonio, TX)	11 case studies of communities with affordable housing and emphasis on PA	Increased exposure to green space is associated with higher activity levels and other positive health outcomes, including stress management and improved mental health. Some of the developers in this study have identified further potential advantages to tenant stability in improving tenants health. Though tenant demand for affordable housing is high, and there is no shortage of tenants waiting to …	4	+
26	Building site design	Physical health; mental health	Tzoulas, K., Korpela, K., Venn, S., Yli-Pelkonen, V., Kaźmierczak, A., Niemela, J., & James, P. (2007). Promoting ecosystem and human health in urban areas using green infrastructure: a literature review. Landscape and urban planning, 81(3), 167-178.	http://www.sciencedirect.com/science/article/pii/S0169204607000503	20 studies that explored the contributions of green spaces and nature to human health. International	Non-systematic literature review looking at different outcomes associated with green infrastructure to create a conceptual model	Green views increase the effectiveness of people in facing major crises, and lessen aggression by reducing mental fatigue. Natural views restore attention fatigue; and quicken recovery of attention-demanding cognitive performance. Even passive viewing of natural environments after negative antecedent conditions, such as attention fatigue or psycho-physiological stress, produces stress-amelioratin…	4	+
27	Building site design	Mental health; physical health	Jackson, L. E. (2003). The relationship of urban design to human health and condition. Landscape and urban planning, 64(4), 191-200.	http://www.sciencedirect.com/science/article/pii/S016920460200230X	International	Studies could be peer-reviewed lit, conference proceedings, books, or the print media, but all had to focus on design to benefit human condition, which encompasses physical and mental well-being, environmental quality, and overall quality of life.	The most healthful architecture exposes inhabitants to natural light and ventilation, views of greenery, and close proximity to outdoor green space. Landscape architecture appears to be the primary key at the finest scale to sound mind and body. Window views onto green vegetation, rather than bare dirt or pavement, with increased cognitive function in low-income children. Recuperation from surger…	4	+
